# Supplementary material for: Multi-Trait Selection Index for the Improvement of Agronomic and Yield Traits in Rice (Oryza sativa L.)
Source: Research Square preprint supplement (doi:10.21203/rs.3.rs-8445346/v1), 2026-01-24
Supplement: Supplementary file 1 [file 5524749c10f17f620aaa0893.docx]

Table 1: Descriptive statistics, ANOVA, variance components and broad-sense heritability estimate for the rice genotypes evaluated.

| **Trait** | **Unit** | **Descriptive statistics** | | | | **ANOVA** | **Variance**  **Components (%)** | | **H2**  **(%)** |
| --- | --- | --- | --- | --- | --- | --- | --- | --- | --- |
| **Mean** | **Range** | **SD** | **CoV**  **(%)** | **F-prob**  **Geno** | **GCV** | **PCV** |
| Grain yield | t/ha | 30.4 | 39.2 | 5.5 | 18.1 | p<0.001 | 14.2 | 17.2 | 86.3 |
| Hundred grain weight | G | 3.3 | 3.4 | 0.4 | 13.2 | p<0.001 | 9.8 | 12.5 | 82.3 |
| Grain thickness | Mm | 2.1 | 2.5 | 0.2 | 9.8 | p<0.001 | 4.2 | 9.5 | 42.4 |
| Grain length | Mm | 6.6 | 3 | 0.5 | 7.7 | p<0.001 | 5.2 | 7 | 78.9 |
| Grain width | Mm | 2.6 | 3 | 0.3 | 13 | p<0.001 | 10 | 12.3 | 85.1 |
| Grain length-to-width ratio | – | 2.6 | 2.9 | 0.2 | 8.9 | p<0.001 | 4.1 | 8.4 | 47.9 |
| Tiller number | – | 11.7 | 21.3 | 1.4 | 11.9 | p<0.001 | 8.2 | 11.3 | 76.9 |
| Panicle number | – | 11.2 | 10 | 1.1 | 10.1 | p<0.001 | 7.9 | 9.6 | 86.1 |
| Panicle length | Cm | 25.2 | 37 | 4.7 | 18.8 | p<0.001 | 12.6 | 17 | 78.4 |
| Heading days | Days | 88.4 | 42 | 7 | 7.9 | p<0.001 | 6.1 | 7.5 | 85.3 |
| Maturity days | Days | 124 | 48 | 8.4 | 6.8 | p<0.001 | 5.4 | 6.5 | 87.8 |
| Culm length | Cm | 77.3 | 95.3 | 14.6 | 19 | p<0.001 | 12.7 | 17.2 | 78.1 |
| Sterile lemma length | Mm | 2.6 | 9.1 | 0.4 | 15.2 | p<0.001 | 6.1 | 14.3 | 40 |
| Plant height | Cm | 102.5 | 110.7 | 16 | 15.6 | p<0.001 | 10.2 | 14.1 | 76.7 |

Table 2: Variable coordinates, eigenvalues, percent variance and cumulative variance for all traits evaluated traits**.**

| **Variables** | **PC1** | **PC2** | **PC3** |
| --- | --- | --- | --- |
| GY | 0.91 | -0.38 | -0.05 |
| GW | 0.89 | -0.43 | 0.00 |
| TN | 0.86 | -0.38 | -0.14 |
| PN | 0.86 | -0.46 | -0.12 |
| HGW | 0.92 | -0.36 | 0.02 |
| HD | -0.92 | 0.37 | 0.02 |
| MD | -0.88 | 0.43 | 0.11 |
| PH | 0.63 | 0.75 | -0.15 |
| CL | 0.70 | 0.68 | -0.16 |
| PL | 0.63 | 0.75 | -0.20 |
| GT | 0.82 | -0.24 | 0.42 |
| GL | 0.60 | 0.76 | -0.19 |
| SLEMMAL | 0.62 | 0.65 | 0.36 |
| GLWR | 0.70 | 0.58 | 0.35 |
| **Eigenvalues** | **8.75** | **4.10** | **0.60** |
| **Variance (%)** | **62.47** | **29.3** | **4.30** |
| **Cumulative variance (%)** | **62.47** | **91.77** | **96.07** |

Table 3: Factorial loadings after varimax rotation, communalities, and selection gains for agro-morphological traits in rice genotypes. (Bold values represent traits with high contribution to each factor).

| **Variables** | **FA1** | **FA2** | **Communality** | **Xo** | **Xs** | **SDperc** | **SGperc** | **Sense** | **Goal** |
| --- | --- | --- | --- | --- | --- | --- | --- | --- | --- |
| GY | **0.9** | 0.2 | 0.8 | 30.4 | 35.4 | 16.2 | 14 | increase | 100 |
| HGW | **0.9** | 0.2 | 0.9 | 3.3 | 3.7 | 10.5 | 8.6 | increase | 100 |
| GT | **-0.8** | -0.2 | 0.7 | 25.2 | 25.1 | -0.4 | -0.3 | increase | 0 |
| GL | 0.1 | **0.9** | 0.9 | 6.6 | 6.6 | -0.6 | -0.4 | increase | 0 |
| GW | **-0.9** | -0.1 | 0.9 | 2.6 | 2.8 | 9.8 | 8.3 | decrease | 0 |
| GLWR | 0.3 | **0.9** | 0.8 | 2.6 | 2.6 | -0.1 | -0.1 | increase | 0 |
| TN | **0.9** | 0.1 | 0.9 | 11.7 | 12.5 | 6.8 | 5.2 | increase | 100 |
| PN | **0.9** | 0.1 | 0.9 | 11.2 | 12.1 | 7.6 | 6.6 | increase | 100 |
| PL | 0.1 | **0.9** | 0.8 | 77.3 | 78.5 | 1.6 | 1.3 | decrease | 0 |
| HD | **0.8** | 0.2 | 0.9 | 88.4 | 82.5 | -6.7 | -5.7 | decrease | 100 |
| MD | **0.8** | 0.1 | 0.9 | 124 | 115.8 | -6.6 | -5.8 | decrease | 100 |
| CL | -0.2 | **-0.9** | 0.9 | 102.5 | 101.9 | -0.6 | -0.4 | decrease | 100 |
| SLEMMAL | -0.2 | **-0.9** | 0.8 | 2.6 | 2.6 | -0.3 | -0.1 | decrease | 100 |
| PH | -0.1 | **-0.8** | 0.7 | 2.1 | 2.1 | 2.2 | 0.9 | decrease | 0 |

| Table S1: Institute of origin of the 295 Rice genotypes evaluated | | | | |
| --- | --- | --- | --- | --- |
|  |  |  |  |  |
|  |  |  |  |  |
| **Rice genotypes** | **Origin** |  |  |  |
| 228 | KAFACI |  |  |  |
| 644 Gold | KUMASI-CRI |  |  |  |
| 80 DAYS-SARI | NYANKPALA-SARI | |  |  |
| AFRICARICE 4 | AFRICARICE |  |  |  |
| AFRICARICE 6 | AFRICARICE |  |  |  |
| AgKE99-26 | KUMASI-CRI |  |  |  |
| AgKE99-32 | KUMASI-CRI |  |  |  |
| AgKE99-56 | KUMASI-CRI |  |  |  |
| AGRA-CRI-LOL-1-11 | KUMASI-CRI |  |  |  |
| AGRA-CRI-LOL-1-21 | KUMASI-CRI |  |  |  |
| AGRA-CRI-LOL-1-7 | KUMASI-CRI |  |  |  |
| AGRA-CRI-LOL-2-27 | KUMASI-CRI |  |  |  |
| AGRA-CRI-LOL-2-29 | KUMASI-CRI |  |  |  |
| AGRA-CRI-LOL-2-7 | KUMASI-CRI |  |  |  |
| AGRA-SARI | NYANKPALA-SARI | |  |  |
| ARICA 2 | AFRICARICE |  |  |  |
| ARICA 3 | AFRICARICE |  |  |  |
| ART1005-21-1-1-1-B | AFRICARICE |  |  |  |
| ART100-56-1-1-B-B | AFRICARICE |  |  |  |
| ART100-57-1-2-B-B | AFRICARICE |  |  |  |
| ART101-99-1-2-B-B | AFRICARICE |  |  |  |
| ART105-3-1-2-B-B | AFRICARICE |  |  |  |
| ART108-2-1-1-B-B | AFRICARICE |  |  |  |
| ART112-74-1-1-B-B | AFRICARICE |  |  |  |
| ART112-85-1-1-B-B | AFRICARICE |  |  |  |
| ART120-26-1-1-B-B | AFRICARICE |  |  |  |
| ART125-26-1-1-B-B | AFRICARICE |  |  |  |
| ART132-35-1-1-B-B | AFRICARICE |  |  |  |
| ART143-150-B-1-B-B | AFRICARICE |  |  |  |
| ART152-3-1-1-B-B | AFRICARICE |  |  |  |
| ART174-2-1-1-B-B | AFRICARICE |  |  |  |
| ART216-133-B-1-B-B | AFRICARICE |  |  |  |
| ART216-149-B-1-B-B | AFRICARICE |  |  |  |
| ART216-173-B-1-B-B | AFRICARICE |  |  |  |
| ART216-187-B-1-B-B | AFRICARICE |  |  |  |
| ART216-212-B-1-B-B | AFRICARICE |  |  |  |
| ART245-1-16-1-B-B | AFRICARICE |  |  |  |
| ART245-1-40-1-B-B | AFRICARICE |  |  |  |
| ART248-1-97-1-B-B | AFRICARICE |  |  |  |
| ART263-11-B-1-B-B | AFRICARICE |  |  |  |
| ART314-14-B-1-B-B | AFRICARICE |  |  |  |
| ART350:10-2-1-B | AFRICARICE |  |  |  |
| ART350:2-4-3-B | AFRICARICE |  |  |  |
| ART350:2-6-1-B | AFRICARICE |  |  |  |
| ART387-2-1-1-1-0 | AFRICARICE |  |  |  |
| ART387-9-1-1-1-B | AFRICARICE |  |  |  |
| ART397-12-1-1-1-B | AFRICARICE |  |  |  |
| ART397-3-2-1-1-B | AFRICARICE |  |  |  |
| ART430-16-1-1-1-5 | AFRICARICE |  |  |  |
| ART478-13-8-1-1-B | AFRICARICE |  |  |  |
| ART478-8-1-1-1-B | AFRICARICE |  |  |  |
| ART483-10-1-1-1-B | AFRICARICE |  |  |  |
| ART484-19-1-1-1-B | AFRICARICE |  |  |  |
| ART493-16-1-1-1-B | AFRICARICE |  |  |  |
| ART58-46-1-1-B-B | AFRICARICE |  |  |  |
| ART58-5-1-1-B-B | AFRICARICE |  |  |  |
| ART64-31-1-1-B-B | AFRICARICE |  |  |  |
| ART64-32-1-1-B-B | AFRICARICE |  |  |  |
| ART64-55-1-1-B-B | AFRICARICE |  |  |  |
| ART67-17-1-1-B-B | AFRICARICE |  |  |  |
| ART67-21-1-2-B-B | AFRICARICE |  |  |  |
| ART68-12-1-1-B-B | AFRICARICE |  |  |  |
| ART71-2-1-1-B-B | AFRICARICE |  |  |  |
| ART71-96-1-1-B-B | AFRICARICE |  |  |  |
| ART73-69-1-2-B-B | AFRICARICE |  |  |  |
| ART75-14-1-2-B-B | AFRICARICE |  |  |  |
| ART75-30-1-1-B-B | AFRICARICE |  |  |  |
| ART75-33-1-1-B-B | AFRICARICE |  |  |  |
| ART75-56-1-2-B-B | AFRICARICE |  |  |  |
| ART75-57-1-1-B-B | AFRICARICE |  |  |  |
| ART75-8-1-2-B-B | AFRICARICE |  |  |  |
| ART79-12-1-1-B-B | AFRICARICE |  |  |  |
| ART84-35-1-1-B-B | AFRICARICE |  |  |  |
| ART85-48-1-1-B-B | AFRICARICE |  |  |  |
| ART90-12-1-1-B-B | AFRICARICE |  |  |  |
| ART90-46-1-1-B-B | AFRICARICE |  |  |  |
| ART90-9-1-1-B-B | AFRICARICE |  |  |  |
| ART93-112-1-1-B-B | AFRICARICE |  |  |  |
| ART98-147-1-1-B-B | AFRICARICE |  |  |  |
| ART98-4-1-1-B-B | AFRICARICE |  |  |  |
| Awarema | KUMASI-CRI |  |  |  |
| BETIA | KUMASI-CRI |  |  |  |
| BOUKE 189 | KUMASI-CRI |  |  |  |
| CK3 | KUMASI-CRI |  |  |  |
| CRI-1-11-15-21 | KUMASI-CRI |  |  |  |
| CRI-1-11-15-5 | KUMASI-CRI |  |  |  |
| CRI-1-11-19-12 | KUMASI-CRI |  |  |  |
| CRI-1-21-5-12 | KUMASI-CRI |  |  |  |
| CRI-AgraRice | KUMASI-CRI |  |  |  |
| CRI-AMANKWATIA | KUMASI-CRI |  |  |  |
| CRI-Dartey | KUMASI-CRI |  |  |  |
| CRI-Emopa | KUMASI-CRI |  |  |  |
| CRI-Kantinka | KUMASI-CRI |  |  |  |
| CRI-Mpuntuo | KUMASI-CRI |  |  |  |
| CRI-Oboafo | KUMASI-CRI |  |  |  |
| Digang | KUMASI-CRI |  |  |  |
| DigJas-3 | KUMASI-CRI |  |  |  |
| DigJas-61 | KUMASI-CRI |  |  |  |
| DigJas-78 | KUMASI-CRI |  |  |  |
| Enapa | KUMASI-CRI |  |  |  |
| Ex-Baike (Asutware) | KUMASI-CRI |  |  |  |
| FKR 62N | KUMASI-CRI |  |  |  |
| Gigante | KUMASI-CRI |  |  |  |
| Gigante-SARI | NYANKPALA-SARI | |  |  |
| GR18-SARI | NYANKPALA-SARI | |  |  |
| HB3519-5 | KAFACI |  |  |  |
| HR32046F1-2-261 | KAFACI |  |  |  |
| HR32054F1-1-29-1 | KAFACI |  |  |  |
| HR32066F1-4-16-1 | KAFACI |  |  |  |
| HR32066F1-4-19-1 | KAFACI |  |  |  |
| HR32067F1-2-14-1 | KAFACI |  |  |  |
| HR32067F1-3-5-1 | KAFACI |  |  |  |
| HR32068F1-3-10-1 | KAFACI |  |  |  |
| HR32068F1-4-11-1 | KAFACI |  |  |  |
| HR32069F1-1-13-1 | KAFACI |  |  |  |
| HR32069F1-1-18-1 | KAFACI |  |  |  |
| HR32069F1-1-3-1 | KAFACI |  |  |  |
| HR32069F1-2-4-1 | KAFACI |  |  |  |
| HR32069F1-3-5-1 | KAFACI |  |  |  |
| HR32080-HB3567-4 | KAFACI |  |  |  |
| HR32086-HB3569-37 | KAFACI |  |  |  |
| IDS 85 | NYANKPALA-SARI | |  |  |
| IDSA85 | KUMASI-CRI |  |  |  |
| IR 84105-B-B-B-TGR4 | AFRICARICE |  |  |  |
| Japonica 1 | KAFACI |  |  |  |
| Jasmine 85-CRI | KUMASI-CRI |  |  |  |
| Jasmine 85-SARI | NYANKPALA-SARI | |  |  |
| JKE56-12 | KUMASI-CRI |  |  |  |
| JKE56-3 | KUMASI-CRI |  |  |  |
| JKE56-30 | KUMASI-CRI |  |  |  |
| KAF143 | KUMASI-CRI |  |  |  |
| KAF53 | KUMASI-CRI |  |  |  |
| KBR 10 | KUMASI-CRI |  |  |  |
| KBR 12 | KUMASI-CRI |  |  |  |
| KBR 2 | KUMASI-CRI |  |  |  |
| KBR V4 | KUMASI-CRI |  |  |  |
| KE40 | KAFACI |  |  |  |
| KE53 | KAFACI |  |  |  |
| Khao Hlanon(AfricaRice) | AFRICARICE |  |  |  |
| N1 | KUMASI-CRI |  |  |  |
| NERICA-L 19 | KUMASI-CRI |  |  |  |
| NERICA-L 41 | KUMASI-CRI |  |  |  |
| Obolo | KUMASI-CRI |  |  |  |
| Oreire | KUMASI-CRI |  |  |  |
| ORYLUX 6 | KUMASI-CRI |  |  |  |
| SA10-SARI | NYANKPALA-SARI | |  |  |
| SA11-SARI | NYANKPALA-SARI | |  |  |
| SA12-SARI | NYANKPALA-SARI | |  |  |
| SA13-SARI | NYANKPALA-SARI | |  |  |
| SA14-SARI | NYANKPALA-SARI | |  |  |
| SA15-SARI | NYANKPALA-SARI | |  |  |
| SA17-SARI | NYANKPALA-SARI | |  |  |
| SA18-SARI | NYANKPALA-SARI | |  |  |
| SA19-SARI | NYANKPALA-SARI | |  |  |
| SA1-SARI | NYANKPALA-SARI | |  |  |
| SA20-SARI | NYANKPALA-SARI | |  |  |
| SA21-SARI | NYANKPALA-SARI | |  |  |
| SA22-SARI | NYANKPALA-SARI | |  |  |
| SA24-SARI | NYANKPALA-SARI | |  |  |
| SA25-SARI | NYANKPALA-SARI | |  |  |
| SA26-SARI | NYANKPALA-SARI | |  |  |
| SA28-SARI | NYANKPALA-SARI | |  |  |
| SA29-SARI | NYANKPALA-SARI | |  |  |
| SA2-SARI | NYANKPALA-SARI | |  |  |
| SA30-SARI | NYANKPALA-SARI | |  |  |
| SA31-SARI | NYANKPALA-SARI | |  |  |
| SA33-SARI | NYANKPALA-SARI | |  |  |
| SA34-SARI | NYANKPALA-SARI | |  |  |
| SA35-SARI | NYANKPALA-SARI | |  |  |
| SA36-SARI | NYANKPALA-SARI | |  |  |
| SA37-SARI | NYANKPALA-SARI | |  |  |
| SA38-SARI | NYANKPALA-SARI | |  |  |
| SA39-SARI | NYANKPALA-SARI | |  |  |
| SA3-SARI | NYANKPALA-SARI | |  |  |
| SA41-SARI | NYANKPALA-SARI | |  |  |
| SA4-SARI | NYANKPALA-SARI | |  |  |
| SA50-SARI | NYANKPALA-SARI | |  |  |
| SA51-SARI | NYANKPALA-SARI | |  |  |
| SA52-SARI | NYANKPALA-SARI | |  |  |
| SA53-SARI | NYANKPALA-SARI | |  |  |
| SA54-SARI | NYANKPALA-SARI | |  |  |
| SA55-SARI | NYANKPALA-SARI | |  |  |
| SA56-SARI | NYANKPALA-SARI | |  |  |
| SA58-SARI | NYANKPALA-SARI | |  |  |
| SA59-SARI | NYANKPALA-SARI | |  |  |
| SA60-SARI | NYANKPALA-SARI | |  |  |
| SA61-SARI | NYANKPALA-SARI | |  |  |
| SA62-SARI | NYANKPALA-SARI | |  |  |
| SA63-SARI | NYANKPALA-SARI | |  |  |
| SA64-SARI | NYANKPALA-SARI | |  |  |
| SA65-SARI | NYANKPALA-SARI | |  |  |
| SA66-SARI | NYANKPALA-SARI | |  |  |
| SA68-SARI | NYANKPALA-SARI | |  |  |
| SA69-SARI | NYANKPALA-SARI | |  |  |
| SA7-SARI | NYANKPALA-SARI | |  |  |
| SA8-SARI | NYANKPALA-SARI | |  |  |
| SA9-SARI | NYANKPALA-SARI | |  |  |
| SAHEL 210 | KUMASI-CRI |  |  |  |
| SAHEL 134 | KUMASI-CRI |  |  |  |
| SAHEL 177 | KUMASI-CRI |  |  |  |
| SR23364-128-1835-1-HV-1-1 | KAFACI |  |  |  |
| SR23364-128-1907-1-HV-1-1 | KAFACI |  |  |  |
| SR23364-133-171-1-HV-1-1 | KAFACI |  |  |  |
| SR23364-133-17-1-HV-1-2 | KAFACI |  |  |  |
| SR3305F2-60-2-2-HV-1-1 | KAFACI |  |  |  |
| SR33705F2-60-1-1HV-1-1 | KAFACI |  |  |  |
| SR33705F2-60-1-2-HV-1-2 | KAFACI |  |  |  |
| SR33705F2-61-1-3-HV-1-1 | KAFACI |  |  |  |
| SR33705F2-61-3-2-HV-1-1 | KAFACI |  |  |  |
| SR33705F2-67-1-1-HV-1-1 | KAFACI |  |  |  |
| SR34034F3-71-2-1-1-3 | KAFACI |  |  |  |
| SR34042F3-22-1-1-1-3 | KAFACI |  |  |  |
| SR34042F3-22-1-1-5-3 | KAFACI |  |  |  |
| SR34053(#5-52)-1-4-2-10-1-2 | KAFACI |  |  |  |
| SR34053(#5-52)-1-4-2-10-3-1 | KAFACI |  |  |  |
| SR34053(#5-52)-1-4-2-10-3-3 | KAFACI |  |  |  |
| SR34590-HB 3433-5-1-1 | KAFACI |  |  |  |
| SR34590-HB 3433-8-3-1 | KAFACI |  |  |  |
| SR34590-HB3433-1-1-1 | KAFACI |  |  |  |
| SR34590-HB3433-1-3-1 | KAFACI |  |  |  |
| SR34590-HB3433-1-3-1-1 | KAFACI |  |  |  |
| SR34590-HB3433-2-1-1 | KAFACI |  |  |  |
| SR34590-HB3433-3-1-1 | KAFACI |  |  |  |
| SR34590-HB3433-5-1-1 | KAFACI |  |  |  |
| SR34590-HB3433-6-1-1 | KAFACI |  |  |  |
| SR34590-HB3433-6-2-1 | KAFACI |  |  |  |
| SR34590-HB-3433-7-1-1 | KAFACI |  |  |  |
| SR34590-HB3433-7-2-1 | KAFACI |  |  |  |
| SR34590-HB3433-7-3-1 | KAFACI |  |  |  |
| SR34590-HB3433-8-2-1 | KAFACI |  |  |  |
| SR34598-HB-16-HV-1-1 | KAFACI |  |  |  |
| SR34796-1-4-6-3-2-1 | KAFACI |  |  |  |
| SR35230-2-9-2-2 | KAFACI |  |  |  |
| SR35250-1-15-1-1 | KAFACI |  |  |  |
| SR35250-1-23-2-1 | KAFACI |  |  |  |
| SR35250-2-3-1-1 | KAFACI |  |  |  |
| SR35250-2-4-2-3 | KAFACI |  |  |  |
| SR35266-2-11-1-1 | KAFACI |  |  |  |
| SR35266-2-11-1-1-1 | KAFACI |  |  |  |
| SR35266-2-11-4-1 | KAFACI |  |  |  |
| SR35266-2-11-4-1-1 | KAFACI |  |  |  |
| SR35266-2-12-1-1 | KAFACI |  |  |  |
| SR35266-2-12-2-1 | KAFACI |  |  |  |
| SR35266-2-12-4-1 | KAFACI |  |  |  |
| SR35266-2-16-1-1 | KAFACI |  |  |  |
| SR35266-2-16-2-1 | KAFACI |  |  |  |
| SR35266-2-17-1-1 | KAFACI |  |  |  |
| SR35266-2-17-2-1 | KAFACI |  |  |  |
| SR35266-2-18-1-1 | KAFACI |  |  |  |
| SR35266-2-18-2-1 | KAFACI |  |  |  |
| SR35266-2-18-3-1 | KAFACI |  |  |  |
| SR35266-2-19-1-1 | KAFACI |  |  |  |
| SR35266-2-20-1-1 | KAFACI |  |  |  |
| SR35266-2-20-3-1 | KAFACI |  |  |  |
| SR35266-2-20-3-1-1 | KAFACI |  |  |  |
| SR35266-2-4-4-1 | KAFACI |  |  |  |
| SR35266-3-1-3-1 | KAFACI |  |  |  |
| SR35266-3-1-5-1 | KAFACI |  |  |  |
| SR35266-3-2-3-1 | KAFACI |  |  |  |
| SR35266-3-2-4-1 | KAFACI |  |  |  |
| SR35266-3-3-5-1 | KAFACI |  |  |  |
| SR35276-2-4-3-1-1 | KAFACI |  |  |  |
| SR35276-2-4-3-2 | KAFACI |  |  |  |
| SR35276-2-4-3-3 | KAFACI |  |  |  |
| SR35278-1-7-2-2 | KAFACI |  |  |  |
| SR35278-1-7-3-2 | KAFACI |  |  |  |
| SR35278-1-9-2-1 | KAFACI |  |  |  |
| SR35278-1-9-3-1 | KAFACI |  |  |  |
| SR35278-1-9-3-3 | KAFACI |  |  |  |
| SR35278-2-10-1-2 | KAFACI |  |  |  |
| SR35278-2-10-1-3 | KAFACI |  |  |  |
| SR35285-2-8-4-1 | KAFACI |  |  |  |
| SR35300-1-HV-1-2 | KAFACI |  |  |  |
| SR35311-HB3497-4 | KAFACI |  |  |  |
| SR35311-HB3497-87 | KAFACI |  |  |  |
| SR35311-HB3497-88 | KAFACI |  |  |  |
| SR35329-HB3509-91 | KAFACI |  |  |  |
| Tog7291 | KUMASI-CRI |  |  |  |
| Togo Marshall | KUMASI-CRI |  |  |  |
| Toxx3377 | KUMASI-CRI |  |  |  |
| TV1 | KUMASI-CRI |  |  |  |
| TV2 | KUMASI-CRI |  |  |  |
| UPL 30 | KUMASI-CRI |  |  |  |
| UPL 32 | KUMASI-CRI |  |  |  |
| UPL 39 | KUMASI-CRI |  |  |  |
| UPL 44 | KUMASI-CRI |  |  |  |
| UPL 6 | KUMASI-CRI |  |  |  |
| UPL 87 | KUMASI-CRI |  |  |  |
| Viwornor short | KUMASI-CRI |  |  |  |
| WAB 2085-TGR2-WAT4-1-1 | AFRICARICE |  |  |  |
| WAB 2099-WAC1.FKR3-1-TGR1-2 | AFRICARICE |  |  |  |
| WAB 2101-WAC4-1-TGR1-WAT3-5-TGR2 | AFRICARICE |  |  |  |
| WAB 2135-WAC B-2-TGR3-WAT8-3 | AFRICARICE |  |  |  |
| WAB 2138-WAC B-2-TGR2-WAT5-1 | AFRICARICE |  |  |  |
| WAIQ1-SARI | AFRICARICE |  |  |  |

| Table S4A: Pearson's correlation coefficients among measured traits | | | | | | | | |  |  |  |  |  |  |
| --- | --- | --- | --- | --- | --- | --- | --- | --- | --- | --- | --- | --- | --- | --- |
|  |  |  |  |  |  |  |  |  |  |  |  |  |  |  |
|  |  |  |  |  |  |  |  |  |  |  |  |  |  |  |
|  | **GY** | **GW** | **TN** | **PN** | **HGW** | **HD** | **MD** | **PH** | **CL** | **PL** | **GT** | **GL** | **SLEMMAL** | **GLWR** |
| **GY** | 1.00 | 0.96 | 0.85 | 0.93 | 0.96 | -0.98 | -0.98 | 0.42 | 0.49 | 0.42 | 0.74 | 0.39 | 0.39 | 0.45 |
| **GW** | 0.96 | 1.00 | 0.86 | 0.94 | 0.95 | -0.97 | -0.94 | 0.39 | 0.46 | 0.39 | 0.77 | 0.36 | 0.40 | 0.47 |
| **TN** | 0.85 | 0.86 | 1.00 | 0.93 | 0.86 | -0.86 | -0.84 | 0.40 | 0.45 | 0.41 | 0.58 | 0.38 | 0.36 | 0.41 |
| **PN** | 0.93 | 0.94 | 0.93 | 1.00 | 0.91 | -0.92 | -0.93 | 0.36 | 0.42 | 0.36 | 0.62 | 0.34 | 0.32 | 0.39 |
| **HGW** | 0.96 | 0.95 | 0.86 | 0.91 | 1.00 | -0.98 | -0.94 | 0.45 | 0.52 | 0.44 | 0.78 | 0.41 | 0.45 | 0.53 |
| **HD** | -0.98 | -0.97 | -0.86 | -0.92 | -0.98 | 1.00 | 0.96 | -0.44 | -0.51 | -0.43 | -0.75 | -0.40 | -0.42 | -0.49 |
| **MD** | -0.98 | -0.94 | -0.84 | -0.93 | -0.94 | 0.96 | 1.00 | -0.37 | -0.44 | -0.37 | -0.65 | -0.34 | -0.32 | -0.37 |
| **PH** | 0.42 | 0.39 | 0.40 | 0.36 | 0.45 | -0.44 | -0.37 | 1.00 | 0.99 | 0.99 | 0.42 | 0.97 | 0.79 | 0.80 |
| **CL** | 0.49 | 0.46 | 0.45 | 0.42 | 0.52 | -0.51 | -0.44 | 0.99 | 1.00 | 0.97 | 0.45 | 0.95 | 0.78 | 0.80 |
| **PL** | 0.42 | 0.39 | 0.41 | 0.36 | 0.44 | -0.43 | -0.37 | 0.99 | 0.97 | 1.00 | 0.38 | 0.99 | 0.77 | 0.77 |
| **GT** | 0.74 | 0.77 | 0.58 | 0.62 | 0.78 | -0.75 | -0.65 | 0.42 | 0.45 | 0.38 | 1.00 | 0.36 | 0.55 | 0.63 |
| **GL** | 0.39 | 0.36 | 0.38 | 0.34 | 0.41 | -0.40 | -0.34 | 0.97 | 0.95 | 0.99 | 0.36 | 1.00 | 0.74 | 0.77 |
| **SLEMMAL** | 0.39 | 0.40 | 0.36 | 0.32 | 0.45 | -0.42 | -0.32 | 0.79 | 0.78 | 0.77 | 0.55 | 0.74 | 1.00 | 0.93 |
| **GLWR** | 0.45 | 0.47 | 0.41 | 0.39 | 0.53 | -0.49 | -0.37 | 0.80 | 0.80 | 0.77 | 0.63 | 0.77 | 0.93 | 1.00 |
|  |  |  |  |  |  |  |  |  |  |  |  |  |  |  |
|  |  |  |  |  |  |  |  |  |  |  |  |  |  |  |
| Table S4B: Genotypic correlation coefficients among measured traits | | | | | | | | |  |  |  |  |  |  |
|  |  |  |  |  |  |  |  |  |  |  |  |  |  |  |
| **Trait** | **GY** | **GW** | **TN** | **PN** | **HGW** | **HD** | **MD** | **PH** | **CL** | **PL** | **GT** | **GL** | **SLEMMAL** | **GLWR** |
| GY | 1.00 | 0.98 | 0.96 | 0.97 | 0.98 | -0.99 | -0.99 | 0.25 | 0.38 | 0.26 | 0.99 | 0.23 | 0.33 | 0.43 |
| GW | 0.98 | 1.00 | 0.98 | 0.99 | 0.97 | -0.98 | -0.97 | 0.18 | 0.29 | 0.19 | 0.98 | 0.17 | 0.24 | 0.37 |
| TN | 0.96 | 0.98 | 1.00 | 0.98 | 0.97 | -0.97 | -0.94 | 0.22 | 0.33 | 0.23 | 0.99 | 0.21 | 0.20 | 0.35 |
| PN | 0.97 | 0.99 | 0.98 | 1.00 | 0.96 | -0.96 | -0.97 | 0.16 | 0.27 | 0.18 | 0.99 | 0.16 | 0.17 | 0.32 |
| HGW | 0.98 | 0.97 | 0.97 | 0.96 | 1.00 | -0.99 | -0.97 | 0.25 | 0.38 | 0.25 | 1.00 | 0.22 | 0.31 | 0.44 |
| HD | -0.99 | -0.98 | -0.97 | -0.96 | -0.99 | 1.00 | 0.98 | -0.27 | -0.38 | -0.27 | -0.99 | -0.23 | -0.33 | -0.45 |
| MD | -0.99 | -0.97 | -0.94 | -0.97 | -0.97 | 0.98 | 1.00 | -0.22 | -0.34 | -0.23 | -0.99 | -0.19 | -0.27 | -0.36 |
| PH | 0.25 | 0.18 | 0.22 | 0.16 | 0.25 | -0.27 | -0.22 | 1.00 | 0.99 | 0.99 | 0.21 | 0.98 | 0.98 | 0.90 |
| CL | 0.38 | 0.29 | 0.33 | 0.27 | 0.38 | -0.38 | -0.34 | 0.99 | 1.00 | 0.98 | 0.33 | 0.96 | 0.99 | 0.92 |
| PL | 0.26 | 0.19 | 0.23 | 0.18 | 0.25 | -0.27 | -0.23 | 0.99 | 0.98 | 1.00 | 0.21 | 0.99 | 0.98 | 0.91 |
| GT | 0.99 | 0.98 | 0.99 | 0.99 | 1.00 | -0.99 | -0.99 | 0.21 | 0.33 | 0.21 | 1.00 | 0.18 | 0.30 | 0.44 |
| GL | 0.23 | 0.17 | 0.21 | 0.16 | 0.22 | -0.23 | -0.19 | 0.98 | 0.96 | 0.99 | 0.18 | 1.00 | 0.97 | 0.92 |
| SLEMMAL | 0.33 | 0.24 | 0.20 | 0.17 | 0.31 | -0.33 | -0.27 | 0.98 | 0.99 | 0.98 | 0.30 | 0.97 | 1.00 | 0.94 |
| GLWR | 0.43 | 0.37 | 0.35 | 0.32 | 0.44 | -0.45 | -0.36 | 0.90 | 0.92 | 0.91 | 0.44 | 0.92 | 0.94 | 1.00 |

| Table S5: Cos2 values of variables for the first three PCs, the first two of which were significant. | | | | | | | | | | |
| --- | --- | --- | --- | --- | --- | --- | --- | --- | --- | --- |
|  |  |  |  |  |  |  |  |  |  |  |
| **Trait** | **PC1** | **PC2** | **PC3** |  |  |  |  |  |  |  |
| GY | 0.83 | 0.14 | 0.00 |  |  |  |  |  |  |  |
| GW | 0.79 | 0.18 | 0.00 |  |  |  |  |  |  |  |
| TN | 0.73 | 0.15 | 0.02 |  |  |  |  |  |  |  |
| PN | 0.74 | 0.21 | 0.01 |  |  |  |  |  |  |  |
| HGW | 0.84 | 0.13 | 0.00 |  |  |  |  |  |  |  |
| HD | 0.85 | 0.13 | 0.00 |  |  |  |  |  |  |  |
| MD | 0.77 | 0.18 | 0.01 |  |  |  |  |  |  |  |
| PH | 0.40 | 0.57 | 0.02 |  |  |  |  |  |  |  |
| CL | 0.49 | 0.46 | 0.03 |  |  |  |  |  |  |  |
| PL | 0.40 | 0.56 | 0.04 |  |  |  |  |  |  |  |
| GT | 0.68 | 0.06 | 0.18 |  |  |  |  |  |  |  |
| GL | 0.36 | 0.58 | 0.04 |  |  |  |  |  |  |  |
| SLEMMAL | 0.39 | 0.42 | 0.13 |  |  |  |  |  |  |  |
| GLWR | 0.49 | 0.34 | 0.12 |  |  |  |  |  |  |  |
|  |  |  |  |  |  |  |  |  |  |  |

| Table S7: Cluster memberships of the 295 rice genotypes. | | |  |
| --- | --- | --- | --- |
|  |  |  |  |
| **Cluster 1** | **Cluster 2** | **Cluster 3** |  |
| 228 | 644 Gold | AgKE99-56 |  |
| 80 DAYS-SARI | AFRICARICE 4 | AGRA-CRI-LOL-1-11 |  |
| AFRICARICE 6 | AgKE99-32 | AGRA-CRI-LOL-1-7 |  |
| AgKE99-26 | ARICA 3 | AGRA-CRI-LOL-2-7 |  |
| AGRA-CRI-LOL-1-21 | ART1005-21-1-1-1-B | AGRA-SARI |  |
| AGRA-CRI-LOL-2-27 | ART101-99-1-2-B-B | ART75-14-1-2-B-B |  |
| AGRA-CRI-LOL-2-29 | ART105-3-1-2-B-B | ART90-9-1-1-B-B |  |
| ARICA 2 | ART108-2-1-1-B-B | ART93-112-1-1-B-B |  |
| ART100-56-1-1-B-B | ART112-85-1-1-B-B | CRI-1-21-5-12 |  |
| ART100-57-1-2-B-B | ART120-26-1-1-B-B | CRI-AgraRice |  |
| ART112-74-1-1-B-B | ART125-26-1-1-B-B | CRI-Emopa |  |
| ART152-3-1-1-B-B | ART132-35-1-1-B-B | CRI-Kantinka |  |
| ART174-2-1-1-B-B | ART143-150-B-1-B-B | CRI-Mpuntuo |  |
| ART216-133-B-1-B-B | ART216-187-B-1-B-B | CRI-Oboafo |  |
| ART216-149-B-1-B-B | ART350:10-2-1-B | Enapa |  |
| ART216-173-B-1-B-B | ART350:2-4-3-B | FKR 62N |  |
| ART216-212-B-1-B-B | ART350:2-6-1-B | Gigante-SARI |  |
| ART245-1-16-1-B-B | ART387-9-1-1-1-B | IR 84105-B-B-B-TGR4 |  |
| ART245-1-40-1-B-B | ART397-3-2-1-1-B | JKE56-3 |  |
| ART248-1-97-1-B-B | ART478-13-8-1-1-B | JKE56-30 |  |
| ART263-11-B-1-B-B | ART478-8-1-1-1-B | KBR 2 |  |
| ART314-14-B-1-B-B | ART483-10-1-1-1-B | NERICA-L 19 |  |
| ART387-2-1-1-1-0 | ART484-19-1-1-1-B | SA22-SARI |  |
| ART397-12-1-1-1-B | ART58-46-1-1-B-B | SA31-SARI |  |
| ART430-16-1-1-1-5 | ART58-5-1-1-B-B | SA38-SARI |  |
| ART493-16-1-1-1-B | ART64-32-1-1-B-B | SR34042F3-22-1-1-5-3 |  |
| ART64-31-1-1-B-B | ART67-17-1-1-B-B | SR34053(#5-52)-1-4-2-10-1-2 | |
| ART64-55-1-1-B-B | ART67-21-1-2-B-B | SR34590-HB-3433-7-1-1 |  |
| ART71-2-1-1-B-B | ART68-12-1-1-B-B | SR35266-2-12-4-1 |  |
| ART75-30-1-1-B-B | ART71-96-1-1-B-B |  |  |
| ART75-8-1-2-B-B | ART73-69-1-2-B-B |  |  |
| ART79-12-1-1-B-B | ART75-33-1-1-B-B |  |  |
| ART84-35-1-1-B-B | ART75-56-1-2-B-B |  |  |
| ART90-46-1-1-B-B | ART75-57-1-1-B-B |  |  |
| ART98-147-1-1-B-B | ART85-48-1-1-B-B |  |  |
| ART98-4-1-1-B-B | ART90-12-1-1-B-B |  |  |
| BOUKE 189 | Awarema |  |  |
| CRI-1-11-15-21 | BETIA |  |  |
| CRI-1-11-15-5 | CK3 |  |  |
| CRI-AMANKWATIA | CRI-1-11-19-12 |  |  |
| CRI-Dartey | DigJas-78 |  |  |
| Digang | Ex-Baike (Asutware) |  |  |
| DigJas-3 | GR18-SARI |  |  |
| DigJas-61 | HB3519-5 |  |  |
| Gigante | HR32046F1-2-261 |  |  |
| HR32080-HB3567-4 | HR32054F1-1-29-1 |  |  |
| HR32086-HB3569-37 | HR32066F1-4-16-1 |  |  |
| IDSA85 | HR32066F1-4-19-1 |  |  |
| JKE56-12 | HR32067F1-2-14-1 |  |  |
| KAF143 | HR32067F1-3-5-1 |  |  |
| KBR 10 | HR32068F1-3-10-1 |  |  |
| KBR 12 | HR32068F1-4-11-1 |  |  |
| KBR V4 | HR32069F1-1-13-1 |  |  |
| KE40 | HR32069F1-1-18-1 |  |  |
| KE53 | HR32069F1-1-3-1 |  |  |
| N1 | HR32069F1-2-4-1 |  |  |
| NERICA-L 41 | HR32069F1-3-5-1 |  |  |
| SA11-SARI | IDS 85 |  |  |
| SA15-SARI | Japonica 1 |  |  |
| SA18-SARI | Jasmine 85-CRI |  |  |
| SA19-SARI | Jasmine 85-SARI |  |  |
| SA1-SARI | KAF53 |  |  |
| SA21-SARI | Khao Hlanon(AfricaRice) |  |  |
| SA2-SARI | Obolo |  |  |
| SA36-SARI | Oreire |  |  |
| SA3-SARI | ORYLUX 6 |  |  |
| SA4-SARI | SA10-SARI |  |  |
| SA51-SARI | SA12-SARI |  |  |
| SA54-SARI | SA13-SARI |  |  |
| SA61-SARI | SA14-SARI |  |  |
| SA64-SARI | SA17-SARI |  |  |
| SA65-SARI | SA20-SARI |  |  |
| SA66-SARI | SA24-SARI |  |  |
| SA69-SARI | SA25-SARI |  |  |
| SA8-SARI | SA26-SARI |  |  |
| SA9-SARI | SA28-SARI |  |  |
| SAHEL 134 | SA29-SARI |  |  |
| SR23364-133-171-1-HV-1-1 | SA30-SARI |  |  |
| SR33705F2-60-1-1HV-1-1 | SA33-SARI |  |  |
| SR34053(#5-52)-1-4-2-10-3-1 | SA34-SARI |  |  |
| SR34053(#5-52)-1-4-2-10-3-3 | SA35-SARI |  |  |
| SR34590-HB 3433-8-3-1 | SA37-SARI |  |  |
| SR34590-HB3433-3-1-1 | SA39-SARI |  |  |
| SR34590-HB3433-5-1-1 | SA41-SARI |  |  |
| SR34590-HB3433-7-2-1 | SA50-SARI |  |  |
| SR34796-1-4-6-3-2-1 | SA52-SARI |  |  |
| SR35230-2-9-2-2 | SA53-SARI |  |  |
| SR35250-1-15-1-1 | SA55-SARI |  |  |
| SR35266-2-11-1-1-1 | SA56-SARI |  |  |
| SR35266-2-11-4-1-1 | SA58-SARI |  |  |
| SR35266-2-17-2-1 | SA59-SARI |  |  |
| SR35266-2-4-4-1 | SA60-SARI |  |  |
| SR35266-3-1-5-1 | SA62-SARI |  |  |
| SR35266-3-2-3-1 | SA63-SARI |  |  |
| SR35266-3-3-5-1 | SA68-SARI |  |  |
| SR35276-2-4-3-1-1 | SA7-SARI |  |  |
| SR35276-2-4-3-3 | SAHEL 210 |  |  |
| SR35278-1-7-3-2 | SAHEL 177 |  |  |
| SR35329-HB3509-91 | SR23364-128-1835-1-HV-1-1 |  |  |
| Tog7291 | SR23364-128-1907-1-HV-1-1 |  |  |
| Togo Marshall | SR23364-133-17-1-HV-1-2 |  |  |
| Toxx3377 | SR3305F2-60-2-2-HV-1-1 |  |  |
| TV1 | SR33705F2-60-1-2-HV-1-2 |  |  |
| TV2 | SR33705F2-61-1-3-HV-1-1 |  |  |
| Viwornor short | SR33705F2-61-3-2-HV-1-1 |  |  |
|  | SR33705F2-67-1-1-HV-1-1 |  |  |
|  | SR34034F3-71-2-1-1-3 |  |  |
|  | SR34042F3-22-1-1-1-3 |  |  |
|  | SR34590-HB 3433-5-1-1 |  |  |
|  | SR34590-HB3433-1-1-1 |  |  |
|  | SR34590-HB3433-1-3-1 |  |  |
|  | SR34590-HB3433-1-3-1-1 |  |  |
|  | SR34590-HB3433-2-1-1 |  |  |
|  | SR34590-HB3433-6-1-1 |  |  |
|  | SR34590-HB3433-6-2-1 |  |  |
|  | SR34590-HB3433-7-3-1 |  |  |
|  | SR34590-HB3433-8-2-1 |  |  |
|  | SR34598-HB-16-HV-1-1 |  |  |
|  | SR35250-1-23-2-1 |  |  |
|  | SR35250-2-3-1-1 |  |  |
|  | SR35250-2-4-2-3 |  |  |
|  | SR35266-2-11-1-1 |  |  |
|  | SR35266-2-11-4-1 |  |  |
|  | SR35266-2-12-1-1 |  |  |
|  | SR35266-2-12-2-1 |  |  |
|  | SR35266-2-16-1-1 |  |  |
|  | SR35266-2-16-2-1 |  |  |
|  | SR35266-2-17-1-1 |  |  |
|  | SR35266-2-18-1-1 |  |  |
|  | SR35266-2-18-2-1 |  |  |
|  | SR35266-2-18-3-1 |  |  |
|  | SR35266-2-19-1-1 |  |  |
|  | SR35266-2-20-1-1 |  |  |
|  | SR35266-2-20-3-1 |  |  |
|  | SR35266-2-20-3-1-1 |  |  |
|  | SR35266-3-1-3-1 |  |  |
|  | SR35266-3-2-4-1 |  |  |
|  | SR35276-2-4-3-2 |  |  |
|  | SR35278-1-7-2-2 |  |  |
|  | SR35278-1-9-2-1 |  |  |
|  | SR35278-1-9-3-1 |  |  |
|  | SR35278-1-9-3-3 |  |  |
|  | SR35278-2-10-1-2 |  |  |
|  | SR35278-2-10-1-3 |  |  |
|  | SR35285-2-8-4-1 |  |  |
|  | SR35300-1-HV-1-2 |  |  |
|  | SR35311-HB3497-4 |  |  |
|  | SR35311-HB3497-87 |  |  |
|  | SR35311-HB3497-88 |  |  |
|  | UPL 30 |  |  |
|  | UPL 32 |  |  |
|  | UPL 39 |  |  |
|  | UPL 44 |  |  |
|  | UPL 6 |  |  |
|  | UPL 87 |  |  |
|  | WAB 2085-TGR2-WAT4-1-1 |  |  |
|  | WAB 2099-WAC1.FKR3-1-TGR1-2 |  |  |
|  | WAB 2101-WAC4-1-TGR1-WAT3-5-TGR2 | |  |
|  | WAB 2135-WAC B-2-TGR3-WAT8-3 |  |  |
|  | WAB 2138-WAC B-2-TGR2-WAT5-1 |  |  |
|  | WAIQ1-SARI |  |  |
