# Supplementary material for: Multi-Trait Selection Index for the Improvement of Agronomic and Yield Traits in Rice (Oryza sativa L.)
Source: Research Square preprint supplement (doi:10.21203/rs.3.rs-8445346/v1), 2026-01-24
Supplement: Supplementary file 2 [file a1b73cc9929ff8f6d37eeb31.xlsx]

## Sheet: Table S1
Table S1: Institute of origin of the 295 Rice genotypes evaluated
Rice genotypes	Origin
228	KAFACI
644 Gold	KUMASI-CRI
80 DAYS-SARI	NYANKPALA-SARI
AFRICARICE 4	AFRICARICE
AFRICARICE 6	AFRICARICE
AgKE99-26	KUMASI-CRI
AgKE99-32	KUMASI-CRI
AgKE99-56	KUMASI-CRI
AGRA-CRI-LOL-1-11	KUMASI-CRI
AGRA-CRI-LOL-1-21	KUMASI-CRI
AGRA-CRI-LOL-1-7	KUMASI-CRI
AGRA-CRI-LOL-2-27	KUMASI-CRI
AGRA-CRI-LOL-2-29	KUMASI-CRI
AGRA-CRI-LOL-2-7	KUMASI-CRI
AGRA-SARI	NYANKPALA-SARI
ARICA 2	AFRICARICE
ARICA 3	AFRICARICE
ART1005-21-1-1-1-B	AFRICARICE
ART100-56-1-1-B-B	AFRICARICE
ART100-57-1-2-B-B	AFRICARICE
ART101-99-1-2-B-B	AFRICARICE
ART105-3-1-2-B-B	AFRICARICE
ART108-2-1-1-B-B	AFRICARICE
ART112-74-1-1-B-B	AFRICARICE
ART112-85-1-1-B-B	AFRICARICE
ART120-26-1-1-B-B	AFRICARICE
ART125-26-1-1-B-B	AFRICARICE
ART132-35-1-1-B-B	AFRICARICE
ART143-150-B-1-B-B	AFRICARICE
ART152-3-1-1-B-B	AFRICARICE
ART174-2-1-1-B-B	AFRICARICE
ART216-133-B-1-B-B	AFRICARICE
ART216-149-B-1-B-B	AFRICARICE
ART216-173-B-1-B-B	AFRICARICE
ART216-187-B-1-B-B	AFRICARICE
ART216-212-B-1-B-B	AFRICARICE
ART245-1-16-1-B-B	AFRICARICE
ART245-1-40-1-B-B	AFRICARICE
ART248-1-97-1-B-B	AFRICARICE
ART263-11-B-1-B-B	AFRICARICE
ART314-14-B-1-B-B	AFRICARICE
ART350:10-2-1-B	AFRICARICE
ART350:2-4-3-B	AFRICARICE
ART350:2-6-1-B	AFRICARICE
ART387-2-1-1-1-0	AFRICARICE
ART387-9-1-1-1-B	AFRICARICE
ART397-12-1-1-1-B	AFRICARICE
ART397-3-2-1-1-B	AFRICARICE
ART430-16-1-1-1-5	AFRICARICE
ART478-13-8-1-1-B	AFRICARICE
ART478-8-1-1-1-B	AFRICARICE
ART483-10-1-1-1-B	AFRICARICE
ART484-19-1-1-1-B	AFRICARICE
ART493-16-1-1-1-B	AFRICARICE
ART58-46-1-1-B-B	AFRICARICE
ART58-5-1-1-B-B	AFRICARICE
ART64-31-1-1-B-B	AFRICARICE
ART64-32-1-1-B-B	AFRICARICE
ART64-55-1-1-B-B	AFRICARICE
ART67-17-1-1-B-B	AFRICARICE
ART67-21-1-2-B-B	AFRICARICE
ART68-12-1-1-B-B	AFRICARICE
ART71-2-1-1-B-B	AFRICARICE
ART71-96-1-1-B-B	AFRICARICE
ART73-69-1-2-B-B	AFRICARICE
ART75-14-1-2-B-B	AFRICARICE
ART75-30-1-1-B-B	AFRICARICE
ART75-33-1-1-B-B	AFRICARICE
ART75-56-1-2-B-B	AFRICARICE
ART75-57-1-1-B-B	AFRICARICE
ART75-8-1-2-B-B	AFRICARICE
ART79-12-1-1-B-B	AFRICARICE
ART84-35-1-1-B-B	AFRICARICE
ART85-48-1-1-B-B	AFRICARICE
ART90-12-1-1-B-B	AFRICARICE
ART90-46-1-1-B-B	AFRICARICE
ART90-9-1-1-B-B	AFRICARICE
ART93-112-1-1-B-B	AFRICARICE
ART98-147-1-1-B-B	AFRICARICE
ART98-4-1-1-B-B	AFRICARICE
Awarema	KUMASI-CRI
BETIA	KUMASI-CRI
BOUKE 189	KUMASI-CRI
CK3	KUMASI-CRI
CRI-1-11-15-21	KUMASI-CRI
CRI-1-11-15-5	KUMASI-CRI
CRI-1-11-19-12	KUMASI-CRI
CRI-1-21-5-12	KUMASI-CRI
CRI-AgraRice	KUMASI-CRI
CRI-AMANKWATIA	KUMASI-CRI
CRI-Dartey	KUMASI-CRI
CRI-Emopa	KUMASI-CRI
CRI-Kantinka	KUMASI-CRI
CRI-Mpuntuo	KUMASI-CRI
CRI-Oboafo	KUMASI-CRI
Digang	KUMASI-CRI
DigJas-3	KUMASI-CRI
DigJas-61	KUMASI-CRI
DigJas-78	KUMASI-CRI
Enapa	KUMASI-CRI
Ex-Baike (Asutware)	KUMASI-CRI
FKR 62N	KUMASI-CRI
Gigante	KUMASI-CRI
Gigante-SARI	NYANKPALA-SARI
GR18-SARI	NYANKPALA-SARI
HB3519-5	KAFACI
HR32046F1-2-261	KAFACI
HR32054F1-1-29-1	KAFACI
HR32066F1-4-16-1	KAFACI
HR32066F1-4-19-1	KAFACI
HR32067F1-2-14-1	KAFACI
HR32067F1-3-5-1	KAFACI
HR32068F1-3-10-1	KAFACI
HR32068F1-4-11-1	KAFACI
HR32069F1-1-13-1	KAFACI
HR32069F1-1-18-1	KAFACI
HR32069F1-1-3-1	KAFACI
HR32069F1-2-4-1	KAFACI
HR32069F1-3-5-1	KAFACI
HR32080-HB3567-4	KAFACI
HR32086-HB3569-37	KAFACI
IDS 85	NYANKPALA-SARI
IDSA85	KUMASI-CRI
IR 84105-B-B-B-TGR4	AFRICARICE
Japonica 1	KAFACI
Jasmine 85-CRI	KUMASI-CRI
Jasmine 85-SARI	NYANKPALA-SARI
JKE56-12	KUMASI-CRI
JKE56-3	KUMASI-CRI
JKE56-30	KUMASI-CRI
KAF143	KUMASI-CRI
KAF53	KUMASI-CRI
KBR 10	KUMASI-CRI
KBR 12	KUMASI-CRI
KBR 2	KUMASI-CRI
KBR V4	KUMASI-CRI
KE40	KAFACI
KE53	KAFACI
Khao Hlanon(AfricaRice)	AFRICARICE
N1	KUMASI-CRI
NERICA-L 19	KUMASI-CRI
NERICA-L 41	KUMASI-CRI
Obolo	KUMASI-CRI
Oreire	KUMASI-CRI
ORYLUX 6	KUMASI-CRI
SA10-SARI	NYANKPALA-SARI
SA11-SARI	NYANKPALA-SARI
SA12-SARI	NYANKPALA-SARI
SA13-SARI	NYANKPALA-SARI
SA14-SARI	NYANKPALA-SARI
SA15-SARI	NYANKPALA-SARI
SA17-SARI	NYANKPALA-SARI
SA18-SARI	NYANKPALA-SARI
SA19-SARI	NYANKPALA-SARI
SA1-SARI	NYANKPALA-SARI
SA20-SARI	NYANKPALA-SARI
SA21-SARI	NYANKPALA-SARI
SA22-SARI	NYANKPALA-SARI
SA24-SARI	NYANKPALA-SARI
SA25-SARI	NYANKPALA-SARI
SA26-SARI	NYANKPALA-SARI
SA28-SARI	NYANKPALA-SARI
SA29-SARI	NYANKPALA-SARI
SA2-SARI	NYANKPALA-SARI
SA30-SARI	NYANKPALA-SARI
SA31-SARI	NYANKPALA-SARI
SA33-SARI	NYANKPALA-SARI
SA34-SARI	NYANKPALA-SARI
SA35-SARI	NYANKPALA-SARI
SA36-SARI	NYANKPALA-SARI
SA37-SARI	NYANKPALA-SARI
SA38-SARI	NYANKPALA-SARI
SA39-SARI	NYANKPALA-SARI
SA3-SARI	NYANKPALA-SARI
SA41-SARI	NYANKPALA-SARI
SA4-SARI	NYANKPALA-SARI
SA50-SARI	NYANKPALA-SARI
SA51-SARI	NYANKPALA-SARI
SA52-SARI	NYANKPALA-SARI
SA53-SARI	NYANKPALA-SARI
SA54-SARI	NYANKPALA-SARI
SA55-SARI	NYANKPALA-SARI
SA56-SARI	NYANKPALA-SARI
SA58-SARI	NYANKPALA-SARI
SA59-SARI	NYANKPALA-SARI
SA60-SARI	NYANKPALA-SARI
SA61-SARI	NYANKPALA-SARI
SA62-SARI	NYANKPALA-SARI
SA63-SARI	NYANKPALA-SARI
SA64-SARI	NYANKPALA-SARI
SA65-SARI	NYANKPALA-SARI
SA66-SARI	NYANKPALA-SARI
SA68-SARI	NYANKPALA-SARI
SA69-SARI	NYANKPALA-SARI
SA7-SARI	NYANKPALA-SARI
SA8-SARI	NYANKPALA-SARI
SA9-SARI	NYANKPALA-SARI
SAHEL 210	KUMASI-CRI
SAHEL 134	KUMASI-CRI
SAHEL 177	KUMASI-CRI
SR23364-128-1835-1-HV-1-1	KAFACI
SR23364-128-1907-1-HV-1-1	KAFACI
SR23364-133-171-1-HV-1-1	KAFACI
SR23364-133-17-1-HV-1-2	KAFACI
SR3305F2-60-2-2-HV-1-1	KAFACI
SR33705F2-60-1-1HV-1-1	KAFACI
SR33705F2-60-1-2-HV-1-2	KAFACI
SR33705F2-61-1-3-HV-1-1	KAFACI
SR33705F2-61-3-2-HV-1-1	KAFACI
SR33705F2-67-1-1-HV-1-1	KAFACI
SR34034F3-71-2-1-1-3	KAFACI
SR34042F3-22-1-1-1-3	KAFACI
SR34042F3-22-1-1-5-3	KAFACI
SR34053(#5-52)-1-4-2-10-1-2	KAFACI
SR34053(#5-52)-1-4-2-10-3-1	KAFACI
SR34053(#5-52)-1-4-2-10-3-3	KAFACI
SR34590-HB 3433-5-1-1	KAFACI
SR34590-HB 3433-8-3-1	KAFACI
SR34590-HB3433-1-1-1	KAFACI
SR34590-HB3433-1-3-1	KAFACI
SR34590-HB3433-1-3-1-1	KAFACI
SR34590-HB3433-2-1-1	KAFACI
SR34590-HB3433-3-1-1	KAFACI
SR34590-HB3433-5-1-1	KAFACI
SR34590-HB3433-6-1-1	KAFACI
SR34590-HB3433-6-2-1	KAFACI
SR34590-HB-3433-7-1-1	KAFACI
SR34590-HB3433-7-2-1	KAFACI
SR34590-HB3433-7-3-1	KAFACI
SR34590-HB3433-8-2-1	KAFACI
SR34598-HB-16-HV-1-1	KAFACI
SR34796-1-4-6-3-2-1	KAFACI
SR35230-2-9-2-2	KAFACI
SR35250-1-15-1-1	KAFACI
SR35250-1-23-2-1	KAFACI
SR35250-2-3-1-1	KAFACI
SR35250-2-4-2-3	KAFACI
SR35266-2-11-1-1	KAFACI
SR35266-2-11-1-1-1	KAFACI
SR35266-2-11-4-1	KAFACI
SR35266-2-11-4-1-1	KAFACI
SR35266-2-12-1-1	KAFACI
SR35266-2-12-2-1	KAFACI
SR35266-2-12-4-1	KAFACI
SR35266-2-16-1-1	KAFACI
SR35266-2-16-2-1	KAFACI
SR35266-2-17-1-1	KAFACI
SR35266-2-17-2-1	KAFACI
SR35266-2-18-1-1	KAFACI
SR35266-2-18-2-1	KAFACI
SR35266-2-18-3-1	KAFACI
SR35266-2-19-1-1	KAFACI
SR35266-2-20-1-1	KAFACI
SR35266-2-20-3-1	KAFACI
SR35266-2-20-3-1-1	KAFACI
SR35266-2-4-4-1	KAFACI
SR35266-3-1-3-1	KAFACI
SR35266-3-1-5-1	KAFACI
SR35266-3-2-3-1	KAFACI
SR35266-3-2-4-1	KAFACI
SR35266-3-3-5-1	KAFACI
SR35276-2-4-3-1-1	KAFACI
SR35276-2-4-3-2	KAFACI
SR35276-2-4-3-3	KAFACI
SR35278-1-7-2-2	KAFACI
SR35278-1-7-3-2	KAFACI
SR35278-1-9-2-1	KAFACI
SR35278-1-9-3-1	KAFACI
SR35278-1-9-3-3	KAFACI
SR35278-2-10-1-2	KAFACI
SR35278-2-10-1-3	KAFACI
SR35285-2-8-4-1	KAFACI
SR35300-1-HV-1-2	KAFACI
SR35311-HB3497-4	KAFACI
SR35311-HB3497-87	KAFACI
SR35311-HB3497-88	KAFACI
SR35329-HB3509-91	KAFACI
Tog7291	KUMASI-CRI
Togo Marshall	KUMASI-CRI
Toxx3377	KUMASI-CRI
TV1	KUMASI-CRI
TV2	KUMASI-CRI
UPL 30	KUMASI-CRI
UPL 32	KUMASI-CRI
UPL 39	KUMASI-CRI
UPL 44	KUMASI-CRI
UPL 6	KUMASI-CRI
UPL 87	KUMASI-CRI
Viwornor short	KUMASI-CRI
WAB 2085-TGR2-WAT4-1-1	AFRICARICE
WAB 2099-WAC1.FKR3-1-TGR1-2	AFRICARICE
WAB 2101-WAC4-1-TGR1-WAT3-5-TGR2	AFRICARICE
WAB 2135-WAC B-2-TGR3-WAT8-3	AFRICARICE
WAB 2138-WAC B-2-TGR2-WAT5-1	AFRICARICE
WAIQ1-SARI	AFRICARICE

## Sheet: Table S2
Table S2: Genetic variation in observed means of agro-morphological traits among 295 rice genotypes.
																	Table S2: Genotypic Differences across all traits
Grain Yield (t/ha)				Hundred grain weight (g)				Grain thickness (mm)				Grain length (mm)				Grain width (g)				Grain length-to-width ratio				Tiller number				Panicle number				Panicle length (cm)				Heading days (days)				Maturity days (days)				Culm length (cm)				Sterile lemma length (mm)
Rice genotype	Mean	Group		Rice genotype	Mean	Group		Rice genotype	Mean	Group		Rice genotype	Mean	Group		Rice genotype	Mean	Group		Rice genotype	Mean	Group		Rice genotype	Mean	Group		Rice genotype	Mean	Group		Rice genotype	Mean	Group		Rice genotype	Mean	Group		Rice genotype	Mean	Group		Rice genotype	Mean	Group		Rice genotype	Mean
KBR 2	41.4667	a		SA38-SARI	4.6	a		KBR 2	2.79667	a		AgKE99-56	7.62443	a		KBR 2	3.38333	a		Enapa	3.36667	a		ART75-14-1-2-B-B	16.78	a		SA38-SARI	13.78	a		SA38-SARI	34.3364	a		WAB 2085-TGR2-WAT4-1-1	101	a		WAIQ1-SARI	144	a		AgKE99-56	110.003	a		Enapa	4.78333
SA38-SARI	39.9733	a		AgKE99-56	4.3	ab		JKE56-30	2.76667	ab		SA38-SARI	7.58978	ab		SA38-SARI	3.22667	ab		WAIQ1-SARI	3.23333	ab		CRI-AgraRice	16.7233	ab		ART75-14-1-2-B-B	13.5567	ab		AgKE99-56	34.2507	ab		SA52-SARI	101	a		WAB 2085-TGR2-WAT4-1-1	142.667	a		SA38-SARI	108.557	a		KBR 2	3.83333
AgKE99-56	39.7267	a		SR34053(#5-52)-1-4-2-10-1-2	4.2	abc		SA31-SARI	2.72333	abc		AGRA-CRI-LOL-1-11	7.3734	abc		AgKE99-56	3.08333	abc		KBR 2	3.23333	ab		IR 84105-B-B-B-TGR4	15.9467	abc		CRI-AgraRice	13.4467	ab		AGRA-CRI-LOL-1-11	32.4792	abc		SA14-SARI	100.667	ab		SA14-SARI	141.667	ab		AGRA-CRI-LOL-1-11	101.33	ab		WAIQ1-SARI	3.61667
JKE56-30	39.0667	ab		KBR 2	4.16667	abcd		SR34042F3-22-1-1-5-3	2.68333	abc		AGRA-CRI-LOL-2-7	7.35429	abcd		SR34053(#5-52)-1-4-2-10-1-2	3.05667	abcd		AgKE99-56	3.2	ab		SA38-SARI	14.5	abcd		IR 84105-B-B-B-TGR4	13.1667	ab		AGRA-CRI-LOL-2-7	32.2373	abcd		WAIQ1-SARI	100.333	abc		SA52-SARI	141.333	ab		AGRA-CRI-LOL-2-7	101.223	ab		AgKE99-56	3.49667
SR34053(#5-52)-1-4-2-10-1-2	39	abc		SR34590-HB-3433-7-1-1	4.1	abcd		CRI-1-21-5-12	2.43167	abc		AGRA-CRI-LOL-1-7	7.34084	abcd		CRI-Mpuntuo	3.05667	abcd		SA31-SARI	3.06667	abc		SR34590-HB-3433-7-1-1	13.9433	abcde		CRI-Mpuntuo	13	abc		CRI-Mpuntuo	31.9723	abcd		SR33705F2-61-1-3-HV-1-1	99.6667	abcd		SR33705F2-61-1-3-HV-1-1	140.667	ab		CRI-Mpuntuo	100.447	ab		SA31-SARI	3.21333
AGRA-CRI-LOL-1-11	38.5733	abcd		IR 84105-B-B-B-TGR4	4.1	abcd		SR34053(#5-52)-1-4-2-10-1-2	2.42	abc		CRI-Mpuntuo	7.33789	abcde		AGRA-CRI-LOL-2-7	3.02	abcd		SA38-SARI	3.06667	abc		CRI-Mpuntuo	13.89	abcde		AGRA-CRI-LOL-2-7	12.89	abcd		IR 84105-B-B-B-TGR4	31.938	abcd		SA25-SARI	99.3333	abcde		SR23364-133-17-1-HV-1-2	137.333	abc		AGRA-CRI-LOL-1-7	100.333	ab		SA38-SARI	3.16667
AGRA-CRI-LOL-2-7	38.5333	abcd		ART90-9-1-1-B-B	4	abcde		AgKE99-56	2.41667	abc		ART90-9-1-1-B-B	7.33539	abcde		CRI-Kantinka	3.01333	abcd		SR34042F3-22-1-1-5-3	3.03333	abcd		KBR 12	13.78	abcde		AGRA-CRI-LOL-1-7	12.78	abcde		AGRA-CRI-LOL-1-7	31.7754	abcd		SR35278-1-7-2-2	98.3333	abcdef		SR35278-1-7-2-2	137	abcd		CRI-Kantinka	100.223	ab		SR34042F3-22-1-1-5-3	3.13667
AGRA-CRI-LOL-1-7	38.5067	abcd		SA22-SARI	4	abcde		SA38-SARI	2.39667	abc		IR 84105-B-B-B-TGR4	7.30684	abcde		SA2-SARI	3.00667	abcd		SR34053(#5-52)-1-4-2-10-1-2	3.03333	abcd		SR35276-2-4-3-1-1	13.7767	abcde		SA2-SARI	12.7767	abcde		CRI-Kantinka	31.7172	abcd		SA41-SARI	98.3333	abcdef		SA25-SARI	137	abcd		IR 84105-B-B-B-TGR4	100.113	ab		SR34053(#5-52)-1-4-2-10-1-2	3.06167
CRI-Mpuntuo	38.4733	abcd		CRI-Mpuntuo	4	abcde		Enapa	2.36667	abc		CRI-Kantinka	7.30673	abcde		IR 84105-B-B-B-TGR4	3.00667	abcd		ART90-9-1-1-B-B	3.03064	abcd		AGRA-CRI-LOL-2-7	13.5533	abcde		CRI-Kantinka	12.7767	abcde		CRI-Emopa	31.508	abcd		SR35250-2-3-1-1	98	abcdef		SR35250-2-3-1-1	136	abcde		CRI-Emopa	99.5567	abc		AGRA-CRI-LOL-1-11	3.05
CRI-Kantinka	38.3133	abcde		KBR 12	3.98333	abcde		JKE56-3	2.34	abc		CRI-Emopa	7.30604	abcde		Togo Marshall	2.98667	abcd		IR 84105-B-B-B-TGR4	2.93333	abcd		CRI-Kantinka	13.4433	abcde		Togo Marshall	12.7767	abcde		Gigante-SARI	31.364	abcd		SR35278-2-10-1-2	97.6667	abcdef		SR35278-2-10-1-2	135.667	abcdef		Gigante-SARI	98.2233	abcd		AGRA-CRI-LOL-2-7	3.03333
CRI-Emopa	38.24	abcde		AGRA-CRI-LOL-2-7	3.96667	abcdef		SR35266-2-12-4-1	2.33833	abc		Gigante-SARI	7.2891	abcde		SAHEL 134	2.98333	abcd		ART75-14-1-2-B-B	2.93089	abcd		SA2-SARI	13.4433	abcde		SR34590-HB-3433-7-1-1	12.7233	abcde		NERICA-L 19	31.0839	abcd		ART75-56-1-2-B-B	97.6667	abcdef		SA41-SARI	135.333	abcdef		CRI-Oboafo	97.5567	abcd		AGRA-CRI-LOL-1-7	3.02
Gigante-SARI	38.0513	abcdef		CRI-Kantinka	3.96667	abcdef		ART90-9-1-1-B-B	2.26333	abc		CRI-Dartey	7.26919	abcde		AGRA-CRI-LOL-1-7	2.98333	abcd		AGRA-CRI-LOL-1-11	2.9	abcd		Togo Marshall	13.4433	abcde		AgKE99-56	12.7233	abcde		CRI-Oboafo	30.9954	abcd		ART350:10-2-1-B	97.6667	abcdef		SA59-SARI	135	abcdefg		NERICA-L 19	97.2233	abcd		IR 84105-B-B-B-TGR4	3.01667
SA2-SARI	38.0333	abcdef		SA2-SARI	3.96667	abcdef		ART75-14-1-2-B-B	2.24667	abc		CRI-Oboafo	7.26347	abcde		SR34590-HB-3433-7-1-1	2.98	abcd		CRI-AgraRice	2.89686	abcd		AGRA-CRI-LOL-1-7	13.3333	abcde		AGRA-CRI-LOL-1-11	12.67	abcdef		CRI-Dartey	30.9564	abcd		SA59-SARI	97.6667	abcdef		SR35266-2-12-2-1	135	abcdefg		ART90-9-1-1-B-B	97	abcd		CRI-Mpuntuo	3.01333
NERICA-L 19	37.98	abcdef		CRI-AgraRice	3.96667	abcdef		IR 84105-B-B-B-TGR4	2.24667	abc		NERICA-L 19	7.25929	abcde		CRI-Oboafo	2.98	abcd		SR34590-HB-3433-7-1-1	2.86667	abcd		Tog7291	13.3333	abcde		Tog7291	12.6667	abcdef		ART90-9-1-1-B-B	30.9082	abcde		CRI-1-11-19-12	97.6667	abcdef		SA50-SARI	134.667	abcdefg		CRI-Dartey	96.7767	abcd		ART90-9-1-1-B-B	2.99667
SA51-SARI	37.9567	abcdef		Togo Marshall	3.96667	abcdef		CRI-AgraRice	2.22667	abc		ART75-14-1-2-B-B	7.23481	abcde		Tog7291	2.97667	abcd		AGRA-CRI-LOL-2-7	2.86667	abcd		ART112-74-1-1-B-B	13.2233	abcde		SAHEL 134	12.5567	abcdef		FKR 62N	30.809	abcde		SA13-SARI	97.6667	abcdef		SA58-SARI	134.667	abcdefg		FKR 62N	96.6633	abcd		CRI-Kantinka	2.98667
Togo Marshall	37.86	abcdefg		ART75-14-1-2-B-B	3.96667	abcdef		CRI-Mpuntuo	2.22333	abc		SA22-SARI	7.22826	abcde		SA51-SARI	2.97667	abcd		AGRA-CRI-LOL-1-7	2.86667	abcd		CRI-Emopa	13.22	abcde		CRI-Oboafo	12.5567	abcdef		SR34590-HB-3433-7-1-1	30.6588	abcdef		SA35-SARI	97.6667	abcdef		SA35-SARI	134.667	abcdefg		SR34590-HB-3433-7-1-1	95.8367	abcd		ART75-14-1-2-B-B	2.97667
CRI-Oboafo	37.7867	abcdefg		SA51-SARI	3.93333	abcdefg		AGRA-CRI-LOL-2-7	2.22	abc		CRI-AgraRice	7.22736	abcde		NERICA-L 19	2.97333	abcd		SA22-SARI	2.86054	abcd		CRI-Oboafo	13.22	abcde		CRI-Emopa	12.5567	abcdef		ART75-14-1-2-B-B	30.5487	abcdef		SA50-SARI	97.3333	abcdef		SR35311-HB3497-4	134.667	abcdefg		ART75-14-1-2-B-B	95.7767	abcd		CRI-Emopa	2.97
CRI-1-11-15-21	37.7267	abcdefg		Tog7291	3.93333	abcdefg		AGRA-CRI-LOL-1-7	2.22	abc		SR34590-HB-3433-7-1-1	7.20775	abcde		CRI-Emopa	2.97333	abcd		SR35266-2-12-4-1	2.85	abcd		AgKE99-56	13.22	abcde		Gigante-SARI	12.5567	abcdef		CRI-AgraRice	30.4829	abcdef		ART90-12-1-1-B-B	97.3333	abcdef		SA13-SARI	134.333	abcdefg		CRI-AgraRice	95.22	abcd		Gigante-SARI	2.96333
AGRA-CRI-LOL-1-21	37.68	abcdefg		Gigante-SARI	3.93333	abcdefg		AGRA-CRI-LOL-1-11	2.21333	abc		FKR 62N	7.19936	abcdef		JKE56-30	2.97	abcd		JKE56-3	2.83333	abcd		SAHEL 134	13.22	abcde		SA51-SARI	12.5567	abcdef		SA22-SARI	30.4668	abcdef		SA58-SARI	97.3333	abcdef		SR23364-128-1835-1-HV-1-1	134.333	abcdefg		Enapa	94.3367	abcd		SR35266-2-12-4-1	2.95
NERICA-L 41	37.66	abcdefg		AGRA-CRI-LOL-1-7	3.93333	abcdefg		AGRA-SARI	2.21	abc		SA13-SARI	7.18252	abcdef		Gigante-SARI	2.97	abcd		CRI-Mpuntuo	2.83333	abcd		NERICA-L 19	13.22	abcde		NERICA-L 19	12.5567	abcdef		Enapa	30.4542	abcdef		SR35266-2-12-2-1	96.6667	abcdefg		ART75-56-1-2-B-B	133.667	abcdefg		SA13-SARI	94.11	abcd		NERICA-L 19	2.94667
SAHEL 134	37.6133	abcdefgh		CRI-Emopa	3.93333	abcdefg		FKR 62N	2.20667	abc		SA58-SARI	7.17936	abcdef		AGRA-CRI-LOL-1-11	2.94667	abcd		CRI-Emopa	2.83333	abcd		SA51-SARI	13.22	abcde		SR35276-2-4-3-1-1	12.5533	abcdef		SA13-SARI	30.3591	abcdef		SR23364-128-1835-1-HV-1-1	96.6667	abcdefg		SR35266-2-18-3-1	133.667	abcdefg		ART483-10-1-1-1-B	94	abcd		FKR 62N	2.94333
KBR 12	37.6	abcdefgh		NERICA-L 19	3.91667	abcdefg		CRI-Emopa	2.20667	abc		ART483-10-1-1-1-B	7.17708	abcdef		CRI-1-21-5-12	2.946	abcd		CRI-Kantinka	2.83333	abcd		Gigante-SARI	13.1633	abcde		SR34796-1-4-6-3-2-1	12.4467	abcdefg		JKE56-3	30.3543	abcdef		ART478-8-1-1-1-B	96.3333	abcdefg		ART350:10-2-1-B	133.667	abcdefg		SA22-SARI	93.6667	abcd		SA22-SARI	2.93667
AGRA-CRI-LOL-2-27	37.6	abcdefgh		AGRA-CRI-LOL-1-11	3.9	abcdefgh		CRI-Kantinka	2.20333	abc		SA35-SARI	7.15963	abcdef		NERICA-L 41	2.93333	abcd		AGRA-SARI	2.83333	abcd		SR34053(#5-52)-1-4-2-10-1-2	13.1133	abcde		CRI-1-11-15-21	12.4433	abcdefg		ART483-10-1-1-1-B	30.1924	abcdef		SR3305F2-60-2-2-HV-1-1	96.3333	abcdefg		ART90-12-1-1-B-B	133.667	abcdefg		SA50-SARI	93.3333	abcde		CRI-AgraRice	2.93667
AGRA-CRI-LOL-2-29	37.5733	abcdefgh		NERICA-L 41	3.9	abcdefgh		SR34590-HB-3433-7-1-1	2.20333	abc		SA50-SARI	7.1512	abcdef		ART75-14-1-2-B-B	2.92667	abcd		FKR 62N	2.8	abcd		AGRA-CRI-LOL-1-11	13.11	abcde		KBR 12	12.4433	abcdefg		SA58-SARI	30.1883	abcdef		ART68-12-1-1-B-B	96	abcdefgh		UPL 30	133.667	abcdefg		SA58-SARI	93	abcde		SR34590-HB-3433-7-1-1	2.93333
ARICA 2	37.5467	abcdefgh		JKE56-30	3.9	abcdefgh		SA22-SARI	2.20333	abc		SA59-SARI	7.15053	abcdef		SR34796-1-4-6-3-2-1	2.92333	abcd		ART93-112-1-1-B-B	2.8	abcd		SR34796-1-4-6-3-2-1	13.11	abcde		SR34053(#5-52)-1-4-2-10-1-2	12.4433	abcdefg		SA35-SARI	30.052	abcdef		SR23364-133-17-1-HV-1-2	96	abcdefgh		CRI-1-11-19-12	133.667	abcdefg		JKE56-3	92.89	abcde		CRI-Oboafo	2.93
CRI-AMANKWATIA	37.4247	abcdefghi		SR34042F3-22-1-1-5-3	3.9	abcdefgh		Gigante-SARI	2.19	abc		JKE56-3	7.14649	abcdefg		KBR 12	2.92333	abcd		Gigante-SARI	2.76667	abcd		NERICA-L 41	13.0533	abcde		AGRA-CRI-LOL-1-21	12.4433	abcdefg		SA50-SARI	30.0253	abcdef		ART120-26-1-1-B-B	96	abcdefgh		SR35278-2-10-1-3	133.333	abcdefg		SA59-SARI	92.4467	abcde		JKE56-3	2.91333
KBR 10	37.3467	abcdefghi		FKR 62N	3.9	abcdefgh		NERICA-L 19	2.18333	abc		Enapa	7.11969	abcdefg		CRI-AgraRice	2.91667	abcd		NERICA-L 19	2.76667	abcd		KBR 2	13.0033	abcde		NERICA-L 41	12.4433	abcdefg		SA59-SARI	29.9459	abcdef		ART108-2-1-1-B-B	96	abcdefgh		SR3305F2-60-2-2-HV-1-1	133.333	abcdefg		SA35-SARI	92.4433	abcde		AGRA-SARI	2.91333
Tog7291	37.29	abcdefghi		CRI-Oboafo	3.9	abcdefgh		SA2-SARI	2.18333	abc		AGRA-SARI	7.11904	abcdefg		FKR 62N	2.90667	abcd		CRI-Dartey	2.75855	abcd		CRI-1-11-15-21	12.9433	abcde		ARICA 2	12.3867	abcdefg		AGRA-SARI	29.8153	abcdef		SR35311-HB3497-4	96	abcdefgh		ART112-85-1-1-B-B	133	abcdefg		AGRA-SARI	91.7767	abcde		CRI-Dartey	2.90667
SR34796-1-4-6-3-2-1	36.94	abcdefghi		SAHEL 134	3.9	abcdefgh		ART93-112-1-1-B-B	2.18	abc		SA41-SARI	7.10857	abcdefg		CRI-1-11-15-21	2.90333	abcd		SR35230-2-9-2-2	2.73333	abcd		SR35266-2-11-4-1-1	12.89	abcde		CRI-AMANKWATIA	12.3867	abcdefg		SR35278-2-10-1-2	29.7292	abcdef		SA17-SARI	96	abcdefgh		WAB 2135-WAC B-2-TGR3-WAT8-3	133	abcdefg		SR35278-2-10-1-2	91.7233	abcde		ART483-10-1-1-1-B	2.88667
IR 84105-B-B-B-TGR4	36.9267	abcdefghi		KBR 10	3.86667	abcdefghi		Togo Marshall	2.17667	abc		SR35250-2-3-1-1	7.10281	abcdefg		SA22-SARI	2.89867	abcd		ART483-10-1-1-1-B	2.704	abcd		KBR 10	12.8333	abcde		AGRA-CRI-LOL-2-29	12.3867	abcdefg		SA41-SARI	29.5039	abcdef		SR35266-2-18-3-1	95.6667	abcdefgh		SA17-SARI	132.667	abcdefg		WAIQ1-SARI	91.4433	abcdef		SA13-SARI	2.88
N1	36.84	abcdefghi		SR34796-1-4-6-3-2-1	3.86667	abcdefghi		SA51-SARI	2.17333	abc		SR35278-2-10-1-2	7.09774	abcdefg		SA31-SARI	2.898	abcd		ART112-74-1-1-B-B	2.7	abcd		CRI-AMANKWATIA	12.8333	abcde		KBR 2	12.3333	abcdefg		SA14-SARI	29.5018	abcdef		ART112-85-1-1-B-B	95.6667	abcdefgh		SR35250-1-23-2-1	132.333	abcdefg		SA41-SARI	91.22	abcdef		SA58-SARI	2.87
DigJas-3	36.7267	abcdefghi		Enapa	3.86667	abcdefghi		CRI-Oboafo	2.17333	abc		SA14-SARI	7.09059	abcdefg		Enapa	2.89333	abcd		SR35276-2-4-3-1-1	2.7	abcd		ARICA 2	12.78	abcde		ART112-74-1-1-B-B	12.3333	abcdefg		SR35250-2-3-1-1	29.4954	abcdef		SA56-SARI	95.6667	abcdefgh		SR35266-2-20-3-1	132	abcdefg		SR35250-2-3-1-1	90.33	abcdef		SA50-SARI	2.87
SR34590-HB-3433-7-1-1	36.66	abcdefghi		CRI-1-11-15-21	3.86667	abcdefghi		KBR 12	2.16667	abc		SR33705F2-61-3-2-HV-1-1	7.07449	abcdefg		KBR 10	2.89333	abcd		CRI-Oboafo	2.7	abcd		SA64-SARI	12.78	abcde		AGRA-CRI-LOL-2-27	12.33	abcdefg		SA52-SARI	29.4351	abcdef		SA37-SARI	95.6667	abcdefgh		ART68-12-1-1-B-B	132	abcdefg		SR35266-2-12-4-1	90.2233	abcdef		SA59-SARI	2.86
HR32080-HB3567-4	36.64	abcdefghi		CRI-AMANKWATIA	3.85	abcdefghi		CRI-1-11-15-21	2.16667	abc		SA25-SARI	7.07046	abcdefg		SR35276-2-4-3-1-1	2.89	abcd		CRI-1-11-15-21	2.7	abcd		AGRA-CRI-LOL-1-21	12.78	abcde		SA61-SARI	12.2233	abcdefgh		SA25-SARI	29.4168	abcdef		SA10-SARI	95.6667	abcdefgh		SA56-SARI	132	abcdefg		SA25-SARI	90.11	abcdef		SA35-SARI	2.85667
KBR V4	36.6	abcdefghi		ARICA 2	3.83333	abcdefghi		Tog7291	2.16333	abc		ART93-112-1-1-B-B	7.06176	abcdefg		CRI-AMANKWATIA	2.89	abcd		ART71-2-1-1-B-B	2.69586	abcd		N1	12.78	abcde		SR35266-2-11-4-1-1	12.2233	abcdefgh		SR33705F2-61-3-2-HV-1-1	29.3726	abcdef		UPL 30	95.3333	abcdefgh		ART478-8-1-1-1-B	132	abcdefg		SA52-SARI	89.7767	abcdef		SR35278-2-10-1-2	2.83333
SA64-SARI	36.4067	abcdefghij		AGRA-CRI-LOL-1-21	3.83333	abcdefghi		SR35276-2-4-3-1-1	2.16333	abc		SR35278-1-7-2-2	7.05746	abcdefg		ART90-9-1-1-B-B	2.88933	abcd		UPL 39	2.69383	abcd		AGRA-CRI-LOL-2-29	12.78	abcde		JKE56-30	12.2233	abcdefgh		SR33705F2-61-1-3-HV-1-1	29.2809	abcdef		SR35278-2-10-1-3	95	abcdefgh		SR35266-2-12-1-1	132	abcdefg		SR35278-1-7-2-2	89.67	abcdef		SA41-SARI	2.83
FKR 62N	36.3533	abcdefghij		N1	3.83333	abcdefghi		AGRA-CRI-LOL-1-21	2.15667	abc		SA52-SARI	7.05145	abcdefg		SA64-SARI	2.88333	abcd		SA13-SARI	2.68994	abcd		TV1	12.7767	abcde		ART64-31-1-1-B-B	12.22	abcdefgh		SR35278-1-7-2-2	29.2473	abcdef		SR35250-1-23-2-1	95	abcdefgh		ART108-2-1-1-B-B	132	abcdefg		SR33705F2-61-3-2-HV-1-1	89.6133	abcdef		ART93-112-1-1-B-B	2.82667
ART75-14-1-2-B-B	36.3067	abcdefghij		SR35266-2-4-4-1	3.83333	abcdefghi		ARICA 2	2.15333	abc		SR35266-2-12-4-1	7.04778	abcdefg		AGRA-CRI-LOL-2-29	2.88333	abcd		SA50-SARI	2.68138	abcd		AGRA-CRI-LOL-2-27	12.7233	abcde		KBR 10	12.22	abcdefgh		ART93-112-1-1-B-B	28.9992	abcdef		SR35266-2-20-3-1	94.6667	abcdefgh		SA37-SARI	132	abcdefg		SR33705F2-61-1-3-HV-1-1	89.6133	abcdef		SR35250-2-3-1-1	2.82
SR35266-2-11-4-1-1	36.28	abcdefghij		SA64-SARI	3.83333	abcdefghi		NERICA-L 41	2.15333	abc		SR33705F2-61-1-3-HV-1-1	7.04021	abcdefg		AGRA-CRI-LOL-1-21	2.88	abcde		SA58-SARI	2.68021	abcd		SR35266-2-17-2-1	12.72	abcde		CRI-1-11-15-5	12.22	abcdefgh		WAB 2085-TGR2-WAT4-1-1	28.9964	abcdef		SR34590-HB3433-1-3-1	94.6667	abcdefgh		ART120-26-1-1-B-B	132	abcdefg		SA14-SARI	89.4433	abcdef		SA25-SARI	2.81333
CRI-1-11-15-5	36.2647	abcdefghij		AGRA-CRI-LOL-2-27	3.83333	abcdefghi		AGRA-CRI-LOL-2-29	2.15333	abc		SR35266-2-16-1-1	7.01533	abcdefg		SR35266-2-11-4-1-1	2.88	abcde		SA59-SARI	2.68014	abcd		DigJas-3	12.72	abcde		DigJas-61	12.22	abcdefgh		ART132-35-1-1-B-B	28.8338	abcdef		SR35266-2-16-1-1	94.6667	abcdefgh		SA10-SARI	132	abcdefg		CRI-1-11-15-21	89.3367	abcdef		SA14-SARI	2.80667
SA31-SARI	36.1467	abcdefghij		AGRA-CRI-LOL-2-29	3.83333	abcdefghi		AGRA-CRI-LOL-2-27	2.15333	abc		SR33705F2-60-1-2-HV-1-2	6.99734	abcdefg		N1	2.87	abcde		SA35-SARI	2.66874	abcd		KBR V4	12.67	abcde		DigJas-3	12.22	abcdefgh		SR33705F2-60-1-2-HV-1-2	28.6979	abcdef		SR35266-2-18-1-1	94.6667	abcdefgh		SR35266-2-16-1-1	131.833	abcdefg		ART93-112-1-1-B-B	89.1133	abcdef		SR35278-1-7-2-2	2.80667
CRI-AgraRice	36.1467	abcdefghij		SR35266-2-11-4-1-1	3.83333	abcdefghi		CRI-AMANKWATIA	2.15	abc		SR35230-2-9-2-2	6.97154	abcdefg		ARICA 2	2.87	abcde		SR35266-2-16-1-1	2.66667	abcd		Viwornor short	12.67	abcde		HR32080-HB3567-4	12.17	abcdefgh		SA36-SARI	28.587	abcdef		HR32067F1-2-14-1	94.3333	abcdefgh		SR34590-HB3433-1-3-1	131.667	abcdefg		SR33705F2-60-1-2-HV-1-2	89	abcdef		SR33705F2-61-3-2-HV-1-1	2.80333
ART64-31-1-1-B-B	36.14	abcdefghij		Viwornor short	3.8	abcdefghi		SAHEL 134	2.15	abc		WAB 2085-TGR2-WAT4-1-1	6.97061	abcdefg		SR35266-2-17-2-1	2.86333	abcde		SR33705F2-60-1-2-HV-1-2	2.66667	abcd		HR32080-HB3567-4	12.67	abcde		Enapa	12.1133	abcdefgh		SR35266-2-12-4-1	28.5391	abcdef		ART478-13-8-1-1-B	94.3333	abcdefgh		SR35266-2-18-1-1	131.667	abcdefg		WAB 2085-TGR2-WAT4-1-1	88.89	abcdef		SA52-SARI	2.80333
DigJas-61	36.12	abcdefghij		SR35266-2-12-4-1	3.8	abcdefghi		KBR 10	2.14667	abc		ART132-35-1-1-B-B	6.96571	abcdefg		ART93-112-1-1-B-B	2.85667	abcde		SR35266-2-17-2-1	2.66667	abcd		SR34590-HB3433-5-1-1	12.6667	abcde		SR35266-2-17-2-1	12.1133	abcdefgh		SR35266-2-17-2-1	28.5156	abcdef		GR18-SARI	94.3333	abcdefgh		SR35266-2-19-1-1	131.333	abcdefg		ART132-35-1-1-B-B	87.7767	abcdef		SR33705F2-60-1-2-HV-1-2	2.80333
SR35266-2-17-2-1	35.8467	abcdefghij		KBR V4	3.8	abcdefghi		DigJas-3	2.13333	abc		UPL 39	6.95637	abcdefg		AGRA-CRI-LOL-2-27	2.85667	abcde		ART90-46-1-1-B-B	2.6614	abcd		JKE56-30	12.6667	abcde		SA64-SARI	12.11	abcdefgh		SA18-SARI	28.5131	abcdef		ART75-57-1-1-B-B	94.3333	abcdefgh		WAB 2138-WAC B-2-TGR2-WAT5-1	131	abcdefg		SA36-SARI	87.3867	abcdef		SR33705F2-61-1-3-HV-1-1	2.8
ART152-3-1-1-B-B	35.7133	abcdefghij		SR35276-2-4-3-1-1	3.8	abcdefghi		SR34796-1-4-6-3-2-1	2.13333	abc		SR3305F2-60-2-2-HV-1-1	6.95479	abcdefg		DigJas-3	2.85667	abcde		SR35278-2-10-1-2	2.65685	abcd		FKR 62N	12.6667	abcde		ART248-1-97-1-B-B	12.11	abcdefgh		SR35266-2-16-1-1	28.4958	abcdef		WAB 2135-WAC B-2-TGR3-WAT8-3	94.3333	abcdefgh		SA60-SARI	131	abcdefg		SR35230-2-9-2-2	87.3367	abcdef		UPL 39	2.79667
SA61-SARI	35.71	abcdefghij		JKE56-3	3.8	abcdefghi		SR35266-2-17-2-1	2.13	abc		SR35266-2-17-2-1	6.95196	abcdefg		JKE56-3	2.85333	abcde		SA41-SARI	2.64697	abcd		SA61-SARI	12.6633	abcde		TV1	12.11	abcdefgh		UPL 39	28.4473	abcdef		SA68-SARI	94.3333	abcdefgh		SR35278-1-9-3-1	131	abcdefg		SR35266-2-16-1-1	87.3333	abcdef		SR35276-2-4-3-1-1	2.79333
Enapa	35.54	abcdefghij		HR32080-HB3567-4	3.8	abcdefghi		SR35266-2-4-4-1	2.12667	abc		KE40	6.94858	abcdefg		TV1	2.85	abcde		ART112-85-1-1-B-B	2.63758	abcd		CRI-1-11-15-5	12.6133	abcde		N1	12.11	abcdefgh		SR35266-3-1-5-1	28.4207	abcdef		SA60-SARI	94	abcdefgh		SR34034F3-71-2-1-1-3	131	abcdefg		SR35276-2-4-3-1-1	87.2233	abcdef		ART132-35-1-1-B-B	2.78667
CRI-1-21-5-12	35.4767	abcdefghij		DigJas-3	3.8	abcdefghi		N1	2.12667	abc		ART112-85-1-1-B-B	6.94467	abcdefg		KBR V4	2.85	abcde		AGRA-CRI-LOL-1-21	2.63333	abcd		SA65-SARI	12.5567	abcde		SR34590-HB3433-5-1-1	12.11	abcdefgh		KE53	28.3873	abcdef		SR35266-2-12-1-1	94	abcdefgh		SR35311-HB3497-87	131	abcdefg		SR35266-2-17-2-1	87.1133	abcdef		SR35230-2-9-2-2	2.78333
SA65-SARI	35.46	abcdefghij		CRI-1-11-15-5	3.76667	abcdefghi		SA64-SARI	2.12333	abc		KE53	6.94359	abcdefg		SA61-SARI	2.84667	abcde		Tog7291	2.63333	abcd		ART64-31-1-1-B-B	12.5567	abcde		ART152-3-1-1-B-B	12.11	abcdefgh		SR35230-2-9-2-2	28.3211	abcdef		ART58-46-1-1-B-B	94	abcdefgh		SA68-SARI	131	abcdefg		KBR 10	86.8867	abcdef		SR35266-2-17-2-1	2.78
ART93-112-1-1-B-B	35.4533	abcdefghij		SA31-SARI	3.76667	abcdefghi		KBR V4	2.12	abc		SR35266-3-1-5-1	6.93277	abcdefg		SR34042F3-22-1-1-5-3	2.83933	abcde		SA2-SARI	2.63333	abcd		DigJas-61	12.5567	abcde		FKR 62N	12.11	abcdefgh		SA69-SARI	28.284	abcdef		ARICA 3	94	abcdefgh		SR33705F2-61-3-2-HV-1-1	130.667	abcdefg		KBR 2	86.2233	abcdef		SR35266-2-16-1-1	2.77667
ART248-1-97-1-B-B	35.38	abcdefghij		ART93-112-1-1-B-B	3.76667	abcdefghi		ART84-35-1-1-B-B	2.12	abc		ART112-74-1-1-B-B	6.92452	abcdefg		SR35266-2-4-4-1	2.838	abcde		SR34590-HB3433-5-1-1	2.63333	abcd		SR34053(#5-52)-1-4-2-10-3-1	12.5	abcde		AGRA-SARI	12.0033	abcdefgh		KE40	28.2579	abcdef		SR33705F2-61-3-2-HV-1-1	94	abcdefgh		SR35266-2-17-1-1	130.667	abcdefg		UPL 39	86.1133	abcdef		SA36-SARI	2.77667
Viwornor short	35.3467	abcdefghij		DigJas-61	3.75	abcdefghi		HR32080-HB3567-4	2.12	abc		SA36-SARI	6.91676	abcdefg		CRI-1-11-15-5	2.83667	abcde		SR35266-3-1-5-1	2.63333	abcd		Enapa	12.5	abcde		ART93-112-1-1-B-B	12.0033	abcdefgh		ART98-147-1-1-B-B	28.1782	abcdef		ART75-33-1-1-B-B	94	abcdefgh		SR34590-HB 3433-5-1-1	130.667	abcdefg		SR35266-3-1-5-1	85.78	abcdef		WAB 2085-TGR2-WAT4-1-1	2.77
ART90-9-1-1-B-B	35.32	abcdefghij		SA65-SARI	3.73333	abcdefghi		SR34590-HB3433-5-1-1	2.12	abc		CRI-1-11-15-21	6.91634	abcdefg		SR35266-2-12-4-1	2.83333	abcde		Gigante	2.63333	abcd		SA4-SARI	12.5	abcde		Viwornor short	12	abcdefgh		SA15-SARI	28.1654	abcdef		SR34034F3-71-2-1-1-3	93.6667	abcdefgh		ART478-13-8-1-1-B	130.333	abcdefg		KE40	85.6667	abcdef		ART112-74-1-1-B-B	2.76333
SR34042F3-22-1-1-5-3	35.3	abcdefghij		ART64-31-1-1-B-B	3.73333	abcdefghi		ART112-74-1-1-B-B	2.11667	abc		SA18-SARI	6.91519	abcdefg		HR32080-HB3567-4	2.83067	abcde		KE40	2.63333	abcd		SR35266-2-4-4-1	12.4967	abcde		SR35266-2-4-4-1	12	abcdefgh		SR35276-2-4-3-3	28.1559	abcdef		ART350:2-6-1-B	93.6667	abcdefgh		SR34590-HB3433-6-1-1	130.333	abcdefg		SA15-SARI	85.6633	abcdef		CRI-1-11-15-21	2.76333
SA4-SARI	35.2533	abcdefghij		AGRA-SARI	3.73333	abcdefghi		SR35266-2-11-4-1-1	2.11333	abc		SR23364-128-1835-1-HV-1-1	6.90947	abcdefg		AGRA-SARI	2.82333	abcde		HR32086-HB3569-37	2.63333	abcd		JKE56-3	12.4467	abcde		SA65-SARI	12	abcdefgh		ART98-4-1-1-B-B	28.113	abcdef		ART125-26-1-1-B-B	93.3333	abcdefgh		SR34598-HB-16-HV-1-1	130	abcdefg		ART112-74-1-1-B-B	85.61	abcdef		KE40	2.75667
AGRA-SARI	35.2133	abcdefghij		SR35266-2-17-2-1	3.73333	abcdefghi		CRI-1-11-15-5	2.11	abc		SA15-SARI	6.90901	abcdefg		Viwornor short	2.81333	abcde		ART484-19-1-1-1-B	2.63333	abcd		SA54-SARI	12.4467	abcde		SA4-SARI	12	abcdefgh		ART397-12-1-1-1-B	28.0823	abcdef		SA24-SARI	93.3333	abcdefgh		UPL 87	130	abcdefg		SA18-SARI	85.5567	abcdef		SA18-SARI	2.75
TV1	35.02	abcdefghij		CRI-1-21-5-12	3.71667	abcdefghi		ART64-31-1-1-B-B	2.11	abc		SR33705F2-67-1-1-HV-1-1	6.9079	abcdefg		DigJas-61	2.8	abcde		ART132-35-1-1-B-B	2.63333	abcd		Toxx3377	12.4467	abcde		ART174-2-1-1-B-B	12	abcdefgh		SR34590-HB 3433-8-3-1	28.0674	abcdef		SR35266-2-19-1-1	93.3333	abcdefgh		ART75-57-1-1-B-B	130	abcdefg		KE53	85.5567	abcdef		SR35266-3-1-5-1	2.75
SR34053(#5-52)-1-4-2-10-3-1	34.9533	abcdefghij		SA61-SARI	3.7	abcdefghi		DigJas-61	2.11	abc		SA69-SARI	6.90306	abcdefg		Toxx3377	2.79667	abcde		ART478-13-8-1-1-B	2.63333	abcd		ART248-1-97-1-B-B	12.4433	abcde		ART75-30-1-1-B-B	12	abcdefgh		WAIQ1-SARI	28.0236	abcdef		SR34590-HB3433-6-1-1	93.3333	abcdefgh		ARICA 3	130	abcdefg		SA69-SARI	85.4433	abcdef		SA15-SARI	2.75
SA22-SARI	34.92	abcdefghij		TV1	3.7	abcdefghi		SA61-SARI	2.10667	abc		SR35266-2-12-2-1	6.89845	abcdefg		SR34590-HB3433-5-1-1	2.79667	abcde		SR3305F2-60-2-2-HV-1-1	2.63333	abcd		SA22-SARI	12.4433	abcde		KBR V4	12	abcdefgh		SA11-SARI	27.9223	abcdefg		SA20-SARI	93.3333	abcdefgh		ART75-33-1-1-B-B	130	abcdefg		SR34053(#5-52)-1-4-2-10-1-2	85.2233	abcdef		KE53	2.74667
SA54-SARI	34.8933	abcdefghij		SR34590-HB3433-5-1-1	3.68333	abcdefghi		SA65-SARI	2.10333	abc		SR35276-2-4-3-3	6.8774	abcdefg		SA54-SARI	2.79333	abcde		CRI-1-21-5-12	2.63177	abcd		AGRA-SARI	12.4433	abcde		ART245-1-40-1-B-B	12	abcdefgh		ART75-8-1-2-B-B	27.9128	abcdefg		SA26-SARI	93.3333	abcdefgh		ART350:2-6-1-B	130	abcdefg		ART112-85-1-1-B-B	84.89	abcdef		SR3305F2-60-2-2-HV-1-1	2.74333
Digang	34.8277	abcdefghij		SR34053(#5-52)-1-4-2-10-3-1	3.66667	abcdefghi		TV1	2.10333	abc		SR34590-HB 3433-5-1-1	6.87652	abcdefg		ART64-31-1-1-B-B	2.79	abcde		SA25-SARI	2.6279	abcd		ART93-112-1-1-B-B	12.4433	abcde		ART245-1-16-1-B-B	12	abcdefgh		CRI-1-11-15-21	27.8159	abcdefg		SR35311-HB3497-87	93.3333	abcdefgh		WAB 2101-WAC4-1-TGR1-WAT3-5-TGR2	130	abcdefg		SA31-SARI	84.7233	abcdef		ART112-85-1-1-B-B	2.74
228	34.8067	abcdefghij		SA4-SARI	3.66667	abcdefghi		SR35230-2-9-2-2	2.1	abc		KBR 10	6.87598	abcdefg		SA65-SARI	2.79	abcde		SR35266-3-2-3-1	2.62717	abcd		ART152-3-1-1-B-B	12.4433	abcde		Digang	12	abcdefgh		ART112-74-1-1-B-B	27.7991	abcdefg		HR32068F1-3-10-1	93.3333	abcdefgh		SA24-SARI	129.667	abcdefg		SR34590-HB 3433-8-3-1	84.61	abcdef		KBR 10	2.73667
SR35276-2-4-3-1-1	34.76	abcdefghij		SA54-SARI	3.66667	abcdefghi		Viwornor short	2.1	abc		SR34590-HB 3433-8-3-1	6.87532	abcdefg		SR34053(#5-52)-1-4-2-10-3-1	2.77667	abcdef		SA10-SARI	2.62412	abcd		SR35266-2-12-4-1	12.3917	bcde		228	11.9967	abcdefgh		SR3305F2-60-2-2-HV-1-1	27.7894	abcdefg		SR34590-HB3433-1-3-1-1	93.3333	abcdefgh		SR33705F2-60-1-2-HV-1-2	129.667	abcdefg		SA11-SARI	84.5567	abcdef		ART98-147-1-1-B-B	2.73667
ART75-30-1-1-B-B	34.6267	abcdefghij		Toxx3377	3.66667	abcdefghi		ART152-3-1-1-B-B	2.1	abc		Gigante	6.87498	abcdefg		SA4-SARI	2.77667	abcdef		Jasmine 85-SARI	2.62412	abcd		SR34590-HB3433-7-2-1	12.39	bcde		SA9-SARI	11.9433	abcdefghi		ART100-56-1-1-B-B	27.7726	abcdefg		SR35266-2-17-1-1	93.3333	abcdefgh		SA20-SARI	129.667	abcdefg		ART484-19-1-1-1-B	84.5533	abcdef		SA11-SARI	2.73667
SR35329-HB3509-91	34.5533	abcdefghij		ART152-3-1-1-B-B	3.66667	abcdefghi		228	2.09667	abc		SR35278-2-10-1-3	6.87334	abcdefg		SA66-SARI	2.77667	abcdef		SR33705F2-61-3-2-HV-1-1	2.61993	abcd		ART90-9-1-1-B-B	12.3867	bcde		SR34053(#5-52)-1-4-2-10-3-1	11.9433	abcdefghi		Toxx3377	27.7548	abcdefg		SA55-SARI	93.3333	abcdefgh		SA62-SARI	129.667	abcdefg		ART397-12-1-1-1-B	84.5	abcdef		SA69-SARI	2.73667
SR35266-2-4-4-1	34.5233	abcdefghij		SR35230-2-9-2-2	3.63333	abcdefghi		ART493-16-1-1-1-B	2.09667	abc		SR35266-2-11-1-1-1	6.873	abcdefg		ART152-3-1-1-B-B	2.77667	abcdef		SR35250-2-3-1-1	2.61872	abcd		SR35329-HB3509-91	12.3867	bcde		ART90-9-1-1-B-B	11.89	abcdefghi		SR35266-2-11-1-1-1	27.7518	abcdefg		ART105-3-1-2-B-B	93.3333	abcdefgh		SA30-SARI	129.667	abcdefg		SA33-SARI	84.4467	abcdef		ART397-12-1-1-1-B	2.73333
Toxx3377	34.4333	abcdefghij		ART112-74-1-1-B-B	3.6	abcdefghi		ART71-2-1-1-B-B	2.09333	abc		SA3-SARI	6.87261	abcdefg		ART112-74-1-1-B-B	2.76667	abcdef		SA52-SARI	2.61708	abcd		Digang	12.3867	bcde		SA54-SARI	11.89	abcdefghi		ART216-173-B-1-B-B	27.6973	abcdefg		SR34590-HB 3433-5-1-1	93.3333	abcdefgh		UPL 6	129.667	abcdefg		ART98-147-1-1-B-B	84.3367	abcdef		SR34590-HB 3433-8-3-1	2.73333
JKE56-3	34.3933	abcdefghij		SR35329-HB3509-91	3.6	abcdefghi		SA4-SARI	2.09333	abc		ART397-12-1-1-1-B	6.86455	abcdefg		SR35329-HB3509-91	2.76667	abcdef		SR33705F2-61-1-3-HV-1-1	2.61461	abcd		228	12.3367	bcde		JKE56-3	11.89	abcdefghi		TV2	27.6542	abcdefg		SA62-SARI	93	abcdefgh		SA26-SARI	129.667	abcdefg		SR35278-2-10-1-3	84.28	abcdef		ART98-4-1-1-B-B	2.73
ART245-1-40-1-B-B	34.3333	abcdefghij		ART248-1-97-1-B-B	3.6	abcdefghi		CRI-Dartey	2.09333	abc		ART98-147-1-1-B-B	6.86186	abcdefg		Digang	2.76333	abcdef		SR35278-1-7-2-2	2.61195	abcd		SR34042F3-22-1-1-5-3	12.3367	bcde		SA22-SARI	11.89	abcdefghi		KBR 10	27.6511	abcdefg		HR32066F1-4-16-1	93	abcdefgh		HR32069F1-2-4-1	129.667	abcdefg		ART75-8-1-2-B-B	84.1667	abcdef		ART75-8-1-2-B-B	2.73
ART174-2-1-1-B-B	34.32	abcdefghij		ART84-35-1-1-B-B	3.6	abcdefghi		SR34053(#5-52)-1-4-2-10-3-1	2.09333	abc		ART71-2-1-1-B-B	6.85793	abcdefg		ART248-1-97-1-B-B	2.75667	abcdef		SA14-SARI	2.61097	abcd		ART84-35-1-1-B-B	12.3333	bcde		JKE56-12	11.89	abcdefghi		SR34590-HB3433-3-1-1	27.6419	abcdefg		SA30-SARI	93	abcdefgh		GR18-SARI	129.667	abcdefg		Tog7291	84.1133	abcdef		SR35276-2-4-3-3	2.72333
SA66-SARI	34.31	abcdefghij		228	3.6	abcdefghi		ART248-1-97-1-B-B	2.09333	abc		SA11-SARI	6.85736	abcdefg		SR35230-2-9-2-2	2.75333	abcdef		SR33705F2-67-1-1-HV-1-1	2.60933	abcd		SA66-SARI	12.3333	bcde		SA66-SARI	11.89	abcdefghi		SR35276-2-4-3-1-1	27.5992	abcdefg		HR32069F1-2-4-1	93	abcdefgh		SA55-SARI	129.667	abcdefg		SR35266-3-2-3-1	84.1133	abcdef		SR33705F2-67-1-1-HV-1-1	2.72
ART245-1-16-1-B-B	34.3067	abcdefghij		SR34590-HB3433-7-2-1	3.6	abcdefghi		SA54-SARI	2.09333	abc		ART100-56-1-1-B-B	6.85411	abcdefg		ART75-30-1-1-B-B	2.74667	abcdefg		SA37-SARI	2.60903	abcd		SA9-SARI	12.33	bcde		ART216-212-B-1-B-B	11.8867	abcdefghi		ART112-85-1-1-B-B	27.5846	abcdefg		SR35278-1-9-3-1	93	abcdefgh		SR34590-HB3433-1-3-1-1	129.667	abcdefg		SR33705F2-67-1-1-HV-1-1	84.11	abcdef		Toxx3377	2.72
AFRICARICE 6	34.2533	abcdefghij		IDSA85	3.59	abcdefghi		SA66-SARI	2.09	abc		ART216-173-B-1-B-B	6.85409	abcdefg		ART245-1-40-1-B-B	2.74333	abcdefg		SR34590-HB 3433-5-1-1	2.60748	abcd		ART174-2-1-1-B-B	12.33	bcde		AFRICARICE 6	11.8867	abcdefghi		SR35266-3-2-3-1	27.5677	abcdefg		ART397-3-2-1-1-B	93	abcdefgh		HR32067F1-2-14-1	129.333	abcdefg		SR35276-2-4-3-3	83.9967	abcdef		KAF143	2.72
SR34590-HB3433-5-1-1	34.2533	abcdefghij		SR33705F2-60-1-1HV-1-1	3.59	abcdefghi		Toxx3377	2.08667	abc		SR34590-HB3433-3-1-1	6.85402	abcdefg		SA9-SARI	2.74	abcdefg		SR35266-2-11-1-1-1	2.60549	abcd		ART245-1-40-1-B-B	12.33	bcde		ART84-35-1-1-B-B	11.8333	abcdefghi		Viwornor short	27.554	abcdefg		ART484-19-1-1-1-B	92.6667	abcdefghi		ART125-26-1-1-B-B	129.333	abcdefg		SR35266-2-11-1-1-1	83.89	abcdef		ART100-56-1-1-B-B	2.71667
ART112-74-1-1-B-B	34.1467	abcdefghij		Digang	3.58333	abcdefghi		Digang	2.08667	abc		HR32086-HB3569-37	6.85343	abcdefg		ART174-2-1-1-B-B	2.74	abcdefg		SR35278-2-10-1-3	2.60469	abcd		ART245-1-16-1-B-B	12.33	bcde		IDSA85	11.8333	abcdefghi		SR33705F2-67-1-1-HV-1-1	27.5197	abcdefg		WAB 2138-WAC B-2-TGR2-WAT5-1	92.6667	abcdefghi		HR32066F1-4-16-1	129.333	abcdefg		SR34590-HB3433-3-1-1	83.78	abcdef		SR35278-2-10-1-3	2.71667
SR35266-2-12-4-1	34.065	abcdefghij		ART216-212-B-1-B-B	3.56667	abcdefghi		AFRICARICE 6	2.08667	abc		ART98-4-1-1-B-B	6.85336	abcdefg		ART245-1-16-1-B-B	2.74	abcdefg		SA56-SARI	2.60405	abcd		ART75-30-1-1-B-B	12.33	bcde		CRI-1-21-5-12	11.8333	abcdefghi		KAF143	27.4944	abcdefg		HR32046F1-2-261	92.6667	abcdefghi		SR35266-2-20-1-1	129.333	abcdefg		SA3-SARI	83.7767	abcdef		SR35266-2-11-1-1-1	2.71667
ART216-212-B-1-B-B	34.0467	abcdefghij		AFRICARICE 6	3.56667	abcdefghi		SR35329-HB3509-91	2.08667	abc		SR35266-3-2-3-1	6.84941	abcdefg		SR34590-HB3433-7-2-1	2.74	abcdefg		KE53	2.6033	abcd		IDSA85	12.2767	bcde		SR34590-HB3433-7-2-1	11.8333	abcdefghi		ART216-149-B-1-B-B	27.4772	abcdefg		SA33-SARI	92.6667	abcdefghi		SR35276-2-4-3-2	129.333	abcdefg		ART98-4-1-1-B-B	83.6133	abcdef		SR23364-128-1835-1-HV-1-1	2.71667
ART84-35-1-1-B-B	34.0267	abcdefghij		SA66-SARI	3.56667	abcdefghi		IDSA85	2.08333	abc		ART478-13-8-1-1-B	6.84894	abcdefg		ART84-35-1-1-B-B	2.73733	abcdefg		SA15-SARI	2.60168	abcd		CRI-1-21-5-12	12.25	cde		SR35329-HB3509-91	11.78	abcdefghi		SR35278-2-10-1-3	27.4713	abcdefg		HR32069F1-3-5-1	92.6667	abcdefghi		ART58-46-1-1-B-B	129.333	abcdefg		Toxx3377	83.5533	abcdef		SR35266-3-2-3-1	2.71667
SA9-SARI	34	abcdefghij		ART493-16-1-1-1-B	3.56667	abcdefghi		ART245-1-16-1-B-B	2.08333	abc		ART75-8-1-2-B-B	6.84042	abcdefg		IDSA85	2.72	abcdefg		SA11-SARI	2.60103	abcd		ART71-2-1-1-B-B	12.2233	cde		SA31-SARI	11.78	abcdefghi		SA3-SARI	27.4397	abcdefg		SR34598-HB-16-HV-1-1	92.3333	abcdefghi		HR32068F1-3-10-1	129.333	abcdefg		SR3305F2-60-2-2-HV-1-1	83.4467	abcdef		SA3-SARI	2.71333
SR34590-HB3433-7-2-1	33.84	abcdefghij		CRI-Dartey	3.53333	abcdefghi		ART75-30-1-1-B-B	2.08333	abc		SR34053(#5-52)-1-4-2-10-3-3	6.83582	abcdefg		228	2.71667	abcdefg		SA36-SARI	2.601	abcd		ART216-212-B-1-B-B	12.2233	cde		KE53	11.78	abcdefghi		SR35266-2-12-2-1	27.384	abcdefg		SR35266-3-1-3-1	92.3333	abcdefghi		SA34-SARI	129	abcdefg		TV2	83.4433	abcdef		SR34590-HB3433-3-1-1	2.71333
ART100-57-1-2-B-B	33.8133	abcdefghij		SA21-SARI	3.53333	abcdefghi		ART245-1-40-1-B-B	2.08333	abc		Toxx3377	6.83249	abcdefg		SR35276-2-4-3-3	2.71333	abcdefg		SA18-SARI	2.6007	abcd		AFRICARICE 6	12.2233	cde		ART100-57-1-2-B-B	11.78	abcdefghi		BOUKE 189	27.3296	abcdefg		SA63-SARI	92	abcdefghi		SA63-SARI	129	abcdefg		ART100-56-1-1-B-B	83.33	abcdef		TV2	2.71
IDSA85	33.76	abcdefghij		ART75-30-1-1-B-B	3.51667	abcdefghi		ART174-2-1-1-B-B	2.08333	abc		SR35266-3-3-5-1	6.82081	abcdefg		ART100-57-1-2-B-B	2.71333	abcdefg		SA3-SARI	2.60032	abcd		SR35230-2-9-2-2	12.2233	cde		SA15-SARI	11.78	abcdefghi		SR34053(#5-52)-1-4-2-10-3-3	27.2335	abcdefg		SA34-SARI	92	abcdefghi		HR32046F1-2-261	129	abcdefg		ART216-149-B-1-B-B	83.0567	abcdef		ART216-173-B-1-B-B	2.70667
ART263-11-B-1-B-B	33.75	abcdefghij		AgKE99-26	3.5	abcdefghi		ART216-212-B-1-B-B	2.08	abc		TV2	6.81942	abcdefg		SA69-SARI	2.71333	abcdefg		ART216-173-B-1-B-B	2.6	abcd		ART90-46-1-1-B-B	12.2233	cde		ART263-11-B-1-B-B	11.78	abcdefghi		JKE56-12	27.2287	abcdefg		ART64-32-1-1-B-B	92	abcdefghi		SAHEL 177	129	abcdefg		ART216-173-B-1-B-B	83	abcdef		ART216-149-B-1-B-B	2.70667
ART64-55-1-1-B-B	33.6733	abcdefghij		ART245-1-40-1-B-B	3.5	abcdefghi		SR34590-HB3433-7-2-1	2.08	abc		SR23364-128-1907-1-HV-1-1	6.81893	abcdefg		KE53	2.71	abcdefg		ARICA 2	2.6	abcd		SA31-SARI	12.2233	cde		SA69-SARI	11.78	abcdefghi		SR23364-128-1835-1-HV-1-1	27.1596	abcdefgh		UPL 87	92	abcdefghi		SR34590-HB3433-6-2-1	128.667	abcdefg		DigJas-3	83	abcdef		Gigante	2.70333
ART493-16-1-1-1-B	33.5733	abcdefghij		SA9-SARI	3.48333	abcdefghi		SA9-SARI	2.07667	abc		SR35250-1-15-1-1	6.81872	abcdefg		ART64-55-1-1-B-B	2.71	abcdefg		ART216-187-B-1-B-B	2.6	abcd		JKE56-12	12.22	cde		ART64-55-1-1-B-B	11.78	abcdefghi		SR35266-3-3-5-1	27.1368	abcdefgh		ART101-99-1-2-B-B	92	abcdefghi		ART397-3-2-1-1-B	128.667	abcdefg		KAF143	83	abcdef		SR34053(#5-52)-1-4-2-10-3-3	2.70333
80 DAYS-SARI	33.57	abcdefghij		ART174-2-1-1-B-B	3.48333	abcdefghi		SR33705F2-60-1-1HV-1-1	2.07667	abc		Viwornor short	6.81865	abcdefg		ART263-11-B-1-B-B	2.71	abcdefg		SA9-SARI	2.6	abcd		UPL 39	12.22	cde		ART71-2-1-1-B-B	11.7767	abcdefghi		SR35250-1-15-1-1	27.1325	abcdefgh		UPL 6	92	abcdefghi		UPL 32	128.667	abcdefg		SR34053(#5-52)-1-4-2-10-3-3	82.9967	abcdef		SR35266-2-12-2-1	2.7
JKE56-12	33.3533	abcdefghij		ART245-1-16-1-B-B	3.48333	abcdefghi		ART90-46-1-1-B-B	2.07667	abc		ART90-46-1-1-B-B	6.81796	abcdefg		SR33705F2-60-1-1HV-1-1	2.71	abcdefg		SR23364-133-171-1-HV-1-1	2.6	abcd		ART100-57-1-2-B-B	12.1667	cde		SR34042F3-22-1-1-5-3	11.7767	abcdefghi		SR34590-HB 3433-5-1-1	27.1264	abcdefgh		Ex-Baike (Asutware)	92	abcdefghi		ART105-3-1-2-B-B	128.667	abcdefg		SR34042F3-22-1-1-5-3	82.9433	abcdef		ART71-2-1-1-B-B	2.7
SA15-SARI	33.3	abcdefghij		ART71-2-1-1-B-B	3.46667	abcdefghi		ART100-57-1-2-B-B	2.07667	abc		ART216-149-B-1-B-B	6.81504	abcdefg		TV2	2.70667	abcdefg		JKE56-12	2.6	abcd		SR33705F2-60-1-1HV-1-1	12.1667	cde		Toxx3377	11.7767	abcdefghi		Digang	27.112	abcdefgh		ART67-17-1-1-B-B	92	abcdefghi		SA12-SARI	128.333	abcdefg		CRI-1-21-5-12	82.5567	abcdef		Tog7291	2.7
SR33705F2-60-1-1HV-1-1	33.26	abcdefghij		SR35266-3-1-5-1	3.46667	abcdefghi		ART64-55-1-1-B-B	2.07333	abc		BOUKE 189	6.81386	abcdefg		SA15-SARI	2.70667	abcdefg		ART98-147-1-1-B-B	2.6	abcd		SR35278-1-7-3-2	12.1667	cde		ART90-46-1-1-B-B	11.7767	abcdefghi		SA1-SARI	26.9866	abcdefgh		HR32054F1-1-29-1	92	abcdefghi		ART483-10-1-1-1-B	128.333	abcdefg		Gigante	82.5533	abcdef		ART484-19-1-1-1-B	2.7
SA69-SARI	33.1667	abcdefghij		SR35278-1-9-2-1	3.46667	abcdefghi		ART263-11-B-1-B-B	2.07333	abc		ART387-2-1-1-1-0	6.81182	abcdefg		ART216-212-B-1-B-B	2.70333	abcdefgh		ART216-133-B-1-B-B	2.6	abcd		ORYLUX 6	12.1133	cde		CRI-Dartey	11.7233	abcdefghi		SR35329-HB3509-91	26.9845	abcdefgh		ART143-150-B-1-B-B	92	abcdefghi		HR32069F1-3-5-1	128.333	abcdefg		Viwornor short	82.33	abcdef		Viwornor short	2.7
KE53	33.06	abcdefghij		SA19-SARI	3.46667	abcdefghi		644 Gold	2.07	abc		ART484-19-1-1-1-B	6.79933	abcdefgh		80 DAYS-SARI	2.70333	abcdefgh		SA8-SARI	2.6	abcd		SA21-SARI	12.1133	cde		SR23364-133-171-1-HV-1-1	11.7233	abcdefghi		ART430-16-1-1-1-5	26.9764	abcdefgh		ART216-187-B-1-B-B	92	abcdefghi		ART85-48-1-1-B-B	128.333	abcdefg		SR35250-1-15-1-1	82.2767	abcdef		SA33-SARI	2.69667
CRI-Dartey	33.01	abcdefghij		ORYLUX 6	3.43333	abcdefghi		80 DAYS-SARI	2.07	abc		KAF143	6.79928	abcdefgh		SR34590-HB 3433-8-3-1	2.7	abcdefgh		CRI-AMANKWATIA	2.6	abcd		SR35276-2-4-3-3	12.11	cde		SR35266-2-12-4-1	11.7217	abcdefghi		ART245-1-16-1-B-B	26.9207	abcdefgh		ART132-35-1-1-B-B	91.6667	abcdefghi		SR35266-3-1-3-1	128.333	abcdefg		SR34590-HB 3433-5-1-1	82.11	abcdef		BOUKE 189	2.69667
SR34590-HB 3433-8-3-1	32.9333	abcdefghij		SR34590-HB 3433-8-3-1	3.43333	abcdefghi		JKE56-12	2.06667	abc		SR23364-133-171-1-HV-1-1	6.7973	abcdefgh		JKE56-12	2.7	abcdefgh		SR35311-HB3497-88	2.6	abcd		SR23364-133-171-1-HV-1-1	12.11	cde		SR34590-HB 3433-8-3-1	11.67	abcdefghi		ART174-2-1-1-B-B	26.9116	abcdefgh		HR32067F1-3-5-1	91.6667	abcdefghi		Jasmine 85-CRI	128	abcdefg		SA66-SARI	82.11	abcdef		SR35250-1-15-1-1	2.69667
AgKE99-26	32.9133	abcdefghij		JKE56-12	3.43333	abcdefghi		KE53	2.06667	abc		ART216-133-B-1-B-B	6.79586	abcdefgh		SR35278-1-7-3-2	2.69667	abcdefgh		KBR 10	2.6	abcd		KE53	12.11	cde		SA3-SARI	11.67	abcdefghi		ART245-1-40-1-B-B	26.8973	abcdefgh		SA12-SARI	91.6667	abcdefghi		HR32066F1-4-19-1	128	abcdefg		HR32086-HB3569-37	82.11	abcdef		SR34590-HB 3433-5-1-1	2.69333
SA19-SARI	32.84	abcdefghij		ART64-55-1-1-B-B	3.43333	abcdefghi		SR34590-HB 3433-8-3-1	2.06667	abc		SA7-SARI	6.7928	abcdefgh		ART71-2-1-1-B-B	2.69	abcdefgh		SR35250-1-15-1-1	2.6	abcd		CRI-Dartey	12.11	cde		ART216-173-B-1-B-B	11.67	abcdefghi		SA33-SARI	26.8616	abcdefgh		HR32066F1-4-19-1	91.6667	abcdefghi		SAHEL 210	128	abcdefg		SR35266-3-3-5-1	82.11	abcdef		SR35266-3-3-5-1	2.69333
ART314-14-B-1-B-B	32.7467	abcdefghij		ART100-57-1-2-B-B	3.43333	abcdefghi		SA69-SARI	2.06667	abc		SA10-SARI	6.79005	abcdefgh		SA19-SARI	2.69	abcdefgh		644 Gold	2.6	abcd		TV2	12.11	cde		SA18-SARI	11.67	abcdefghi		ART387-2-1-1-1-0	26.8302	abcdefgh		BETIA	91.6667	abcdefghi		ART64-32-1-1-B-B	128	abcdefg		BOUKE 189	81.7767	abcdef		JKE56-12	2.68667
ART430-16-1-1-1-5	32.72	abcdefghij		SA69-SARI	3.43333	abcdefghi		SA15-SARI	2.06667	abc		JKE56-12	6.78959	abcdefgh		SA21-SARI	2.68667	abcdefgh		BOUKE 189	2.6	abcd		SR34590-HB 3433-8-3-1	12.11	cde		ART430-16-1-1-1-5	11.67	abcdefghi		Tog7291	26.8248	abcdefgh		ART483-10-1-1-1-B	91.6667	abcdefghi		SR35300-1-HV-1-2	128	abcdefg		ART478-13-8-1-1-B	81.7767	abcdef		HR32086-HB3569-37	2.68667
SR35276-2-4-3-3	32.6867	abcdefghij		ART263-11-B-1-B-B	3.43333	abcdefghi		ART100-56-1-1-B-B	2.06333	abc		Jasmine 85-SARI	6.78884	abcdefgh		SR23364-133-171-1-HV-1-1	2.68667	abcdefgh		ART100-56-1-1-B-B	2.6	abcd		ART263-11-B-1-B-B	12.11	cde		ART98-4-1-1-B-B	11.67	abcdefghi		ART484-19-1-1-1-B	26.8071	abcdefgh		SAHEL 177	91.6667	abcdefghi		Ex-Baike (Asutware)	128	abcdefg		SR34590-HB3433-1-3-1-1	81.7767	abcdef		ART478-13-8-1-1-B	2.68667
TV2	32.64	abcdefghij		ART90-46-1-1-B-B	3.43333	abcdefghi		ART430-16-1-1-1-5	2.06333	abc		ART430-16-1-1-1-5	6.78437	abcdefgh		ART90-46-1-1-B-B	2.68467	abcdefgh		ART263-11-B-1-B-B	2.6	abcd		SA19-SARI	12.11	cde		80 DAYS-SARI	11.67	abcdefghi		ART216-133-B-1-B-B	26.8015	abcdefgh		SA7-SARI	91.5	abcdefghi		HR32067F1-3-5-1	128	abcdefg		ART71-2-1-1-B-B	81.5567	abcdef		ART216-133-B-1-B-B	2.68333
SA21-SARI	32.62	abcdefghij		SA15-SARI	3.43333	abcdefghi		AgKE99-26	2.06333	abc		SA33-SARI	6.78352	abcdefgh		ART493-16-1-1-1-B	2.684	abcdefgh		ART64-55-1-1-B-B	2.6	abcd		SA15-SARI	12.11	cde		ART314-14-B-1-B-B	11.67	abcdefghi		SA9-SARI	26.7968	abcdefgh		SA39-SARI	91.3333	abcdefghi		BETIA	128	abcdefg		SR34590-HB3433-5-1-1	81.5567	abcdef		Digang	2.68333
ART71-2-1-1-B-B	32.6067	abcdefghij		HR32069F1-1-13-1	3.42333	abcdefghi		SR35276-2-4-3-3	2.06333	abc		SR35276-2-4-3-1-1	6.78239	abcdefgh		CRI-Dartey	2.68067	abcdefgh		AGRA-CRI-LOL-2-29	2.6	abcd		SA69-SARI	12.11	cde		BOUKE 189	11.67	abcdefghi		Gigante	26.7945	abcdefgh		SR35266-2-20-1-1	91.3333	abcdefghi		SA33-SARI	128	abcdefg		JKE56-12	81.4467	abcdef		SA1-SARI	2.68333
SR23364-133-171-1-HV-1-1	32.4733	abcdefghij		SR35276-2-4-3-3	3.41667	abcdefghi		ART314-14-B-1-B-B	2.06333	abc		CRI-1-21-5-12	6.78202	abcdefgh		AFRICARICE 6	2.68	abcdefgh		Togo Marshall	2.6	abcd		ART64-55-1-1-B-B	12.11	cde		SA36-SARI	11.67	abcdefghi		ART75-30-1-1-B-B	26.7855	abcdefgh		SR35276-2-4-3-2	91.3333	abcdefghi		ART67-17-1-1-B-B	128	abcdefg		SR23364-128-1835-1-HV-1-1	81.4467	abcdef		ART75-30-1-1-B-B	2.68
SA36-SARI	32.4267	abcdefghij		KE53	3.41667	abcdefghi		TV2	2.06333	abc		SA8-SARI	6.78186	abcdefgh		SA36-SARI	2.68	abcdefgh		WAB 2085-TGR2-WAT4-1-1	2.6	abcd		80 DAYS-SARI	12.0567	cde		KAF143	11.67	abcdefghi		ART314-14-B-1-B-B	26.7694	abcdefgh		SR33705F2-67-1-1-HV-1-1	91.3333	abcdefghi		ART143-150-B-1-B-B	128	abcdefg		Digang	81.3333	abcdef		CRI-1-21-5-12	2.67833
ART100-56-1-1-B-B	32.36	abcdefghij		TV2	3.41667	abcdefghi		HR32069F1-1-13-1	2.06	abc		Digang	6.78125	abcdefgh		ART314-14-B-1-B-B	2.67333	abcdefgh		KBR 12	2.6	abcd		SR34590-HB3433-7-3-1	12.0567	cde		ART98-147-1-1-B-B	11.67	abcdefghi		HR32086-HB3569-37	26.7397	abcdefgh		WAB 2101-WAC4-1-TGR1-WAT3-5-TGR2	91.3333	abcdefghi		ART216-187-B-1-B-B	128	abcdefg		SA2-SARI	81.2233	abcdef		ART245-1-40-1-B-B	2.67667
SR35230-2-9-2-2	32.32	abcdefghij		SR23364-133-171-1-HV-1-1	3.4	abcdefghi		KE40	2.06	abc		WAIQ1-SARI	6.78108	abcdefgh		SR34053(#5-52)-1-4-2-10-3-3	2.67	abcdefgh		ART397-12-1-1-1-B	2.6	abcd		ART216-173-B-1-B-B	12	cde		SR34053(#5-52)-1-4-2-10-3-3	11.67	abcdefghi		SA19-SARI	26.7154	abcdefgh		SR23364-128-1907-1-HV-1-1	91.3333	abcdefghi		ART484-19-1-1-1-B	127.667	abcdefg		KBR 12	81.2233	abcdef		ART387-2-1-1-1-0	2.67333
KE40	32.2867	abcdefghij		80 DAYS-SARI	3.4	abcdefghi		SA36-SARI	2.06	abc		Tog7291	6.77915	abcdefgh		SA18-SARI	2.66667	abcdefgh		Toxx3377	2.6	abcd		SA18-SARI	12	cde		ART216-149-B-1-B-B	11.67	abcdefghi		SA66-SARI	26.6626	abcdefgh		UPL 32	91.3333	abcdefghi		SR35266-2-11-1-1	127.667	abcdefg		SA1-SARI	81.2233	abcdef		ART174-2-1-1-B-B	2.67333
ART216-149-B-1-B-B	32.2867	abcdefghij		UPL 39	3.4	abcdefghi		SR23364-133-171-1-HV-1-1	2.06	abc		SA31-SARI	6.77895	abcdefgh		KE40	2.66667	abcdefgh		SR35278-1-7-3-2	2.6	abcd		BOUKE 189	12	cde		KE40	11.67	abcdefghi		SR23364-133-171-1-HV-1-1	26.6547	abcdefgh		SAHEL 210	91	abcdefghi		ART71-96-1-1-B-B	127.667	abcdefg		ART216-133-B-1-B-B	81.11	abcdef		ART245-1-16-1-B-B	2.67333
ART216-173-B-1-B-B	32.26	abcdefghij		SR35278-1-7-3-2	3.4	abcdefghi		SA19-SARI	2.06	abc		ART245-1-16-1-B-B	6.77643	abcdefgh		SR35250-1-15-1-1	2.66	abcdefgh		ART245-1-16-1-B-B	2.6	abcd		ART98-4-1-1-B-B	12	cde		SA11-SARI	11.67	abcdefghi		ART478-13-8-1-1-B	26.6307	abcdefgh		Jasmine 85-CRI	91	abcdefghi		HR32054F1-1-29-1	127.667	abcdefg		SR35329-HB3509-91	81.11	abcdef		DigJas-3	2.67333
ART90-46-1-1-B-B	32.2467	abcdefghij		HR32069F1-1-3-1	3.38333	abcdefghi		BOUKE 189	2.05667	abc		SA9-SARI	6.77456	abcdefgh		ART430-16-1-1-1-5	2.66	abcdefgh		SA53-SARI	2.6	abcd		ART98-147-1-1-B-B	12	cde		ART100-56-1-1-B-B	11.67	abcdefghi		SA31-SARI	26.6242	abcdefgh		SR35300-1-HV-1-2	91	abcdefghi		Oreire	127.667	abcdefg		ART90-46-1-1-B-B	81.0033	abcdef		ART90-46-1-1-B-B	2.67333
SR35278-1-7-3-2	32.16	abcdefghij		644 Gold	3.38333	abcdefghi		ART216-173-B-1-B-B	2.05667	abc		ART174-2-1-1-B-B	6.77423	abcdefgh		SA3-SARI	2.65667	abcdefgh		ART98-4-1-1-B-B	2.6	abcd		SA3-SARI	12	cde		ART75-8-1-2-B-B	11.67	abcdefghi		ART100-57-1-2-B-B	26.6022	abcdefgh		ART71-96-1-1-B-B	91	abcdefghi		Awarema	127.667	abcdefg		ART314-14-B-1-B-B	80.89	abcdef		ART314-14-B-1-B-B	2.67333
SA3-SARI	32.1133	abcdefghij		SA36-SARI	3.37167	abcdefghi		ORYLUX 6	2.05667	abc		SA1-SARI	6.7731	abcdefgh		SR34590-HB3433-7-3-1	2.65667	abcdefgh		ART67-17-1-1-B-B	2.6	abcd		SR35250-1-15-1-1	12	cde		SA19-SARI	11.6667	abcdefghi		SR23364-128-1907-1-HV-1-1	26.6002	abcdefgh		Oreire	91	abcdefghi		ART101-99-1-2-B-B	127.333	abcdefg		ART75-30-1-1-B-B	80.89	abcdef		SR23364-128-1907-1-HV-1-1	2.67333
BOUKE 189	32.1	abcdefghij		SR35250-1-15-1-1	3.36667	abcdefghi		ART216-149-B-1-B-B	2.05667	abc		ART245-1-40-1-B-B	6.76617	abcdefgh		ORYLUX 6	2.65333	abcdefgh		SR35329-HB3509-91	2.6	abcd		ART314-14-B-1-B-B	12	cde		SR33705F2-60-1-1HV-1-1	11.6667	abcdefghi		DigJas-3	26.5569	abcdefgh		ART73-69-1-2-B-B	91	abcdefghi		SA39-SARI	127.333	abcdefg		SR35266-2-12-2-1	80.7767	abcdef		SR35329-HB3509-91	2.67
HR32069F1-1-13-1	32.0333	abcdefghij		SR35266-2-11-4-1	3.36667	abcdefghi		SA21-SARI	2.05667	abc		SR35329-HB3509-91	6.76441	abcdefgh		ART216-173-B-1-B-B	2.65333	abcdefgh		AgKE99-32	2.6	abcd		SR34053(#5-52)-1-4-2-10-3-3	12	cde		ART493-16-1-1-1-B	11.6667	abcdefghi		ART64-55-1-1-B-B	26.5241	abcdefgh		IDS 85	91	abcdefghi		SR23364-128-1907-1-HV-1-1	127.333	abcdefg		ART174-2-1-1-B-B	80.7767	abcdef		ART430-16-1-1-1-5	2.67
SA18-SARI	31.9733	abcdefghij		KE40	3.36667	abcdefghi		ART98-147-1-1-B-B	2.05333	abc		SR35278-1-7-3-2	6.76259	abcdefgh		SA11-SARI	2.65333	abcdefgh		SA51-SARI	2.6	abcd		ART430-16-1-1-1-5	12	cde		AgKE99-26	11.6633	abcdefghi		80 DAYS-SARI	26.5163	abcdefgh		SR35266-2-16-2-1	91	abcdefghi		ART73-69-1-2-B-B	127.333	abcdefg		ART245-1-16-1-B-B	80.7767	abcdef		SR23364-133-171-1-HV-1-1	2.66667
SR34053(#5-52)-1-4-2-10-3-3	31.96	abcdefghij		ART314-14-B-1-B-B	3.36667	abcdefghi		SR35278-1-7-3-2	2.05333	abc		SA19-SARI	6.76214	abcdefgh		SR35266-3-3-5-1	2.65333	abcdefgh		SA29-SARI	2.6	abcd		SA36-SARI	12	cde		SA21-SARI	11.5567	abcdefghij		ART263-11-B-1-B-B	26.5058	abcdefgh		SR35266-2-11-1-1	90.6667	abcdefghi		ART350:2-4-3-B	127	abcdefg		ART430-16-1-1-1-5	80.6667	abcdef		SR34590-HB3433-5-1-1	2.66667
SR35278-1-9-2-1	31.9533	abcdefghij		ART430-16-1-1-1-5	3.36667	abcdefghi		SA18-SARI	2.05333	abc		SA66-SARI	6.76078	abcdefgh		AgKE99-26	2.65	abcdefgh		Ex-Baike (Asutware)	2.6	abcd		ART216-149-B-1-B-B	12	cde		ART397-12-1-1-1-B	11.5567	abcdefghij		ART79-12-1-1-B-B	26.4758	abcdefgh		ART350:2-4-3-B	90.6667	abcdefghi		ART1005-21-1-1-1-B	127	abcdefg		SR23364-133-171-1-HV-1-1	80.6667	abcdef		ART79-12-1-1-B-B	2.66333
ORYLUX 6	31.8133	abcdefghij		Gigante	3.36667	abcdefghi		SA3-SARI	2.05333	abc		ART314-14-B-1-B-B	6.76052	abcdefgh		ART100-56-1-1-B-B	2.64667	abcdefgh		SR34590-HB3433-2-1-1	2.6	abcd		KAF143	12	cde		SR35230-2-9-2-2	11.5567	abcdefghij		ART71-2-1-1-B-B	26.4587	abcdefgh		SR34590-HB3433-6-2-1	90.6667	abcdefghi		AgKE99-32	127	abcdefg		ART245-1-40-1-B-B	80.6633	abcdef		SA9-SARI	2.66
SR35250-1-15-1-1	31.7933	abcdefghij		HR32086-HB3569-37	3.36667	abcdefghi		SR34053(#5-52)-1-4-2-10-3-3	2.05333	abc		DigJas-3	6.75969	abcdefgh		BOUKE 189	2.64333	abcdefgh		DigJas-3	2.6	abcd		WAB 2099-WAC1.FKR3-1-TGR1-2	12	cde		ART216-133-B-1-B-B	11.5567	abcdefghij		SR35278-1-7-3-2	26.4173	abcdefgh		SR33705F2-60-1-2-HV-1-2	90.6667	abcdefghi		ART387-9-1-1-1-B	127	abcdefg		ART387-2-1-1-1-0	80.5567	abcdef		SA7-SARI	2.66
ART98-147-1-1-B-B	31.7533	abcdefghij		SA3-SARI	3.36667	abcdefghi		SR35250-1-15-1-1	2.05	abc		ART79-12-1-1-B-B	6.75822	abcdefgh		HR32069F1-1-13-1	2.63667	abcdefgh		AGRA-CRI-LOL-2-27	2.6	abcd		KE40	12	cde		SR35278-1-7-3-2	11.5567	abcdefghij		CRI-1-21-5-12	26.3967	abcdefgh		AgKE99-32	90.6667	abcdefghi		SR33705F2-67-1-1-HV-1-1	127	abcdefg		SA51-SARI	80.4467	abcdef		SA19-SARI	2.66
SA11-SARI	31.7467	abcdefghij		SR34053(#5-52)-1-4-2-10-3-3	3.36667	abcdefghi		SR35278-1-9-2-1	2.05	abc		ART100-57-1-2-B-B	6.75629	abcdefgh		ART98-147-1-1-B-B	2.63333	abcdefgh		SR35266-2-4-4-1	2.6	abcd		ART493-16-1-1-1-B	12	cde		ART58-5-1-1-B-B	11.5533	abcdefghij		SA8-SARI	26.2891	abcdefgh		ART1005-21-1-1-1-B	90.6667	abcdefghi		CK3	127	abcdefg		SA19-SARI	80.22	abcdef		SA8-SARI	2.65667
SR35266-3-3-5-1	31.7	abcdefghij		SR35266-3-3-5-1	3.36667	abcdefghi		ART98-4-1-1-B-B	2.05	abc		SR35266-2-18-1-1	6.75592	abcdefgh		SR35278-1-9-2-1	2.63333	abcdefgh		80 DAYS-SARI	2.6	abcd		SR35285-2-8-4-1	12	cde		HR32069F1-1-13-1	11.5533	abcdefghij		SA7-SARI	26.2634	abcdefgh		ART387-9-1-1-1-B	90.6667	abcdefghi		SR35266-2-16-2-1	127	abcdefg		SA8-SARI	80	abcdef		SA66-SARI	2.65667
ART397-12-1-1-1-B	31.66	abcdefghij		SA18-SARI	3.34333	abcdefghi		ART397-12-1-1-1-B	2.05	abc		SR34042F3-22-1-1-5-3	6.75069	abcdefgh		ART216-149-B-1-B-B	2.63333	abcdefgh		TV2	2.6	abcd		ART100-56-1-1-B-B	12	cde		644 Gold	11.4967	abcdefghij		SR34042F3-22-1-1-5-3	26.2629	abcdefgh		Awarema	90.6667	abcdefghi		IDS 85	127	abcdefg		ART84-35-1-1-B-B	80	abcdef		SR35278-1-7-3-2	2.65667
ART75-8-1-2-B-B	31.64	abcdefghij		HR32068F1-4-11-1	3.33333	abcdefghi		SR35266-3-3-5-1	2.05	abc		SR34590-HB3433-7-3-1	6.74935	abcdefgh		SR34590-HB3433-3-1-1	2.63	abcdefgh		HR32066F1-4-19-1	2.6	abcd		ART75-8-1-2-B-B	12	cde		HR32069F1-1-3-1	11.4467	abcdefghijk		HR32069F1-1-18-1	26.1726	abcdefgh		CK3	90.6667	abcdefghi		SR34590-HB3433-8-2-1	126.667	abcdefg		SA9-SARI	79.89	abcdef		ART64-55-1-1-B-B	2.65333
ART98-4-1-1-B-B	31.5933	abcdefghij		ART216-173-B-1-B-B	3.33333	abcdefghi		Gigante	2.05	abc		ART64-55-1-1-B-B	6.74674	abcdefgh		KAF143	2.62667	abcdefgh		SR34590-HB3433-3-1-1	2.6	abcd		SA11-SARI	12	cde		SA8-SARI	11.4467	abcdefghijk		KBR 2	26.013	abcdefgh		HR32069F1-1-18-1	90.3333	abcdefghi		SA7-SARI	126.667	abcdefg		ART79-12-1-1-B-B	79.89	abcdef		ART263-11-B-1-B-B	2.65333
HR32069F1-1-3-1	31.4667	abcdefghij		BOUKE 189	3.33333	abcdefghi		HR32086-HB3569-37	2.05	abc		SA37-SARI	6.74623	abcdefgh		ART75-8-1-2-B-B	2.62333	abcdefgh		ART174-2-1-1-B-B	2.6	abcd		HR32069F1-1-13-1	11.9967	cde		SA1-SARI	11.4467	abcdefghijk		SR35266-2-18-1-1	26.0052	abcdefgh		ART67-21-1-2-B-B	90.3333	abcdefghi		UPL 39	126.667	abcdefg		ART100-57-1-2-B-B	79.8333	abcdef		HR32069F1-1-18-1	2.65333
ART58-5-1-1-B-B	31.36	abcdefghij		SR35266-2-11-1-1-1	3.33333	abcdefghi		ART75-8-1-2-B-B	2.05	abc		80 DAYS-SARI	6.74269	abcdefgh		SR35285-2-8-4-1	2.62267	abcdefgh		SR35266-2-18-1-1	2.6	abcd		ART397-12-1-1-1-B	11.9433	cde		SR35276-2-4-3-3	11.4433	abcdefghijk		ART90-46-1-1-B-B	25.9589	abcdefgh		Khao Hlanon(AfricaRice)	90.3333	abcdefghi		SR35278-1-9-3-3	126.667	abcdefg		SR35278-1-7-3-2	79.78	abcdef		ART100-57-1-2-B-B	2.65333
SR35266-3-1-5-1	31.2733	abcdefghij		Obolo	3.33333	abcdefghi		ART216-133-B-1-B-B	2.04667	abc		ART263-11-B-1-B-B	6.74241	abcdefgh		ART58-5-1-1-B-B	2.62	abcdefgh		SR35276-2-4-3-3	2.6	abcd		SR35278-1-9-2-1	11.9433	cde		ART387-2-1-1-1-0	11.4433	abcdefghijk		SR34590-HB3433-1-3-1-1	25.9204	abcdefgh		KAF53	90.3333	abcdefghi		UPL 44	126.667	abcdefg		ART263-11-B-1-B-B	79.6667	abcdef		80 DAYS-SARI	2.65
KAF143	31.26	abcdefghij		SR34590-HB3433-3-1-1	3.33333	abcdefghi		SA11-SARI	2.04667	abc		ART75-30-1-1-B-B	6.73779	abcdefgh		ART397-12-1-1-1-B	2.62	abcdefgh		Digang	2.6	abcd		644 Gold	11.9433	cde		ORYLUX 6	11.4433	abcdefghijk		SR34590-HB3433-5-1-1	25.8787	abcdefgh		AFRICARICE 4	90.3333	abcdefghi		SR35311-HB3497-88	126.667	abcdefg		AGRA-CRI-LOL-1-21	79.5533	abcdef		Jasmine 85-SARI	2.64667
SR34590-HB3433-7-3-1	31.2333	abcdefghij		SA11-SARI	3.33333	abcdefghi		HR32069F1-1-3-1	2.04667	abc		HR32069F1-1-18-1	6.73472	abcdefgh		ART98-4-1-1-B-B	2.62	abcdefgh		SR34042F3-22-1-1-1-3	2.6	abcd		HR32069F1-1-3-1	11.89	cdef		TV2	11.4433	abcdefghijk		SR35266-2-18-3-1	25.8213	abcdefgh		SR34590-HB3433-8-2-1	90	abcdefghi		ART67-21-1-2-B-B	126.667	abcdefg		Togo Marshall	79.5533	abcdef		SA10-SARI	2.64
ART216-133-B-1-B-B	31.1867	abcdefghij		HB3519-5	3.33333	abcdefghi		SR34590-HB3433-7-3-1	2.04667	abc		ART216-187-B-1-B-B	6.72249	abcdefgh		SA8-SARI	2.61667	abcdefgh		ART430-16-1-1-1-5	2.6	abcd		ART216-133-B-1-B-B	11.89	cdef		SR35278-1-9-2-1	11.4433	abcdefghijk		SR34590-HB3433-7-3-1	25.8195	abcdefgh		ART85-48-1-1-B-B	90	abcdefghi		SR35266-3-2-4-1	126.667	abcdefg		SR35266-2-18-3-1	79.5533	abcdef		SR35266-2-18-3-1	2.64
SR34590-HB3433-3-1-1	31.17	abcdefghij		ART100-56-1-1-B-B	3.33333	abcdefghi		SR34590-HB3433-3-1-1	2.04333	abc		SA56-SARI	6.7187	abcdefgh		WAB 2099-WAC1.FKR3-1-TGR1-2	2.61667	abcdefgh		SR34053(#5-52)-1-4-2-10-3-3	2.6	abcd		AgKE99-26	11.89	cdef		SR34590-HB3433-7-3-1	11.4433	abcdefghijk		SR34053(#5-52)-1-4-2-10-1-2	25.7391	abcdefgh		Jasmine 85-SARI	89.6667	abcdefghi		Khao Hlanon(AfricaRice)	126.667	abcdefg		AGRA-CRI-LOL-2-27	79.5533	abcdef		SR35266-2-18-1-1	2.64
644 Gold	31.0067	abcdefghij		SR34590-HB3433-1-1-1	3.33333	abcdefghi		ART58-5-1-1-B-B	2.04333	abc		ART67-17-1-1-B-B	6.71359	abcdefgh		HR32069F1-1-3-1	2.606	abcdefghi		SR35285-2-8-4-1	2.6	abcd		SA8-SARI	11.89	cdef		HR32068F1-4-11-1	11.39	abcdefghijk		SA10-SARI	25.7369	abcdefgh		SR35266-3-2-4-1	89.6667	abcdefghi		ART132-35-1-1-B-B	126.333	abcdefg		AGRA-CRI-LOL-2-29	79.4767	abcdef		SR34590-HB3433-1-3-1-1	2.63667
Gigante	30.9933	abcdefghij		ART58-5-1-1-B-B	3.33333	abcdefghi		ART387-2-1-1-1-0	2.04	abc		SR35300-1-HV-1-2	6.70752	abcdefgh		ART216-133-B-1-B-B	2.60333	abcdefghi		SR34590-HB 3433-8-3-1	2.6	abcd		SR34590-HB3433-3-1-1	11.89	cdef		HB3519-5	11.39	abcdefghijk		Jasmine 85-SARI	25.6521	abcdefgh		Japonica 1	89.6667	abcdefghi		KAF53	126.333	abcdefg		ART64-55-1-1-B-B	79.4467	abcdef		SA37-SARI	2.63333
ART387-2-1-1-1-0	30.9867	abcdefghij		SR34590-HB3433-7-3-1	3.33333	abcdefghi		ART79-12-1-1-B-B	2.04	abc		SAHEL 210	6.70151	abcdefgh		SR34590-HB3433-1-1-1	2.60333	abcdefghi		Viwornor short	2.6	abcd		ART58-5-1-1-B-B	11.89	cdef		Gigante	11.3867	abcdefghijk		SA37-SARI	25.575	abcdefgh		DigJas-78	89.3333	abcdefghi		SR35285-2-8-4-1	126	abcdefg		ARICA 2	79.3333	abcdef		SA2-SARI	2.63333
ART79-12-1-1-B-B	30.84	abcdefghij		ART216-149-B-1-B-B	3.33333	abcdefghi		KAF143	2.04	abc		Ex-Baike (Asutware)	6.68857	abcdefgh		SA1-SARI	2.592	abcdefghij		ART1005-21-1-1-1-B	2.6	abcd		SR35266-3-3-5-1	11.89	cdef		SR35266-3-1-5-1	11.3333	abcdefghijk		SAHEL 210	25.3847	abcdefgh		SA29-SARI	89.3333	abcdefghi		SA53-SARI	126	abcdefg		80 DAYS-SARI	79.33	abcdef		SR34590-HB3433-7-3-1	2.63333
SR34590-HB3433-1-1-1	30.8	abcdefghij		ART98-147-1-1-B-B	3.31667	abcdefghi		UPL 39	2.03667	abc		SA17-SARI	6.68747	abcdefgh		SR35266-3-1-5-1	2.59133	abcdefghij		ART216-149-B-1-B-B	2.6	abcd		UPL 44	11.89	cdef		SR34590-HB3433-3-1-1	11.3333	abcdefghijk		SA61-SARI	25.3547	abcdefgh		SA53-SARI	89.3333	abcdefghi		SA29-SARI	126	abcdefg		CRI-AMANKWATIA	79.1667	abcdef		KBR 12	2.62667
SA8-SARI	30.7667	abcdefghij		SR35266-2-18-2-1	3.30833	bcdefghi		SA8-SARI	2.03667	abc		BETIA	6.68595	abcdefgh		SR34590-HB3433-2-1-1	2.59	abcdefghij		ART64-32-1-1-B-B	2.6	abcd		SA1-SARI	11.89	cdef		HR32086-HB3569-37	11.3333	abcdefghijk		SR35311-HB3497-4	25.3387	abcdefgh		SR35250-2-4-2-3	89.3333	abcdefghi		WAB 2099-WAC1.FKR3-1-TGR1-2	126	abcdefg		NERICA-L 41	79.0567	abcdef		SAHEL 210	2.62667
HR32086-HB3569-37	30.7667	abcdefghij		SA8-SARI	3.3	bcdefghi		HB3519-5	2.03333	abc		SR34590-HB3433-5-1-1	6.6858	abcdefgh		SR35278-1-9-3-3	2.59	abcdefghij		SR35278-1-9-3-3	2.6	abcd		SR34590-HB3433-1-1-1	11.8867	cdef		CK3	11.33	abcdefghijk		SA2-SARI	25.3211	abcdefgh		ART79-12-1-1-B-B	89.3333	abcdefghi		SR35250-2-4-2-3	126	abcdefg		SR23364-128-1907-1-HV-1-1	78.89	abcdef		SA56-SARI	2.62333
HB3519-5	30.62	abcdefghij		SA28-SARI	3.3	bcdefghi		HR32068F1-4-11-1	2.03333	abc		SA53-SARI	6.68519	abcdefgh		SR34042F3-22-1-1-1-3	2.58667	abcdefghij		ART314-14-B-1-B-B	2.6	abcd		SR35266-3-1-5-1	11.8333	cdef		ART79-12-1-1-B-B	11.33	abcdefghijk		SR35300-1-HV-1-2	25.2625	abcdefgh		SR35311-HB3497-88	89.3333	abcdefghi		SR34590-HB3433-2-1-1	126	abcdefg		SA7-SARI	78.3617	abcdef		644 Gold	2.62
HR32068F1-4-11-1	30.4467	abcdefghij		ART98-4-1-1-B-B	3.3	bcdefghi		Obolo	2.03333	abc		SR35250-2-4-2-3	6.67829	abcdefgh		SR35311-HB3497-88	2.58667	abcdefghij		SA1-SARI	2.6	abcd		Gigante	11.8333	cdef		ART67-21-1-2-B-B	11.33	abcdefghijk		SA56-SARI	25.2523	abcdefgh		SR35278-1-9-3-3	89.3333	abcdefghi		SR34042F3-22-1-1-1-3	126	abcdefg		SR34590-HB3433-7-3-1	78.2233	abcdef		SA17-SARI	2.61333
SA1-SARI	30.44	abcdefghij		Japonica 1	3.3	bcdefghi		SR35266-3-1-5-1	2.03333	abc		SA29-SARI	6.67751	abcdefgh		SR35266-2-11-4-1	2.58467	abcdefghij		ART75-30-1-1-B-B	2.6	abcd		ART387-2-1-1-1-0	11.78	cdef		SR35250-1-15-1-1	11.33	abcdefghijk		SR34590-HB3433-1-1-1	25.1706	abcdefgh		SR34042F3-22-1-1-1-3	89.3333	abcdefghi		HR32069F1-1-18-1	125.667	abcdefg		SR35311-HB3497-4	77.7767	abcdef		SR35300-1-HV-1-2	2.61
SR35285-2-8-4-1	30.4133	abcdefghij		ART397-12-1-1-1-B	3.3	bcdefghi		DigJas-78	2.03333	abc		ART64-32-1-1-B-B	6.67589	abcdefgh		ART387-2-1-1-1-0	2.58333	abcdefghij		SR35266-3-3-5-1	2.6	abcd		SR35266-2-11-4-1	11.78	cdef		DigJas-78	11.33	abcdefghijk		ART67-17-1-1-B-B	25.1639	abcdefgh		SR34590-HB3433-2-1-1	89.3333	abcdefghi		SR35266-2-20-3-1-1	125.667	abcdefg		SAHEL 210	77.6667	abcdef		SA51-SARI	2.60667
SR35266-2-11-1-1-1	30.38	abcdefghij		KAF143	3.3	bcdefghi		SR34590-HB3433-1-1-1	2.03333	abc		KBR 2	6.67571	abcdefgh		Gigante	2.58333	abcdefghij		SA69-SARI	2.6	abcd		SR34590-HB3433-2-1-1	11.78	cdef		ART1005-21-1-1-1-B	11.33	abcdefghijk		SA17-SARI	25.1596	abcdefgh		SR35266-2-18-2-1	89.3333	abcdefghi		DigJas-78	125.333	abcdefg		SA61-SARI	77.5567	abcdef		ART216-187-B-1-B-B	2.6
DigJas-78	30.3133	abcdefghij		Jasmine 85-SARI	3.3	bcdefghi		SR34042F3-22-1-1-1-3	2.03	abc		ART58-5-1-1-B-B	6.67261	abcdefgh		UPL 44	2.58333	abcdefghij		SR23364-128-1907-1-HV-1-1	2.6	abcd		SR35266-3-2-4-1	11.78	cdef		ART350:2-4-3-B	11.33	abcdefghijk		ART248-1-97-1-B-B	25.1517	abcdefgh		SA28-SARI	89.3333	abcdefghi		SR35266-2-18-2-1	125.333	abcdefg		ART152-3-1-1-B-B	77.5533	abcdef		ART67-17-1-1-B-B	2.6
SR35266-2-11-4-1	30.3	abcdefghij		WAB 2099-WAC1.FKR3-1-TGR1-2	3.3	bcdefghi		SR35285-2-8-4-1	2.03	abc		SR34590-HB3433-2-1-1	6.67219	abcdefgh		644 Gold	2.58133	abcdefghij		ART100-57-1-2-B-B	2.6	abcd		SR34042F3-22-1-1-1-3	11.78	cdef		ART387-9-1-1-1-B	11.33	abcdefghijk		ART216-187-B-1-B-B	25.1293	abcdefgh		ART387-2-1-1-1-0	89.3333	abcdefghi		SA1-SARI	125	abcdefg		SR35266-2-18-1-1	77.4433	abcdef		SR35311-HB3497-4	2.6
WAB 2099-WAC1.FKR3-1-TGR1-2	30.2233	abcdefghij		SR35285-2-8-4-1	3.3	bcdefghi		SR34590-HB3433-2-1-1	2.03	abc		SR34590-HB3433-1-3-1-1	6.67025	abcdefgh		ART79-12-1-1-B-B	2.58	abcdefghij		SR35250-2-4-2-3	2.6	abcd		SR35311-HB3497-88	11.78	cdef		WAB 2099-WAC1.FKR3-1-TGR1-2	11.33	abcdefghijk		KBR 12	25.0864	abcdefgh		UPL 44	89	abcdefghi		Jasmine 85-SARI	125	abcdefg		HR32069F1-1-18-1	77.4433	abcdef		DigJas-78	2.6
SR35266-3-2-3-1	30.16	abcdefghij		ART75-8-1-2-B-B	3.3	bcdefghi		SA1-SARI	2.03	abc		SR35311-HB3497-88	6.66948	abcdefgh		SR35266-3-2-4-1	2.58	abcdefghij		SAHEL 210	2.6	abcd		SR35278-1-9-3-3	11.78	cdef		AgKE99-32	11.33	abcdefghijk		ART152-3-1-1-B-B	25.0741	abcdefgh		SA1-SARI	89	abcdefghi		SA28-SARI	125	abcdefg		SR35300-1-HV-1-2	77.1667	abcdef		ART64-32-1-1-B-B	2.6
Obolo	30.14	abcdefghij		SR35266-3-2-3-1	3.3	bcdefghi		WAB 2099-WAC1.FKR3-1-TGR1-2	2.03	abc		HR32054F1-1-29-1	6.66426	abcdefgh		SA53-SARI	2.57933	abcdefghij		ART75-8-1-2-B-B	2.6	abcd		HR32068F1-4-11-1	11.7767	cdef		SR35285-2-8-4-1	11.33	abcdefghijk		SA4-SARI	24.9831	abcdefgh		UPL 39	89	abcdefghi		Obolo	124.333	abcdefg		ART248-1-97-1-B-B	77.1133	abcdef		SR34590-HB3433-1-1-1	2.6
SR34042F3-22-1-1-1-3	30.0933	abcdefghij		ART216-133-B-1-B-B	3.28333	bcdefghi		Jasmine 85-SARI	2.02667	abc		SR35266-3-2-4-1	6.66351	abcdefgh		DigJas-78	2.57867	abcdefghij		ART245-1-40-1-B-B	2.6	abcd		HB3519-5	11.7767	cdef		SR34590-HB3433-1-1-1	11.28	abcdefghijkl		SA51-SARI	24.9476	abcdefgh		Obolo	89	abcdefghi		AFRICARICE 4	124.333	abcdefg		SR35266-2-4-4-1	77	abcdef		AGRA-CRI-LOL-1-21	2.59667
SR34590-HB3433-2-1-1	30.0467	abcdefghij		ART387-2-1-1-1-0	3.26667	bcdefghi		SA53-SARI	2.02333	abc		Awarema	6.66273	abcdefgh		SA29-SARI	2.57	abcdefghij		SR35266-3-2-4-1	2.6	abcd		Obolo	11.72	cdef		SR34042F3-22-1-1-1-3	11.2233	abcdefghijkl		SA12-SARI	24.9429	abcdefgh		SR35266-2-20-3-1-1	89	abcdefghi		Japonica 1	124.333	abcdefg		644 Gold	76.89	abcdef		AGRA-CRI-LOL-2-29	2.59667
SA29-SARI	30.02	abcdefghij		SR34042F3-22-1-1-1-3	3.26667	bcdefghi		SR35311-HB3497-88	2.02333	abc		ART71-96-1-1-B-B	6.66207	abcdefgh		HR32068F1-4-11-1	2.566	abcdefghij		SA19-SARI	2.6	abcd		HR32086-HB3569-37	11.72	cdef		SR34590-HB3433-2-1-1	11.2233	abcdefghijkl		ART58-5-1-1-B-B	24.8864	abcdefgh		ART216-133-B-1-B-B	88.6667	abcdefghi		SR35266-2-11-4-1	124	abcdefg		N1	76.8867	abcdef		AGRA-CRI-LOL-2-27	2.59667
SR35266-3-2-4-1	29.9467	abcdefghij		SR34590-HB3433-2-1-1	3.26667	bcdefghi		SR35278-1-9-3-3	2.02333	abc		DigJas-78	6.66189	abcdefgh		HB3519-5	2.56333	abcdefghij		WAB 2099-WAC1.FKR3-1-TGR1-2	2.6	abcd		IDS 85	11.67	cdef		Obolo	11.2233	abcdefghijkl		AGRA-CRI-LOL-1-21	24.8735	abcdefgh		ART75-8-1-2-B-B	88.3333	abcdefghi		SA8-SARI	124	abcdefg		JKE56-30	76.5567	abcdef		UPL 30	2.59667
SR35278-1-9-3-3	29.9333	abcdefghij		SR35266-3-2-4-1	3.26667	bcdefghi		SR35266-2-11-4-1	2.02333	abc		SA12-SARI	6.66179	abcdefgh		SR35266-3-2-3-1	2.56267	abcdefghij		SR34590-HB3433-7-3-1	2.6	abcd		CK3	11.67	cdef		HR32069F1-1-18-1	11.2233	abcdefghijkl		DigJas-78	24.8486	abcdefgh		SR35285-2-8-4-1	88.3333	abcdefghi		SR34590-HB3433-7-3-1	123.667	abcdefg		SA4-SARI	76.3333	abcdef		ART58-5-1-1-B-B	2.59333
SA53-SARI	29.92	abcdefghij		SR35278-1-9-3-3	3.26667	bcdefghi		SR35266-3-2-4-1	2.02333	abc		HR32066F1-4-19-1	6.66134	abcdefgh		SR35250-2-4-2-3	2.56	abcdefghij		KAF143	2.6	abcd		SA29-SARI	11.67	cdef		ART73-69-1-2-B-B	11.22	abcdefghijkl		ART64-32-1-1-B-B	24.8486	abcdefgh		HR32086-HB3569-37	88.3333	abcdefghi		ART79-12-1-1-B-B	123.667	abcdefg		ART216-187-B-1-B-B	76.33	abcdef		ARICA 2	2.59
SR35250-2-4-2-3	29.85	abcdefghij		SR35311-HB3497-88	3.26667	bcdefghi		SA29-SARI	2.02333	abc		SR34053(#5-52)-1-4-2-10-1-2	6.65759	abcdefgh		HR32086-HB3569-37	2.554	abcdefghij		SR35300-1-HV-1-2	2.6	abcd		ART79-12-1-1-B-B	11.67	cdef		SR35266-2-11-4-1	11.22	abcdefghijkl		HR32054F1-1-29-1	24.8254	abcdefgh		WAB 2099-WAC1.FKR3-1-TGR1-2	88.3333	abcdefghi		HR32086-HB3569-37	123.667	abcdefg		HR32069F1-1-13-1	76	abcdef		NERICA-L 41	2.59
Japonica 1	29.82	abcdefghij		SA1-SARI	3.26667	bcdefghi		ART67-21-1-2-B-B	2.02333	abc		SA2-SARI	6.65641	abcdefgh		Obolo	2.54667	abcdefghij		UPL 44	2.6	abcd		ART67-21-1-2-B-B	11.67	cdef		SR35266-3-3-5-1	11.22	abcdefghijkl		JKE56-30	24.813	abcdefgh		KAF143	88.3333	abcdefghi		ART387-2-1-1-1-0	123.667	abcdefg		ART64-32-1-1-B-B	76	abcdef		Ex-Baike (Asutware)	2.59
ART67-21-1-2-B-B	29.8	abcdefghij		ART79-12-1-1-B-B	3.26667	bcdefghi		Japonica 1	2.02333	abc		SR34042F3-22-1-1-1-3	6.65476	abcdefgh		ART67-21-1-2-B-B	2.546	abcdefghij		HR32067F1-3-5-1	2.6	abcd		SA53-SARI	11.67	cdef		UPL 44	11.22	abcdefghijkl		BETIA	24.8054	abcdefgh		HB3519-5	88.3333	abcdefghi		644 Gold	123.333	abcdefg		ART67-17-1-1-B-B	75.9433	abcdef		Togo Marshall	2.59
SR35311-HB3497-88	29.78	abcdefghij		UPL 44	3.26667	bcdefghi		ART387-9-1-1-1-B	2.02	abc		HR32067F1-3-5-1	6.65368	abcdefgh		SR35266-2-11-1-1-1	2.54333	abcdefghij		BETIA	2.6	abcd		ART350:2-4-3-B	11.67	cdef		IDS 85	11.17	abcdefghijkl		UPL 30	24.7959	abcdefgh		ART98-4-1-1-B-B	88.3333	abcdefghi		SR34590-HB3433-3-1-1	123.333	abcdefg		SR34053(#5-52)-1-4-2-10-3-1	75.89	abcdef		SA12-SARI	2.59
AgKE99-32	29.7767	abcdefghij		SA53-SARI	3.25	bcdefghi		ART1005-21-1-1-1-B	2.02	abc		SR35266-2-18-3-1	6.65337	abcdefgh		AgKE99-32	2.53333	abcdefghij		ART387-2-1-1-1-0	2.59954	abcd		ART1005-21-1-1-1-B	11.67	cdef		SR35266-3-2-3-1	11.1133	abcdefghijkl		SA29-SARI	24.7954	abcdefgh		ART397-12-1-1-1-B	88.3333	abcdefghi		ART216-133-B-1-B-B	123.333	abcdefg		DigJas-78	75.8867	abcdef		ART152-3-1-1-B-B	2.59
ART1005-21-1-1-1-B	29.73	abcdefghij		SA29-SARI	3.25	bcdefghi		AgKE99-32	2.02	abc		UPL 44	6.64164	abcdefgh		SR34590-HB3433-8-2-1	2.53067	abcdefghij		ART350:2-4-3-B	2.59953	abcd		ART387-9-1-1-1-B	11.67	cdef		ART132-35-1-1-B-B	11.1133	abcdefghijkl		SR34053(#5-52)-1-4-2-10-3-1	24.7934	abcdefgh		SA8-SARI	88.3333	abcdefghi		HR32068F1-4-11-1	123.333	abcdefg		ORYLUX 6	75.7767	abcdef		SR34042F3-22-1-1-1-3	2.59
UPL 44	29.72	abcdefghij		SR35250-2-4-2-3	3.25	bcdefghi		CK3	2.02	abc		SA51-SARI	6.63752	abcdefgh		CK3	2.53	abcdefghij		ART387-9-1-1-1-B	2.59838	abcd		DigJas-78	11.67	cdef		KAF53	11.11	abcdefghijkl		Togo Marshall	24.7766	abcdefgh		HR32068F1-4-11-1	88.3333	abcdefghi		SR35266-3-2-3-1	123	abcdefg		BETIA	75.67	abcdef		BETIA	2.59
AFRICARICE 4	29.6467	abcdefghij		DigJas-78	3.25	bcdefghi		ART350:2-4-3-B	2.02	abc		SR35285-2-8-4-1	6.63688	abcdefgh		ART387-9-1-1-1-B	2.53	abcdefghij		ART58-5-1-1-B-B	2.59784	abcd		AgKE99-32	11.67	cdef		Awarema	11.11	abcdefghijkl		SA53-SARI	24.7707	abcdefgh		ART216-149-B-1-B-B	88	abcdefghi		HB3519-5	123	abcdefg		ART85-48-1-1-B-B	75.6667	abcdef		SA61-SARI	2.58667
ART350:2-4-3-B	29.6467	abcdefghij		SR35266-2-20-3-1-1	3.23333	bcdefghi		Khao Hlanon(AfricaRice)	2.02	abc		ART73-69-1-2-B-B	6.63602	abcdefgh		ART1005-21-1-1-1-B	2.53	abcdefghij		ART71-96-1-1-B-B	2.59778	abcd		SR35250-2-4-2-3	11.6667	cdef		SR35250-2-4-2-3	11.11	abcdefghijkl		SR34590-HB3433-2-1-1	24.7482	abcdefgh		644 Gold	88	abcdefghi		Gigante	123	abcdefg		Jasmine 85-SARI	75.6633	abcdef		HR32054F1-1-29-1	2.58667
Jasmine 85-SARI	29.6333	abcdefghij		SR34590-HB3433-8-2-1	3.23333	bcdefghi		SR34590-HB3433-8-2-1	2.02	abc		WAB 2099-WAC1.FKR3-1-TGR1-2	6.63335	abcdefgh		ART350:2-4-3-B	2.52333	abcdefghij		ART79-12-1-1-B-B	2.59751	abcd		SR34590-HB3433-8-2-1	11.6667	cdef		ART101-99-1-2-B-B	11.11	abcdefghijkl		ARICA 2	24.7307	abcdefgh		Gigante	88	abcdefghi		ART58-5-1-1-B-B	123	abcdefg		SR34590-HB3433-2-1-1	75.5533	abcdef		SR34590-HB3433-2-1-1	2.58667
ART387-9-1-1-1-B	29.62	abcdefghij		Khao Hlanon(AfricaRice)	3.21667	bcdefghi		SR35266-3-2-3-1	2.02	abc		SR34590-HB3433-1-1-1	6.63257	abcdefgh		KAF53	2.52067	abcdefghij		Awarema	2.59723	abcd		SR35266-3-2-3-1	11.6633	cdef		SR35266-3-2-4-1	11.11	abcdefghijkl		Ex-Baike (Asutware)	24.7211	abcdefgh		ART58-5-1-1-B-B	88	abcdefghi		KAF143	123	abcdefg		SR34042F3-22-1-1-1-3	75.5533	abcdef		SA53-SARI	2.58667
Khao Hlanon(AfricaRice)	29.49	abcdefghij		ART67-21-1-2-B-B	3.21667	bcdefghi		SR35250-2-4-2-3	2.02	abc		SR35278-1-9-3-3	6.63178	abcdefgh		IDS 85	2.52	abcdefghij		DigJas-78	2.59686	abcd		KAF53	11.61	cdef		Jasmine 85-SARI	11.11	abcdefghijkl		NERICA-L 41	24.7187	abcdefgh		SR35266-2-11-1-1-1	88	abcdefghi		SR35266-3-3-5-1	122.667	abcdefg		Ex-Baike (Asutware)	75.5	abcdef		ART350:10-2-1-B	2.58667
HR32069F1-1-18-1	29.4533	abcdefghij		IDS 85	3.2	bcdefghi		AFRICARICE 4	2.02	abc		AgKE99-32	6.63152	abcdefgh		SR35266-2-20-3-1-1	2.518	abcdefghij		ART67-21-1-2-B-B	2.59685	abcd		ART73-69-1-2-B-B	11.5567	cdef		SR35311-HB3497-88	11.11	abcdefghijkl		SR35250-2-4-2-3	24.7122	abcdefgh		HR32069F1-1-3-1	88	abcdefghi		SA11-SARI	122.667	abcdefg		ART58-5-1-1-B-B	75.4433	abcdef		SA29-SARI	2.58667
SA28-SARI	29.38	abcdefghij		CK3	3.2	bcdefghi		UPL 44	2.02	abc		UPL 30	6.62873	abcdefgh		Khao Hlanon(AfricaRice)	2.51467	abcdefghij		HR32069F1-1-18-1	2.59539	abcd		Jasmine 85-SARI	11.5567	cdef		SR35278-1-9-3-3	11.11	abcdefghijkl		ART101-99-1-2-B-B	24.6468	abcdefgh		SR35266-3-2-3-1	87.6667	abcdefghi		SR35266-2-11-1-1-1	122.667	abcdefg		SA29-SARI	75.3333	abcdef		ART101-99-1-2-B-B	2.58667
SR34590-HB3433-8-2-1	29.3133	abcdefghij		KAF53	3.2	bcdefghi		SA28-SARI	2.01667	abc		SR23364-133-17-1-HV-1-2	6.62706	abcdefgh		UPL 39	2.514	abcdefghij		ART73-69-1-2-B-B	2.59528	abcd		Oreire	11.5567	cdef		UPL 39	11.11	abcdefghijkl		ORYLUX 6	24.644	abcdefgh		SR34590-HB3433-3-1-1	87.6667	abcdefghi		SR35230-2-9-2-2	122.667	abcdefg		HR32066F1-4-19-1	75.33	abcdef		SR23364-133-17-1-HV-1-2	2.58667
CK3	29.2567	abcdefghij		AFRICARICE 4	3.2	bcdefghi		HR32069F1-1-18-1	2.01667	abc		SA61-SARI	6.6233	abcdefgh		SR35266-2-18-2-1	2.51233	abcdefghij		SA12-SARI	2.59513	abcd		SR35300-1-HV-1-2	11.5567	cdef		ART71-96-1-1-B-B	11.11	abcdefghijkl		ART75-56-1-2-B-B	24.6373	abcdefgh		SR35266-2-11-4-1	87.6667	abcdefghi		HR32069F1-1-3-1	122.667	abcdefg		SA53-SARI	75.2233	abcdef		SR35250-2-4-2-3	2.58667
SR35266-2-18-2-1	29.2317	abcdefghij		AgKE99-32	3.2	bcdefghi		SR35266-2-20-3-1-1	2.01333	abc		ART101-99-1-2-B-B	6.61948	abcdefgh		HR32069F1-1-18-1	2.51133	abcdefghij		SA17-SARI	2.59471	abcd		HR32069F1-1-18-1	11.5567	cdef		AFRICARICE 4	11.0533	abcdefghijkl		ART350:10-2-1-B	24.6213	abcdefgh		ART216-173-B-1-B-B	87.6667	abcdefghi		ART98-4-1-1-B-B	122.333	abcdefg		HR32067F1-3-5-1	75.22	abcdef		ART75-56-1-2-B-B	2.58333
KAF53	29.1267	abcdefghij		ART387-9-1-1-1-B	3.2	bcdefghi		ART73-69-1-2-B-B	2.01333	abc		ART350:10-2-1-B	6.61937	abcdefghi		SR34590-HB3433-6-2-1	2.50867	abcdefghij		HR32054F1-1-29-1	2.59329	abcd		SAHEL 210	11.5567	cdef		SR34590-HB3433-8-2-1	11.0533	abcdefghijkl		SR23364-133-17-1-HV-1-2	24.5925	abcdefgh		ART98-147-1-1-B-B	87.6667	abcdefghi		SR35250-1-15-1-1	122.333	abcdefg		SA10-SARI	75.11	abcdef		HR32066F1-4-19-1	2.58
UPL 39	28.9333	abcdefghij		ART1005-21-1-1-1-B	3.2	bcdefghi		SR35266-2-18-2-1	2.01333	abc		NERICA-L 41	6.61493	abcdefghi		Jasmine 85-SARI	2.50667	abcdefghij		HR32067F1-2-14-1	2.59292	abcd		SR35266-2-11-1-1-1	11.5533	cdef		SA39-SARI	11.0033	abcdefghijkl		ART90-12-1-1-B-B	24.5921	abcdefgh		SR35266-3-3-5-1	87.3333	abcdefghi		ORYLUX 6	122.333	abcdefg		SR34034F3-71-2-1-1-3	75.11	abcdef		Awarema	2.58
IDS 85	28.92	abcdefghij		HR32069F1-1-18-1	3.2	bcdefghi		KAF53	2.01333	abc		ART1005-21-1-1-1-B	6.61441	abcdefghi		SR35300-1-HV-1-2	2.502	abcdefghij		HR32068F1-3-10-1	2.59209	abcd		SR35266-2-20-3-1-1	11.5533	cdef		Japonica 1	11	abcdefghijkl		HR32066F1-4-19-1	24.5879	abcdefgh		ART100-56-1-1-B-B	87.3333	abcdefghi		ART90-46-1-1-B-B	122	abcdefg		HR32054F1-1-29-1	75.11	abcdef		SR35266-2-4-4-1	2.58
SR33705F2-60-1-2-HV-1-2	28.92	abcdefghij		ART350:2-4-3-B	3.2	bcdefghi		SR35266-2-11-1-1-1	2.01333	abc		ART75-56-1-2-B-B	6.61125	abcdefghi		SAHEL 210	2.50133	abcdefghij		CK3	2.59115	abcd		SR35266-2-18-2-1	11.5	def		SAHEL 177	11	abcdefghijkl		SR34042F3-22-1-1-1-3	24.587	abcdefgh		SA3-SARI	87.3333	abcdefghi		ART75-8-1-2-B-B	122	abcdefg		SR35266-3-2-4-1	75.0033	abcdef		ART248-1-97-1-B-B	2.58
SR35266-2-20-3-1-1	28.8533	abcdefghij		SAHEL 210	3.18333	bcdefghi		IDS 85	2.01	abc		ART350:2-4-3-B	6.60971	abcdefghi		SA28-SARI	2.50067	abcdefghij		SR23364-128-1835-1-HV-1-1	2.59069	abcd		SR34590-HB3433-6-2-1	11.5	def		SR35266-2-20-3-1-1	11	abcdefghijkl		SR34034F3-71-2-1-1-3	24.5816	abcdefgh		SA11-SARI	87.3333	abcdefghi		SR34590-HB3433-1-1-1	122	abcdefg		SR35278-1-9-3-3	75.0033	abcdef		HR32067F1-3-5-1	2.58
ART73-69-1-2-B-B	28.8067	abcdefghij		SR35300-1-HV-1-2	3.18333	bcdefghi		ART132-35-1-1-B-B	2.01	abc		ART67-21-1-2-B-B	6.60581	abcdefghi		Japonica 1	2.498	abcdefghij		SA24-SARI	2.58688	abcd		UPL 32	11.4467	def		SR35300-1-HV-1-2	11	abcdefghijkl		AGRA-CRI-LOL-2-29	24.5807	abcdefgh		KE40	87.3333	abcdefghi		ART397-12-1-1-1-B	122	abcdefg		SR35250-2-4-2-3	75	abcdef		CRI-AMANKWATIA	2.57667
ART132-35-1-1-B-B	28.8067	abcdefghij		SR35266-2-16-2-1	3.16667	bcdefghi		Awarema	2.01	abc		ART90-12-1-1-B-B	6.60182	abcdefghi		ART73-69-1-2-B-B	2.49333	abcdefghij		HR32069F1-2-4-1	2.58618	abcd		Khao Hlanon(AfricaRice)	11.4467	def		SR35276-2-4-3-2	11	abcdefghijkl		644 Gold	24.5744	abcdefgh		ART430-16-1-1-1-5	87.3333	abcdefghi		ART71-2-1-1-B-B	122	abcdefg		Awarema	74.8333	abcdef		ART90-12-1-1-B-B	2.57667
SAHEL 210	28.7467	abcdefghij		ART73-69-1-2-B-B	3.16667	bcdefghi		ART71-96-1-1-B-B	2.00667	abc		ART387-9-1-1-1-B	6.60175	abcdefghi		Awarema	2.48867	abcdefghij		IDS 85	2.58618	abcd		Awarema	11.4433	def		Oreire	11	abcdefghijkl		HR32067F1-3-5-1	24.5587	abcdefgh		BOUKE 189	87.3333	abcdefghi		SR34053(#5-52)-1-4-2-10-3-3	121.667	abcdefg		SR35266-2-11-4-1-1	74.78	abcdef		JKE56-30	2.57667
SR33705F2-67-1-1-HV-1-1	28.5733	abcdefghij		UPL 32	3.16667	bcdefghi		SR35300-1-HV-1-2	2.00667	abc		ORYLUX 6	6.60144	abcdefghi		Oreire	2.48667	abcdefghij		SA33-SARI	2.58605	abcd		SR35276-2-4-3-2	11.4433	def		SA29-SARI	11	abcdefghijkl		AGRA-CRI-LOL-2-27	24.5557	abcdefgh		SR35250-1-15-1-1	87.3333	abcdefghi		BOUKE 189	121.667	abcdefg		SR35311-HB3497-88	74.6633	abcdef		SR35266-3-2-4-1	2.57667
ART101-99-1-2-B-B	28.5533	abcdefghij		SA33-SARI	3.16667	bcdefghi		SAHEL 210	2.00667	abc		CRI-1-11-19-12	6.60005	abcdefghi		Jasmine 85-CRI	2.47467	abcdefghij		SA7-SARI	2.58333	abcd		Jasmine 85-CRI	11.4433	def		SAHEL 210	11	abcdefghijkl		CRI-1-11-19-12	24.5528	abcdefgh		ORYLUX 6	87.3333	abcdefghi		ART98-147-1-1-B-B	121.667	abcdefg		ART71-96-1-1-B-B	74.5	abcdef		SR35278-1-9-3-3	2.575
Awarema	28.5067	abcdefghij		Oreire	3.16667	bcdefghi		SA39-SARI	2.00667	abc		HR32067F1-2-14-1	6.595	abcdefghi		ART71-96-1-1-B-B	2.474	abcdefghij		SR35266-2-12-2-1	2.5769	abcd		ART71-96-1-1-B-B	11.4433	def		SA53-SARI	11	abcdefghijkl		ART71-96-1-1-B-B	24.5341	abcdefgh		SR35266-3-1-5-1	87.3333	abcdefghi		HR32069F1-1-13-1	121.667	abcdefg		SA37-SARI	74.4433	abcdef		ART71-96-1-1-B-B	2.57333
SR35300-1-HV-1-2	28.5067	abcdefghij		SR33705F2-67-1-1-HV-1-1	3.16667	bcdefghi		ART143-150-B-1-B-B	2.00333	abc		AGRA-CRI-LOL-1-21	6.59401	abcdefghi		AFRICARICE 4	2.47	abcdefghij		HR32068F1-4-11-1	2.56667	abcd		Japonica 1	11.39	def		SR34590-HB3433-6-2-1	11	abcdefghijkl		HR32069F1-1-13-1	24.5301	abcdefgh		SR34053(#5-52)-1-4-2-10-3-3	87	abcdefghi		SA18-SARI	121.667	abcdefg		UPL 44	74.4433	abcdef		SR34034F3-71-2-1-1-3	2.57
ART143-150-B-1-B-B	28.3733	abcdefghij		SA7-SARI	3.16667	bcdefghi		ART101-99-1-2-B-B	2.00333	abc		IDS 85	6.59292	abcdefghi		UPL 32	2.468	abcdefghij		SA61-SARI	2.56667	abcd		SA28-SARI	11.39	def		Jasmine 85-CRI	11	abcdefghijkl		SR35266-3-2-4-1	24.5206	abcdefgh		SR34590-HB3433-1-1-1	87	abcdefghi		SR35266-3-1-5-1	121.667	abcdefg		SR34590-HB3433-1-1-1	74.2233	abcdef		CRI-1-11-19-12	2.57
Oreire	28.3333	abcdefghij		SR35266-2-11-1-1	3.16667	bcdefghi		Oreire	2.00333	abc		HR32068F1-3-10-1	6.59199	abcdefghi		SA12-SARI	2.466	abcdefghij		NERICA-L 41	2.56667	abcd		AFRICARICE 4	11.3867	def		ART143-150-B-1-B-B	10.9967	abcdefghijkl		Awarema	24.5182	abcdefgh		SR34590-HB3433-7-3-1	87	abcdefghi		SR35266-2-12-4-1	121.5	bcdefg		SA56-SARI	74	abcdef		SR35311-HB3497-88	2.57
ART71-96-1-1-B-B	28.3	abcdefghij		SA39-SARI	3.16667	bcdefghi		ART67-17-1-1-B-B	2	abc		SA24-SARI	6.59063	abcdefghi		SR35276-2-4-3-2	2.46	abcdefghij		SA66-SARI	2.56667	abcd		ART143-150-B-1-B-B	11.3367	def		SA28-SARI	10.9967	abcdefghijkl		SR35311-HB3497-88	24.4946	abcdefgh		HR32069F1-1-13-1	87	abcdefghi		SR35278-1-7-3-2	121.333	bcdefg		SA17-SARI	73.8867	abcdef		UPL 44	2.57
Jasmine 85-CRI	28.24	abcdefghij		Awarema	3.15	bcdefghi		Jasmine 85-CRI	2	abc		ARICA 2	6.58475	abcdefghi		SR35266-2-11-1-1	2.456	abcdefghij		HB3519-5	2.56667	abcd		SA12-SARI	11.3367	def		SR35266-2-18-2-1	10.9433	abcdefghijkl		SR35266-3-1-3-1	24.4878	abcdefgh		ART90-46-1-1-B-B	86.6667	abcdefghi		SA3-SARI	121.333	bcdefg		SA12-SARI	73.8867	abcdef		SA4-SARI	2.56667
SA7-SARI	28.2117	abcdefghij		SR34590-HB3433-6-2-1	3.15	bcdefghi		ART216-187-B-1-B-B	2	abc		HR32069F1-2-4-1	6.58152	abcdefghi		ART143-150-B-1-B-B	2.45333	abcdefghij		ART75-56-1-2-B-B	2.56667	abcd		ART101-99-1-2-B-B	11.3333	def		BETIA	10.89	abcdefghijkl		CRI-AMANKWATIA	24.4657	abcdefgh		ART71-2-1-1-B-B	86.6667	abcdefghi		KE40	121.333	bcdefg		SR34590-HB3433-7-2-1	73.78	abcdef		SR35266-3-1-3-1	2.56667
SA39-SARI	28.18	abcdefghij		Jasmine 85-CRI	3.15	bcdefghi		ART64-32-1-1-B-B	2	abc		CK3	6.57958	abcdefghi		SA39-SARI	2.44867	abcdefghij		HR32069F1-1-13-1	2.56667	abcd		ART132-35-1-1-B-B	11.3333	def		Khao Hlanon(AfricaRice)	10.89	abcdefghijkl		SR35266-2-4-4-1	24.4164	abcdefgh		SA18-SARI	86.6667	abcdefghi		ART216-149-B-1-B-B	121	bcdefg		SA54-SARI	73.7767	abcdef		HR32069F1-1-13-1	2.56333
ART216-187-B-1-B-B	28.1533	abcdefghij		SR35266-3-1-3-1	3.13333	bcdefghi		BETIA	2	abc		ART152-3-1-1-B-B	6.57894	abcdefghi		SAHEL 177	2.44333	abcdefghij		ART350:10-2-1-B	2.56667	abcd		SA39-SARI	11.3333	def		ART67-17-1-1-B-B	10.89	abcdefghijkl		UPL 44	24.3416	abcdefgh		SA36-SARI	86.3333	abcdefghi		SR35278-1-9-2-1	121	bcdefg		SR35285-2-8-4-1	73.3867	abcdef		ORYLUX 6	2.56
SR34590-HB3433-6-2-1	27.8733	abcdefghij		ART143-150-B-1-B-B	3.13333	bcdefghi		SR34590-HB3433-6-2-1	1.99667	abc		SR35266-3-1-3-1	6.57888	abcdefghi		SR35266-2-20-1-1	2.44	abcdefghij		ORYLUX 6	2.56667	abcd		SAHEL 177	11.33	def		HR32067F1-3-5-1	10.89	abcdefghijkl		ART84-35-1-1-B-B	24.3323	abcdefgh		ART314-14-B-1-B-B	86.3333	abcdefghi		ART216-173-B-1-B-B	121	bcdefg		ART101-99-1-2-B-B	73.0533	abcdef		SR34053(#5-52)-1-4-2-10-3-1	2.55667
SR35266-2-11-1-1	27.8533	abcdefghij		SR23364-128-1907-1-HV-1-1	3.13333	bcdefghi		SA7-SARI	1.99667	abc		ART248-1-97-1-B-B	6.5785	abcdefghi		ART101-99-1-2-B-B	2.43867	abcdefghij		ART248-1-97-1-B-B	2.56667	abcd		WAB 2101-WAC4-1-TGR1-WAT3-5-TGR2	11.2767	def		ART64-32-1-1-B-B	10.89	abcdefghijkl		SR35278-1-9-3-3	24.207	abcdefgh		SR35278-1-9-2-1	86.3333	abcdefghi		ART100-56-1-1-B-B	120.667	bcdefg		ART73-69-1-2-B-B	73.0033	abcdef		AgKE99-32	2.55667
UPL 32	27.82	abcdefghij		ART483-10-1-1-1-B	3.13333	bcdefghi		UPL 32	1.99333	abc		KBR 12	6.57461	abcdefghi		SR35266-2-16-2-1	2.438	abcdefghij		GR18-SARI	2.56667	abcd		SR33705F2-67-1-1-HV-1-1	11.2767	def		Ex-Baike (Asutware)	10.89	abcdefghijkl		ART73-69-1-2-B-B	24.0912	abcdefgh		AgKE99-26	86.3333	abcdefghi		SA36-SARI	120.667	bcdefg		ART64-31-1-1-B-B	73.0033	abcdef		ART84-35-1-1-B-B	2.55333
SA12-SARI	27.7867	abcdefghij		SR35276-2-4-3-2	3.13333	bcdefghi		Ex-Baike (Asutware)	1.99333	abc		SR35311-HB3497-4	6.56807	abcdefghi		SA7-SARI	2.435	bcdefghij		ART152-3-1-1-B-B	2.56667	abcd		HR32046F1-2-261	11.2233	def		SA34-SARI	10.89	abcdefghijkl		WAB 2099-WAC1.FKR3-1-TGR1-2	24.0428	abcdefgh		SR23364-133-171-1-HV-1-1	86	abcdefghi		SR23364-133-171-1-HV-1-1	120.333	bcdefg		WAB 2099-WAC1.FKR3-1-TGR1-2	73	abcdef		SR35285-2-8-4-1	2.55
ART64-32-1-1-B-B	27.7733	abcdefghij		ART71-96-1-1-B-B	3.13333	bcdefghi		SA12-SARI	1.99333	abc		HR32069F1-1-13-1	6.56512	abcdefghi		HR32046F1-2-261	2.43267	bcdefghij		ART101-99-1-2-B-B	2.56667	abcd		SR35266-2-16-2-1	11.2233	def		HR32066F1-4-19-1	10.89	abcdefghijkl		SR35285-2-8-4-1	24.0042	abcdefgh		ART263-11-B-1-B-B	85.6667	abcdefghi		SA21-SARI	120.333	bcdefg		HB3519-5	72.9967	abcdef		ART73-69-1-2-B-B	2.55
ART67-17-1-1-B-B	27.72	abcdefghij		ART484-19-1-1-1-B	3.13333	bcdefghi		SR35266-2-11-1-1	1.99333	abc		Togo Marshall	6.56496	abcdefghi		WAB 2101-WAC4-1-TGR1-WAT3-5-TGR2	2.43133	bcdefghij		SR34590-HB3433-1-1-1	2.56667	abcd		SR35266-2-11-1-1	11.2233	def		SA63-SARI	10.89	abcdefghijkl		SA24-SARI	23.9589	abcdefgh		SA15-SARI	85.6667	abcdefghi		TV2	120	bcdefg		CRI-1-11-15-5	72.9433	abcdef		ART1005-21-1-1-1-B	2.55
ART85-48-1-1-B-B	27.6933	abcdefghij		SA12-SARI	3.13333	bcdefghi		SR33705F2-67-1-1-HV-1-1	1.99	abc		644 Gold	6.56133	abcdefghi		ART85-48-1-1-B-B	2.426	bcdefghij		HR32046F1-2-261	2.56345	abcd		ART67-17-1-1-B-B	11.22	def		HR32046F1-2-261	10.8867	abcdefghijkl		AgKE99-32	23.8876	abcdefgh		ART64-55-1-1-B-B	85.6667	abcdefghi		ART430-16-1-1-1-5	120	bcdefg		DigJas-61	72.8867	abcdef		WAB 2099-WAC1.FKR3-1-TGR1-2	2.55
HR32046F1-2-261	27.68	abcdefghij		ART101-99-1-2-B-B	3.13333	bcdefghi		HR32054F1-1-29-1	1.99	abc		SR34034F3-71-2-1-1-3	6.56069	abcdefghi		ART132-35-1-1-B-B	2.41933	bcdefghij		HR32066F1-4-16-1	2.56318	abcd		BETIA	11.22	def		SR35266-2-11-1-1-1	10.8367	abcdefghijkl		Khao Hlanon(AfricaRice)	23.8697	abcdefgh		80 DAYS-SARI	85.6667	abcdefghi		ART314-14-B-1-B-B	120	bcdefg		HR32068F1-4-11-1	72.7767	abcdef		SA24-SARI	2.54333
SR35266-2-16-2-1	27.6767	abcdefghij		ART132-35-1-1-B-B	3.13333	bcdefghi		ART105-3-1-2-B-B	1.99	abc		AGRA-CRI-LOL-2-29	6.55941	abcdefghi		HR32066F1-4-19-1	2.41667	bcdefghij		HR32069F1-1-3-1	2.56227	abcd		SR35266-2-20-1-1	11.22	def		SA7-SARI	10.835	abcdefghijkl		Oreire	23.854	abcdefgh		TV2	85.6667	abcdefghi		SR35276-2-4-3-3	120	bcdefg		AgKE99-32	72.67	abcdef		N1	2.54333
BETIA	27.6433	abcdefghij		HR32046F1-2-261	3.11667	bcdefghi		ART397-3-2-1-1-B	1.99	abc		HR32069F1-3-5-1	6.55531	abcdefghi		HR32067F1-3-5-1	2.41667	bcdefghij		HR32069F1-3-5-1	2.56206	abcd		SR34598-HB-16-HV-1-1	11.22	def		SR34598-HB-16-HV-1-1	10.8333	abcdefghijkl		SR35266-2-16-2-1	23.8263	abcdefgh		SA21-SARI	85.6667	abcdefghi		CRI-Dartey	119.667	bcdefg		ART1005-21-1-1-1-B	72.6133	abcdef		ART67-21-1-2-B-B	2.54333
Ex-Baike (Asutware)	27.62	abcdefghij		UPL 6	3.11667	bcdefghi		HR32066F1-4-19-1	1.99	abc		CRI-AMANKWATIA	6.54986	abcdefghi		UPL 6	2.41667	bcdefghij		CRI-1-11-19-12	2.5605	abcd		Ex-Baike (Asutware)	11.22	def		WAB 2101-WAC4-1-TGR1-WAT3-5-TGR2	10.83	abcdefghijkl		ART67-21-1-2-B-B	23.7446	abcdefgh		CRI-Dartey	85.6667	abcdefghi		SA31-SARI	119.667	bcdefg		ART67-21-1-2-B-B	72.3333	abcdef		ART387-9-1-1-1-B	2.54
HR32054F1-1-29-1	27.5767	abcdefghij		SR35266-2-20-1-1	3.11667	bcdefghi		ART85-48-1-1-B-B	1.99	abc		AGRA-CRI-LOL-2-27	6.5486	abcdefghi		SA34-SARI	2.41533	bcdefghij		ART90-12-1-1-B-B	2.5605	abcd		HR32066F1-4-19-1	11.22	def		ART216-187-B-1-B-B	10.78	abcdefghijklm		HR32069F1-3-5-1	23.7411	abcdefgh		SR35278-1-7-3-2	85.3333	abcdefghi		AgKE99-26	119.667	bcdefg		ART350:2-4-3-B	72.33	abcdef		HR32067F1-2-14-1	2.54
HR32066F1-4-19-1	27.5733	abcdefghij		ART216-187-B-1-B-B	3.1	bcdefghi		SA34-SARI	1.99	abc		SA4-SARI	6.54597	abcdefghi		BETIA	2.41467	bcdefghij		UPL 30	2.5605	abcd		HR32067F1-3-5-1	11.22	def		HR32069F1-3-5-1	10.7767	abcdefghijklm		HR32067F1-2-14-1	23.702	abcdefgh		SA19-SARI	85.3333	abcdefghi		JKE56-3	119.333	bcdefg		UPL 30	72.2233	abcdef		ART350:2-4-3-B	2.54
ART483-10-1-1-1-B	27.5333	abcdefghij		SAHEL 177	3.1	bcdefghi		HR32046F1-2-261	1.99	abc		GR18-SARI	6.53543	abcdefghi		ART64-32-1-1-B-B	2.41467	bcdefghij		SA28-SARI	2.54565	abcd		UPL 87	11.22	def		SR35266-2-16-2-1	10.7767	abcdefghijklm		HR32068F1-3-10-1	23.6901	abcdefgh		ART493-16-1-1-1-B	85.3333	abcdefghi		KE53	119.333	bcdefg		HR32069F1-1-3-1	72.11	abcdef		HR32068F1-3-10-1	2.54
SA33-SARI	27.46	abcdefghij		SR34590-HB3433-1-3-1-1	3.1	bcdefghi		HR32067F1-3-5-1	1.99	abc		SR34053(#5-52)-1-4-2-10-3-1	6.5339	abcdefghi		HR32054F1-1-29-1	2.41	bcdefghij		SR34034F3-71-2-1-1-3	2.54142	abcd		ART64-32-1-1-B-B	11.22	def		SA12-SARI	10.7767	abcdefghijklm		N1	23.6258	abcdefgh		SR34590-HB 3433-8-3-1	85.3333	abcdefghi		SR34590-HB 3433-8-3-1	119.333	bcdefg		Oreire	72.11	abcdef		SR35266-2-16-2-1	2.53667
ART105-3-1-2-B-B	27.4533	abcdefghij		WAB 2101-WAC4-1-TGR1-WAT3-5-TGR2	3.1	bcdefghi		SR35266-2-16-2-1	1.98667	abc		JKE56-30	6.53203	abcdefghi		SR34598-HB-16-HV-1-1	2.408	bcdefghij		SR34590-HB3433-1-3-1-1	2.54075	abcd		SA34-SARI	11.22	def		UPL 32	10.7767	abcdefghijklm		SR34590-HB3433-7-2-1	23.6192	abcdefgh		228	85	abcdefghi		SR33705F2-60-1-1HV-1-1	119	bcdefg		ART387-9-1-1-1-B	72	abcdef		GR18-SARI	2.53667
ART484-19-1-1-1-B	27.44	abcdefghij		HR32069F1-3-5-1	3.1	bcdefghi		SR35266-2-20-1-1	1.98667	abc		SR35266-2-16-2-1	6.53147	abcdefghi		SA63-SARI	2.408	bcdefghij		SR35266-2-18-3-1	2.53833	abcd		SA63-SARI	11.22	def		HR32054F1-1-29-1	10.7767	abcdefghijklm		ART350:2-4-3-B	23.6172	abcdefgh		KE53	85	abcdefghi		SA19-SARI	119	bcdefg		AFRICARICE 6	71.89	abcdef		Khao Hlanon(AfricaRice)	2.53
SR23364-128-1907-1-HV-1-1	27.4153	abcdefghij		HR32054F1-1-29-1	3.1	bcdefghi		SR35276-2-4-3-2	1.98333	abc		SA60-SARI	6.52464	abcdefghi		Ex-Baike (Asutware)	2.40467	bcdefghij		CRI-1-11-15-5	2.53333	abcd		SA7-SARI	11.165	def		HR32066F1-4-16-1	10.7767	abcdefghijklm		ART1005-21-1-1-1-B	23.6091	abcdefgh		AFRICARICE 6	85	abcdefghi		ART112-74-1-1-B-B	119	bcdefg		Khao Hlanon(AfricaRice)	71.78	abcdef		Oreire	2.52667
HR32067F1-3-5-1	27.4067	abcdefghij		ART67-17-1-1-B-B	3.1	bcdefghi		HR32069F1-3-5-1	1.98333	abc		HR32068F1-4-11-1	6.52009	abcdefghi		ART67-17-1-1-B-B	2.402	bcdefghij		SR34053(#5-52)-1-4-2-10-3-1	2.53333	abcd		SR34590-HB 3433-5-1-1	11.1133	def		SR35266-2-20-1-1	10.7767	abcdefghijklm		KAF53	23.5795	abcdefgh		JKE56-12	85	abcdefghi		SR34590-HB3433-7-2-1	118.333	bcdefg		ART350:10-2-1-B	71.72	abcdef		HR32069F1-3-5-1	2.52333
HR32069F1-3-5-1	27.3733	abcdefghij		Ex-Baike (Asutware)	3.1	bcdefghi		SR33705F2-60-1-2-HV-1-2	1.98333	abc		HR32046F1-2-261	6.51098	abcdefghi		UPL 87	2.40133	bcdefghij		SR35266-3-1-3-1	2.53333	abcd		HR32054F1-1-29-1	11.1133	def		ART484-19-1-1-1-B	10.7767	abcdefghijklm		HR32068F1-4-11-1	23.5673	abcdefgh		SR35276-2-4-3-3	85	abcdefghi		ART493-16-1-1-1-B	118.333	bcdefg		SR23364-133-17-1-HV-1-2	71.6667	abcdef		SR34590-HB3433-7-2-1	2.52333
ART397-3-2-1-1-B	27.18	abcdefghij		ART64-32-1-1-B-B	3.1	bcdefghi		SA63-SARI	1.98333	abc		HR32066F1-4-16-1	6.50615	abcdefghi		SR23364-128-1907-1-HV-1-1	2.4	bcdefghij		SA4-SARI	2.53333	abcd		UPL 6	11.1133	def		UPL 87	10.72	abcdefghijklm		ART387-9-1-1-1-B	23.5544	abcdefgh		ART216-212-B-1-B-B	85	abcdefghi		SA69-SARI	118.333	bcdefg		ART216-212-B-1-B-B	71.4433	abcdef		CK3	2.52
SR35266-3-1-3-1	27.1633	abcdefghij		SR34598-HB-16-HV-1-1	3.1	bcdefghi		SR35266-3-1-3-1	1.98	abc		SA68-SARI	6.50446	abcdefghi		ART216-187-B-1-B-B	2.39133	bcdefghij		228	2.53333	abcd		ART216-187-B-1-B-B	11.11	def		SR35266-2-11-1-1	10.72	abcdefghijklm		IDS 85	23.5526	abcdefgh		SR33705F2-60-1-1HV-1-1	84.6667	abcdefghi		SA15-SARI	118.333	bcdefg		ART75-56-1-2-B-B	71.3333	abcdef		IDS 85	2.52
SR35266-2-20-1-1	27.1067	abcdefghij		BETIA	3.1	bcdefghi		ART58-46-1-1-B-B	1.98	abc		Khao Hlanon(AfricaRice)	6.49437	abcdefghi		HR32069F1-3-5-1	2.38667	bcdefghij		SR35266-2-16-2-1	2.53333	abcd		HR32066F1-4-16-1	11.11	def		SA55-SARI	10.6667	abcdefghijklm		GR18-SARI	23.5237	abcdefgh		SA69-SARI	84.6667	abcdefghi		SA22-SARI	118.333	bcdefg		CK3	71.33	abcdef		KAF53	2.51667
SR35276-2-4-3-2	27.0767	abcdefghij		SA63-SARI	3.1	bcdefghi		ART483-10-1-1-1-B	1.98	abc		HB3519-5	6.49062	abcdefghi		SR35266-3-1-3-1	2.384	bcdefghij		JKE56-30	2.53333	abcd		HR32069F1-2-4-1	11.0033	def		SA33-SARI	10.6667	abcdefghijklm		SR35278-1-9-2-1	23.4072	abcdefgh		ART100-57-1-2-B-B	84.6667	abcdefghi		SR34590-HB3433-5-1-1	118.333	bcdefg		SA65-SARI	71.33	abcdef		HB3519-5	2.515
UPL 6	26.9267	abcdefghij		SA34-SARI	3.1	bcdefghi		UPL 6	1.98	abc		HR32069F1-1-3-1	6.48966	abcdefghi		SR33705F2-67-1-1-HV-1-1	2.38333	bcdefghij		ART216-212-B-1-B-B	2.53333	abcd		SR35278-1-9-3-1	11	def		SR35266-2-19-1-1	10.6667	abcdefghijklm		HR32069F1-2-4-1	23.3583	abcdefgh		SR34590-HB3433-7-2-1	84.3333	abcdefghi		IDSA85	118.333	bcdefg		ART493-16-1-1-1-B	71.2233	abcdef		HR32069F1-2-4-1	2.51333
HR32066F1-4-16-1	26.8133	abcdefghij		HR32066F1-4-19-1	3.1	bcdefghi		ART484-19-1-1-1-B	1.98	abc		ART84-35-1-1-B-B	6.48367	abcdefghi		HR32066F1-4-16-1	2.382	bcdefghij		SR34590-HB3433-6-2-1	2.53333	abcd		HR32069F1-3-5-1	11	def		SR33705F2-67-1-1-HV-1-1	10.6133	abcdefghijklm		CK3	23.3512	abcdefgh		IDSA85	84.3333	abcdefghi		SR35266-2-4-4-1	118.333	bcdefg		ART90-12-1-1-B-B	71.11	abcdef		HR32066F1-4-16-1	2.51
HR32069F1-2-4-1	26.7733	abcdefghij		SR33705F2-60-1-2-HV-1-2	3.1	bcdefghi		SR34598-HB-16-HV-1-1	1.98	abc		SR35266-2-4-4-1	6.48312	abcdefghi		SR34590-HB 3433-5-1-1	2.38	bcdefghij		SR35278-1-9-2-1	2.53333	abcd		SA55-SARI	11	def		SR23364-128-1907-1-HV-1-1	10.61	abcdefghijklm		HB3519-5	23.2759	abcdefgh		ART112-74-1-1-B-B	84.3333	abcdefghi		CRI-1-21-5-12	118	cdefg		228	70.89	abcdef		SR35278-1-9-2-1	2.50667
SA34-SARI	26.7667	abcdefghij		HR32067F1-3-5-1	3.1	bcdefghi		SAHEL 177	1.98	abc		Oreire	6.47951	abcdefghi		HR32069F1-2-4-1	2.37933	bcdefghij		ART84-35-1-1-B-B	2.53333	abcd		SR35266-3-1-3-1	11	def		HR32069F1-2-4-1	10.61	abcdefghijklm		HR32069F1-1-3-1	23.2482	abcdefgh		ART84-35-1-1-B-B	84	abcdefghi		80 DAYS-SARI	118	cdefg		IDSA85	70.7767	abcdef		HR32068F1-4-11-1	2.50333
SA63-SARI	26.6667	abcdefghij		UPL 87	3.1	bcdefghi		ART125-26-1-1-B-B	1.98	abc		KAF53	6.46005	abcdefghi		SR33705F2-60-1-2-HV-1-2	2.37533	bcdefghij		ART64-31-1-1-B-B	2.53333	abcd		WAB 2138-WAC B-2-TGR2-WAT5-1	11	def		HR32068F1-3-10-1	10.5567	abcdefghijklm		SR34590-HB3433-6-2-1	23.2211	abcdefgh		SR35230-2-9-2-2	84	abcdefghi		AFRICARICE 6	118	cdefg		CRI-1-11-19-12	70.7767	abcdef		HR32046F1-2-261	2.50333
SAHEL 177	26.6433	abcdefghij		SR34590-HB 3433-5-1-1	3.06667	bcdefghi		HR32069F1-2-4-1	1.97667	abc		SR35278-1-9-2-1	6.45802	abcdefghi		SR35266-2-19-1-1	2.36467	bcdefghij		AFRICARICE 6	2.53333	abcd		SR33705F2-60-1-2-HV-1-2	11	def		ART397-3-2-1-1-B	10.5567	abcdefghijklm		SR35266-2-11-4-1-1	23.1777	abcdefgh		ART245-1-16-1-B-B	83.6667	abcdefghi		ART84-35-1-1-B-B	118	cdefg		SR34590-HB3433-6-2-1	70.6667	abcdef		HR32069F1-1-3-1	2.50333
SA20-SARI	26.6	abcdefghij		ART105-3-1-2-B-B	3.06667	bcdefghi		SA30-SARI	1.97667	abc		SR34590-HB3433-7-2-1	6.45429	abcdefghi		WAB 2138-WAC B-2-TGR2-WAT5-1	2.36467	bcdefghij		Khao Hlanon(AfricaRice)	2.53333	abcd		ART483-10-1-1-1-B	11	def		ART105-3-1-2-B-B	10.5567	abcdefghijklm		SA54-SARI	23.142	abcdefgh		ART245-1-40-1-B-B	83.6667	abcdefghi		ART216-212-B-1-B-B	118	cdefg		HR32067F1-2-14-1	70.6667	abcdef		SR34590-HB3433-6-2-1	2.5
SR34598-HB-16-HV-1-1	26.6	abcdefghij		SR35278-1-9-3-1	3.06667	bcdefghi		SA26-SARI	1.97667	abc		SA28-SARI	6.45106	abcdefghi		SR35278-1-9-3-1	2.358	bcdefghij		SR23364-133-17-1-HV-1-2	2.53333	abcd		SR34590-HB3433-6-1-1	11	def		ART350:2-6-1-B	10.5567	abcdefghijklm		SR35266-2-11-1-1	23.1222	abcdefgh		SA9-SARI	83.6667	abcdefghi		SR35276-2-4-3-1-1	118	cdefg		TV1	70.6633	abcdef		SR35266-2-11-1-1	2.49667
ART125-26-1-1-B-B	26.5867	abcdefghij		SR35266-2-17-1-1	3.06667	bcdefghi		SA20-SARI	1.97667	abc		Japonica 1	6.44262	abcdefghi		SA24-SARI	2.35667	bcdefghij		DigJas-61	2.53333	abcd		SR23364-128-1907-1-HV-1-1	10.9967	def		SA26-SARI	10.5567	abcdefghijklm		CRI-1-11-15-5	23.1207	abcdefgh		ART174-2-1-1-B-B	83.6667	abcdefghi		ART90-9-1-1-B-B	118	cdefg		SR35278-1-9-2-1	70.5567	abcdef		AFRICARICE 4	2.49333
SA24-SARI	26.5533	abcdefghij		SA55-SARI	3.06667	bcdefghi		SR23364-128-1907-1-HV-1-1	1.97667	abc		Jasmine 85-CRI	6.43236	abcdefghi		ART397-3-2-1-1-B	2.35467	bcdefghij		SR34590-HB3433-7-2-1	2.53333	abcd		SR35266-2-19-1-1	10.9967	def		SA62-SARI	10.5567	abcdefghijklm		HR32066F1-4-16-1	23.1172	abcdefgh		ART248-1-97-1-B-B	83.6667	abcdefghi		ART263-11-B-1-B-B	117.667	cdefg		SR35266-3-1-3-1	70.33	abcdef		SR35266-2-11-4-1-1	2.49333
SR34590-HB 3433-5-1-1	26.5467	abcdefghij		HR32069F1-2-4-1	3.06667	bcdefghi		SA62-SARI	1.97667	abc		N1	6.41759	abcdefghi		SA62-SARI	2.35333	bcdefghij		TV1	2.53333	abcd		HR32068F1-3-10-1	10.9433	def		SA20-SARI	10.5567	abcdefghijklm		HR32046F1-2-261	23.0418	abcdefgh		SA66-SARI	83.3333	abcdefghi		ART64-55-1-1-B-B	117.667	cdefg		SAHEL 134	70.33	abcdef		SR35266-2-20-3-1	2.49333
SA26-SARI	26.4933	abcdefghij		SA30-SARI	3.06667	bcdefghi		SA55-SARI	1.97667	abc		SR34590-HB3433-6-2-1	6.41733	abcdefghi		SA30-SARI	2.352	bcdefghij		SR34590-HB3433-8-2-1	2.53333	abcd		SA30-SARI	10.9433	def		ART125-26-1-1-B-B	10.5567	abcdefghijklm		SA60-SARI	22.991	abcdefgh		SA54-SARI	83.3333	abcdefghi		SA66-SARI	117.667	cdefg		GR18-SARI	70.22	abcdef		SA60-SARI	2.49
SR34590-HB3433-1-3-1-1	26.4333	abcdefghij		ART397-3-2-1-1-B	3.06667	bcdefghi		HR32066F1-4-16-1	1.97333	abc		CRI-1-11-15-5	6.39209	abcdefghi		ART484-19-1-1-1-B	2.352	bcdefghij		Oreire	2.53333	abcd		SR35311-HB3497-87	10.89	def		SA30-SARI	10.5567	abcdefghijklm		ART64-31-1-1-B-B	22.9821	abcdefgh		ART75-30-1-1-B-B	83	abcdefghi		228	117.667	cdefg		AFRICARICE 4	70.11	abcdef		SA68-SARI	2.49
ART58-46-1-1-B-B	26.3867	abcdefghij		SA26-SARI	3.06667	bcdefghi		SA33-SARI	1.97333	abc		SR35250-1-23-2-1	6.39119	abcdefghi		SR34590-HB3433-6-1-1	2.35067	bcdefghij		KAF53	2.52873	abcd		SA33-SARI	10.89	def		SR35266-3-1-3-1	10.5533	abcdefghijklm		DigJas-61	22.9249	abcdefgh		SR34590-HB3433-5-1-1	83	abcdefghi		JKE56-12	117.667	cdefg		KAF53	69.3867	abcdef		CRI-1-11-15-5	2.48667
SA30-SARI	26.3533	abcdefghij		SR34590-HB3433-6-1-1	3.06667	bcdefghi		ART350:2-6-1-B	1.97	abc		AFRICARICE 6	6.37832	abcdefghi		SA26-SARI	2.34733	bcdefghij		Japonica 1	2.52873	abcd		SR35266-2-17-1-1	10.89	def		UPL 6	10.5533	abcdefghijklm		Jasmine 85-CRI	22.8116	abcdefgh		Toxx3377	83	abcdefghi		SR34042F3-22-1-1-5-3	117.667	cdefg		Japonica 1	69.3333	abcdef		SA54-SARI	2.48667
GR18-SARI	26.29	abcdefghij		HR32066F1-4-16-1	3.06667	bcdefghi		ARICA 3	1.97	abc		228	6.37315	abcdefghi		HR32068F1-3-10-1	2.346	bcdefghij		Jasmine 85-CRI	2.52873	abcd		ART105-3-1-2-B-B	10.89	def		GR18-SARI	10.5033	abcdefghijklm		Japonica 1	22.7755	abcdefgh		CRI-1-21-5-12	82.8333	abcdefghi		AGRA-SARI	117.333	cdefg		SA24-SARI	69.2233	abcdef		Japonica 1	2.48333
HR32067F1-2-14-1	26.26	abcdefghij		SA62-SARI	3.06667	bcdefghi		HR32067F1-2-14-1	1.97	abc		SR35266-2-11-4-1-1	6.36808	abcdefghi		SR35266-2-17-1-1	2.34267	bcdefghij		SA60-SARI	2.51576	abcd		ART350:2-6-1-B	10.89	def		SR34590-HB3433-6-1-1	10.5	abcdefghijklm		AFRICARICE 4	22.6642	abcdefgh		Digang	82.6667	abcdefghi		Enapa	117.333	cdefg		UPL 32	69.22	abcdef		ART64-31-1-1-B-B	2.48333
WAB 2101-WAC4-1-TGR1-WAT3-5-TGR2	26.22	abcdefghij		WAB 2138-WAC B-2-TGR2-WAT5-1	3.06667	bcdefghi		WAB 2101-WAC4-1-TGR1-WAT3-5-TGR2	1.97	abc		WAB 2135-WAC B-2-TGR3-WAT8-3	6.36453	abcdefghi		SA55-SARI	2.34267	bcdefghij		SR35311-HB3497-4	2.5033	abcd		SA24-SARI	10.89	def		ARICA 3	10.4967	abcdefghijklm		SA68-SARI	22.6601	abcdefgh		ART152-3-1-1-B-B	82.6667	abcdefghi		TV1	117.333	cdefg		SR35266-2-20-3-1	69	abcdef		Jasmine 85-CRI	2.48333
SA55-SARI	26.22	abcdefghij		SA20-SARI	3.06667	bcdefghi		SA24-SARI	1.97	abc		DigJas-61	6.36236	abcdefghi		SA33-SARI	2.34067	bcdefghij		UPL 32	2.5	abcd		ART397-3-2-1-1-B	10.89	def		ART478-13-8-1-1-B	10.4467	abcdefghijklm		UPL 32	22.5706	abcdefgh		SR34053(#5-52)-1-4-2-10-3-1	82.6667	abcdefghi		ART75-14-1-2-B-B	117	cdefg		HR32068F1-3-10-1	68.78	abcdef		ART493-16-1-1-1-B	2.48
UPL 87	26.22	abcdefghij		SA24-SARI	3.06667	bcdefghi		HR32068F1-3-10-1	1.97	abc		ART64-31-1-1-B-B	6.35751	abcdefghi		ART105-3-1-2-B-B	2.34	bcdefghij		SA68-SARI	2.5	abcd		SA20-SARI	10.89	def		SR35266-2-17-1-1	10.4433	abcdefghijklm		AFRICARICE 6	22.5275	abcdefgh		SA4-SARI	82.6667	abcdefghi		Toxx3377	117	cdefg		HR32066F1-4-16-1	68.7767	abcdef		UPL 32	2.47667
ART478-13-8-1-1-B	26.2133	abcdefghij		SR35311-HB3497-87	3.05	bcdefghi		ART478-13-8-1-1-B	1.97	abc		AFRICARICE 4	6.35742	abcdefghi		SR35311-HB3497-87	2.34	bcdefghij		IDSA85	2.5	abcd		ART125-26-1-1-B-B	10.89	def		SR34590-HB 3433-5-1-1	10.4433	abcdefghijklm		SA28-SARI	22.5265	abcdefgh		SR35329-HB3509-91	82.6667	abcdefghi		ART100-57-1-2-B-B	117	cdefg		SR35266-2-11-1-1	68.6667	abcdef		DigJas-61	2.47667
HR32068F1-3-10-1	26.2	abcdefghij		ART58-46-1-1-B-B	3.03333	bcdefghi		UPL 87	1.97	abc		UPL 32	6.35629	abcdefghi		SA20-SARI	2.338	bcdefghij		SR35266-2-11-4-1	2.5	abcd		SA62-SARI	10.89	def		ART75-33-1-1-B-B	10.4433	abcdefghijklm		ART216-212-B-1-B-B	22.382	abcdefgh		DigJas-61	82.3333	abcdefghi		CRI-AgraRice	117	cdefg		SR34796-1-4-6-3-2-1	68.5567	abcdef		SA28-SARI	2.47333
SA62-SARI	26.1367	abcdefghij		ART85-48-1-1-B-B	3.03333	bcdefghi		GR18-SARI	1.96667	abc		ART85-48-1-1-B-B	6.35206	abcdefghi		ART125-26-1-1-B-B	2.33533	bcdefghij		ART493-16-1-1-1-B	2.5	abcd		SA26-SARI	10.89	def		ART58-46-1-1-B-B	10.4433	abcdefghijklm		SR35266-2-20-3-1	22.3814	abcdefgh		ART64-31-1-1-B-B	82.3333	abcdefghi		ART93-112-1-1-B-B	116.667	cdefg		SR34590-HB3433-1-3-1	68.4467	abcdef		AFRICARICE 6	2.47
ARICA 3	26	abcdefghij		GR18-SARI	3.03333	bcdefghi		SR34590-HB3433-6-1-1	1.96667	abc		SR35266-2-11-4-1	6.34952	abcdefghi		ART350:2-6-1-B	2.32067	bcdefghij		ART85-48-1-1-B-B	2.5	abcd		ART484-19-1-1-1-B	10.89	def		SA60-SARI	10.4433	abcdefghijklm		SA65-SARI	22.3486	abcdefgh		SA65-SARI	82.3333	abcdefghi		SA9-SARI	116.667	cdefg		SR34590-HB3433-8-2-1	68.4433	abcdef		WAB 2135-WAC B-2-TGR3-WAT8-3	2.46667
SR34590-HB3433-6-1-1	26	abcdefghij		HR32068F1-3-10-1	3.03333	bcdefghi		SR35266-2-17-1-1	1.96667	abc		ART216-212-B-1-B-B	6.34896	abcdefghi		SR34034F3-71-2-1-1-3	2.31867	bcdefghij		AFRICARICE 4	2.5	abcd		SR34034F3-71-2-1-1-3	10.8867	def		SA68-SARI	10.4433	abcdefghijklm		SR35250-1-23-2-1	22.3294	abcdefgh		SA31-SARI	82.3333	abcdefghi		SA54-SARI	116.667	cdefg		SR35266-2-19-1-1	68.1133	abcdef		SR34590-HB3433-8-2-1	2.46667
SR35266-2-17-1-1	25.94	abcdefghij		SR35266-2-19-1-1	3.03333	bcdefghi		SR34590-HB 3433-5-1-1	1.96333	abc		SA54-SARI	6.3418	abcdefghi		ART58-46-1-1-B-B	2.31667	bcdefghij		AgKE99-26	2.5	abcd		SR35266-2-12-1-1	10.8333	def		SR34034F3-71-2-1-1-3	10.4433	abcdefghijklm		228	22.3229	abcdefgh		SR35266-2-12-4-1	82.1667	bcdefghi		SR34590-HB-3433-7-1-1	116.333	cdefg		HR32080-HB3567-4	68.11	abcdef		SR35250-1-23-2-1	2.46333
ART350:2-6-1-B	25.9067	abcdefghij		HR32067F1-2-14-1	3.03333	bcdefghi		ART75-33-1-1-B-B	1.96	abc		SR34590-HB3433-8-2-1	6.34112	abcdefghi		ART483-10-1-1-1-B	2.31467	bcdefghij		N1	2.5	abcd		ART75-33-1-1-B-B	10.78	def		SA24-SARI	10.4433	abcdefghijklm		TV1	22.2328	abcdefgh		AGRA-SARI	82	bcdefghi		ART245-1-40-1-B-B	116	cdefg		HR32046F1-2-261	68.11	abcdef		ART216-212-B-1-B-B	2.45667
SR34034F3-71-2-1-1-3	25.8033	abcdefghij		ART125-26-1-1-B-B	3.03333	bcdefghi		ART75-57-1-1-B-B	1.96	abc		SR35266-2-11-1-1	6.34045	abcdefghi		ARICA 3	2.312	bcdefghij		WAB 2135-WAC B-2-TGR3-WAT8-3	2.5	abcd		ARICA 3	10.78	def		ART483-10-1-1-1-B	10.39	abcdefghijklm		SR34590-HB3433-8-2-1	22.2289	abcdefgh		TV1	82	bcdefghi		IR 84105-B-B-B-TGR4	115.667	cdefg		SR35266-2-16-2-1	68.11	abcdef		228	2.45333
SR33705F2-61-3-2-HV-1-1	25.8	abcdefghij		ART350:2-6-1-B	3.01667	bcdefghi		SR35278-1-9-3-1	1.96	abc		TV1	6.33479	abcdefghi		ART75-33-1-1-B-B	2.308	bcdefghij		SR35250-1-23-2-1	2.5	abcd		ART58-46-1-1-B-B	10.78	def		SR35266-2-18-1-1	10.3333	bcdefghijklm		IDSA85	22.1935	abcdefgh		Viwornor short	82	bcdefghi		FKR 62N	115.667	cdefg		HR32069F1-3-5-1	67.8867	abcdef		SR35266-2-11-4-1	2.45333
SR35278-1-9-3-1	25.7067	abcdefghij		SR34034F3-71-2-1-1-3	3.01667	bcdefghi		SR35311-HB3497-87	1.96	abc		SR35266-2-20-3-1	6.33284	abcdefghi		GR18-SARI	2.306	bcdefghij		SR35266-2-11-1-1	2.5	abcd		SA68-SARI	10.78	def		SR35266-2-12-1-1	10.3333	bcdefghijklm		SR35266-2-11-4-1	22.1916	abcdefgh		HR32080-HB3567-4	81.6667	bcdefghi		ART245-1-16-1-B-B	115.667	cdefg		ART105-3-1-2-B-B	67.78	abcdef		SA65-SARI	2.45
ART75-33-1-1-B-B	25.68	abcdefghij		SR35266-2-18-1-1	3.01667	bcdefghi		WAB 2138-WAC B-2-TGR2-WAT5-1	1.95667	abc		IDSA85	6.31912	abcdefghi		SR35266-2-16-1-1	2.30467	cdefghij		SR35266-2-20-3-1	2.5	abcd		SA60-SARI	10.78	def		ART108-2-1-1-B-B	10.33	bcdefghijklm		SR34590-HB3433-1-3-1	22.1421	abcdefgh		JKE56-3	81.6667	bcdefghi		ART174-2-1-1-B-B	115.667	cdefg		KBR V4	67.67	abcdef		SR35266-2-19-1-1	2.45
ART75-57-1-1-B-B	25.66	abcdefghij		ART478-13-8-1-1-B	3.01667	bcdefghi		SR35266-2-19-1-1	1.95667	abc		Obolo	6.28069	abcdefghi		SA60-SARI	2.3026	cdefghij		SR35266-2-11-4-1-1	2.5	abcd		SR35266-2-18-1-1	10.7767	def		ART75-57-1-1-B-B	10.33	bcdefghijklm		SR35266-2-12-1-1	22.1344	abcdefgh		KBR V4	81.6667	bcdefghi		SR35329-HB3509-91	115.667	cdefg		SR35266-2-12-1-1	67.6667	abcdef		IDSA85	2.44667
SR35311-HB3497-87	25.64	abcdefghij		SR35266-2-16-1-1	3.00833	cdefghi		SA68-SARI	1.95	abc		AgKE99-26	6.27198	abcdefghi		SR35266-2-18-1-1	2.29933	cdefghij		SAHEL 134	2.5	abcd		GR18-SARI	10.7767	def		SR35311-HB3497-87	10.33	bcdefghijklm		WAB 2135-WAC B-2-TGR3-WAT8-3	22.0566	abcdefgh		CRI-1-11-15-5	81.6667	bcdefghi		SR34053(#5-52)-1-4-2-10-3-1	115.333	cdefg		SA64-SARI	67.6633	abcdef		ART105-3-1-2-B-B	2.44667
WAB 2138-WAC B-2-TGR2-WAT5-1	25.56	abcdefghij		ART75-33-1-1-B-B	3	cdefghi		SA60-SARI	1.95	abc		ART105-3-1-2-B-B	6.26304	abcdefghi		SA68-SARI	2.29867	cdefghij		Obolo	2.49539	abcd		SR33705F2-61-3-2-HV-1-1	10.7233	def		SR35278-1-9-3-1	10.33	bcdefghijklm		ART493-16-1-1-1-B	21.9669	abcdefgh		DigJas-3	81.3333	bcdefghi		Digang	115	cdefg		Jasmine 85-CRI	67.3867	abcdef		SR34590-HB3433-1-3-1	2.44333
SR35266-2-19-1-1	25.4467	abcdefghij		ARICA 3	3	cdefghi		SR34034F3-71-2-1-1-3	1.95	abc		SA65-SARI	6.26049	abcdefghi		ART478-13-8-1-1-B	2.29467	cdefghij		SR35266-2-18-2-1	2.4804	abcd		SR35266-2-16-1-1	10.6683	def		WAB 2138-WAC B-2-TGR2-WAT5-1	10.33	bcdefghijklm		SR35266-2-19-1-1	21.7518	abcdefgh		AGRA-CRI-LOL-2-27	81.3333	bcdefghi		ART75-30-1-1-B-B	115	cdefg		IDS 85	67.3333	abcdef		TV1	2.44333
SR35266-2-18-1-1	25.3667	abcdefghij		SR33705F2-61-3-2-HV-1-1	3	cdefghi		SR35266-2-18-1-1	1.95	abc		SAHEL 134	6.25354	abcdefghi		ART75-57-1-1-B-B	2.294	cdefghij		SR35266-2-12-1-1	2.47191	abcd		SR34590-HB3433-1-3-1-1	10.6667	def		ART85-48-1-1-B-B	10.2233	bcdefghijklm		SR35266-2-18-2-1	21.7025	abcdefgh		SR35266-2-4-4-1	81.3333	bcdefghi		KBR V4	115	cdefg		HR32069F1-2-4-1	67.3333	abcdef		SR35266-2-12-1-1	2.43667
SR35266-2-16-1-1	25.305	bcdefghij		SR35266-2-12-1-1	3	cdefghi		SA10-SARI	1.94667	abc		ART397-3-2-1-1-B	6.23022	abcdefghi		SR35266-2-12-1-1	2.28067	cdefghij		SR34590-HB3433-1-3-1	2.46943	abcd		SR35278-2-10-1-3	10.6667	def		ART120-26-1-1-B-B	10.2233	bcdefghijklm		AgKE99-26	21.6174	abcdefgh		SA61-SARI	81.3333	bcdefghi		SA4-SARI	115	cdefg		SR35266-2-11-4-1	67.3333	abcdef		ART397-3-2-1-1-B	2.42667
SR35266-2-12-1-1	25.1267	bcdefghij		ART75-57-1-1-B-B	3	cdefghi		ART108-2-1-1-B-B	1.94667	abc		SR35266-2-18-2-1	6.2121	abcdefghi		WAB 2135-WAC B-2-TGR3-WAT8-3	2.27867	cdefghij		UPL 6	2.46667	abcd		SR35266-2-20-3-1	10.6667	def		SR33705F2-60-1-2-HV-1-2	10.2233	bcdefghijklm		SAHEL 134	21.528	abcdefgh		AGRA-CRI-LOL-2-29	81	bcdefghi		SA65-SARI	115	cdefg		ART397-3-2-1-1-B	66.8867	abcdef		SR35266-2-18-2-1	2.425
SA60-SARI	25.04	bcdefghij		WAB 2135-WAC B-2-TGR3-WAT8-3	3	cdefghi		SR35266-2-16-1-1	1.945	bc		ART493-16-1-1-1-B	6.21035	abcdefghi		HR32067F1-2-14-1	2.27813	cdefghij		ART143-150-B-1-B-B	2.46667	abcd		ART478-13-8-1-1-B	10.6667	def		HR32067F1-2-14-1	10.2233	bcdefghijklm		ART105-3-1-2-B-B	21.4437	abcdefgh		AGRA-CRI-LOL-1-21	81	bcdefghi		Viwornor short	115	cdefg		AgKE99-26	66.7767	abcdef		AgKE99-26	2.42
SA68-SARI	24.9733	bcdefghij		SA68-SARI	3	cdefghi		ART120-26-1-1-B-B	1.94333	bc		SA21-SARI	6.20308	abcdefghi		SR35266-2-20-3-1	2.27467	cdefghij		SA65-SARI	2.46667	abcd		ART75-57-1-1-B-B	10.6567	def		WAB 2135-WAC B-2-TGR3-WAT8-3	10.22	bcdefghijklm		Obolo	21.4186	abcdefgh		ARICA 2	81	bcdefghi		SR35266-2-17-2-1	114.667	cdefg		SA28-SARI	66.5567	abcdef		Obolo	2.41667
SR34590-HB3433-1-3-1	24.9567	bcdefghij		SA60-SARI	3	cdefghi		ART478-8-1-1-1-B	1.94333	bc		SR34590-HB3433-1-3-1	6.19869	abcdefghi		SR35250-1-23-2-1	2.262	cdefghij		ART105-3-1-2-B-B	2.46667	abcd		SR35250-1-23-2-1	10.5567	def		SR35250-1-23-2-1	10.22	bcdefghijklm		ART85-48-1-1-B-B	21.3415	abcdefgh		N1	81	bcdefghi		SR35266-2-11-4-1-1	114.333	cdefg		SA21-SARI	66.3333	abcdef		SAHEL 134	2.41
SA10-SARI	24.94	bcdefghij		SR35250-1-23-2-1	2.98333	cdefghi		ART68-12-1-1-B-B	1.94333	bc		SR35266-2-12-1-1	6.19743	abcdefghi		SR35278-2-10-1-3	2.26	cdefghij		SA54-SARI	2.46667	abcd		WAB 2135-WAC B-2-TGR3-WAT8-3	10.5567	def		SR35266-2-20-3-1	10.22	bcdefghijklm		SA21-SARI	21.2045	abcdefgh		SA64-SARI	81	bcdefghi		ART152-3-1-1-B-B	114.333	cdefg		Obolo	65.17	abcdef		SA21-SARI	2.40333
ART108-2-1-1-B-B	24.8	bcdefghij		SR35266-2-20-3-1	2.98333	cdefghi		SA56-SARI	1.94	bc		ART143-150-B-1-B-B	6.19173	abcdefghi		SR33705F2-61-3-2-HV-1-1	2.25733	cdefghij		SR34796-1-4-6-3-2-1	2.46667	abcd		SR34590-HB3433-1-3-1	10.5567	def		SA56-SARI	10.22	bcdefghijklm		ART397-3-2-1-1-B	21.1777	abcdefgh		SR35266-2-17-2-1	80.6667	bcdefghi		SA61-SARI	114.333	cdefg		SR35266-2-18-2-1	64.7767	bcdef		ART143-150-B-1-B-B	2.39667
ART112-85-1-1-B-B	24.7167	bcdefghij		SR34590-HB3433-1-3-1	2.98333	cdefghi		SR35266-2-12-1-1	1.94	bc		UPL 6	6.17319	abcdefghi		SA56-SARI	2.24867	cdefghij		SA39-SARI	2.46667	abcd		SA56-SARI	10.5567	def		SR35266-2-16-1-1	10.1667	cdefghijklm		SR34796-1-4-6-3-2-1	20.9872	abcdefgh		SR35266-2-11-4-1-1	80.6667	bcdefghi		SA64-SARI	114.333	cdefg		SR33705F2-60-1-1HV-1-1	64.4433	bcdef		UPL 6	2.39333
ART120-26-1-1-B-B	24.7133	bcdefghij		SA10-SARI	2.96667	cdefghi		SR33705F2-61-3-2-HV-1-1	1.94	bc		SR34796-1-4-6-3-2-1	6.1725	abcdefghi		UPL 30	2.23867	cdefghij		ART397-3-2-1-1-B	2.46667	abcd		HR32067F1-2-14-1	10.5533	def		ART68-12-1-1-B-B	10.1133	cdefghijklm		SA39-SARI	20.9292	abcdefgh		SR34042F3-22-1-1-5-3	80.6667	bcdefghi		ART248-1-97-1-B-B	114.333	cdefg		ART143-150-B-1-B-B	64.33	bcdef		SA39-SARI	2.38333
SA37-SARI	24.6667	bcdefghij		SA37-SARI	2.96667	cdefghi		WAB 2135-WAC B-2-TGR3-WAT8-3	1.94	bc		SR35266-2-19-1-1	6.16155	abcdefghi		SR35266-2-18-3-1	2.23467	cdefghij		SA20-SARI	2.46116	abcd		ART112-85-1-1-B-B	10.4467	def		ART478-8-1-1-1-B	10.1133	cdefghijklm		HR32080-HB3567-4	20.7436	abcdefgh		ART93-112-1-1-B-B	80.6667	bcdefghi		N1	114.333	cdefg		SA39-SARI	64.2233	bcdef		SA20-SARI	2.37667
SR35266-2-20-3-1	24.6567	bcdefghij		SA56-SARI	2.96667	cdefghi		SR35266-2-20-3-1	1.94	bc		SA39-SARI	6.15873	abcdefghi		SR3305F2-60-2-2-HV-1-1	2.22333	cdefghij		SA21-SARI	2.46087	abcd		SR35311-HB3497-4	10.4433	def		SR33705F2-61-3-2-HV-1-1	10.11	cdefghijklm		SA64-SARI	20.7417	abcdefgh		KBR 10	80.6667	bcdefghi		JKE56-30	114	cdefg		SA60-SARI	63.78	bcdef		SR35266-2-20-3-1-1	2.37667
SR35278-2-10-1-3	24.6133	bcdefghij		SR35278-2-10-1-3	2.96667	cdefghi		SA37-SARI	1.94	bc		SA20-SARI	6.15267	abcdefghi		SA10-SARI	2.21733	cdefghij		SA26-SARI	2.45645	abcd		SR3305F2-60-2-2-HV-1-1	10.4433	def		SR3305F2-60-2-2-HV-1-1	10.11	cdefghijklm		SA20-SARI	20.6746	abcdefgh		SR35276-2-4-3-1-1	80.6667	bcdefghi		DigJas-61	113.667	cdefg		SR35266-2-20-3-1-1	63.5567	bcdef		SR34796-1-4-6-3-2-1	2.37333
ART68-12-1-1-B-B	24.6	bcdefghij		UPL 30	2.96667	cdefghi		SR35250-1-23-2-1	1.93667	bc		SA30-SARI	6.14652	abcdefghi		SA37-SARI	2.21533	cdefghij		SA30-SARI	2.456	abcd		UPL 30	10.43	def		UPL 30	10.11	cdefghijklm		SR35266-2-20-3-1-1	20.6105	abcdefgh		CRI-AMANKWATIA	80.6667	bcdefghi		ART64-31-1-1-B-B	113.667	cdefg		SA68-SARI	63.4433	bcdef		HR32080-HB3567-4	2.37
SA56-SARI	24.58	bcdefghij		SA17-SARI	2.95	cdefghi		SA17-SARI	1.93333	bc		SA64-SARI	6.11784	abcdefghi		SR35311-HB3497-4	2.21267	cdefghij		SA55-SARI	2.45277	abcd		SR35266-2-18-3-1	10.39	def		ART90-12-1-1-B-B	10.0567	cdefghijklm		SA30-SARI	20.5826	abcdefgh		CRI-1-11-15-21	80.3333	bcdefghi		SR34796-1-4-6-3-2-1	113.667	cdefg		SR35266-2-20-1-1	62.7233	bcdef		SA30-SARI	2.36667
ART478-8-1-1-1-B	24.54	bcdefghij		ART108-2-1-1-B-B	2.95	cdefghi		SR34590-HB3433-1-3-1	1.93333	bc		HR32080-HB3567-4	6.11683	abcdefghi		ART108-2-1-1-B-B	2.2106	cdefghij		SR35266-2-17-1-1	2.43333	abcd		SR23364-133-17-1-HV-1-2	10.3333	def		SA10-SARI	10	cdefghijklm		ART143-150-B-1-B-B	20.5265	abcdefgh		ART75-14-1-2-B-B	80	bcdefghi		CRI-1-11-15-5	113.667	cdefg		SR35276-2-4-3-2	62.5567	bcdef		SA26-SARI	2.36667
SR35250-1-23-2-1	24.5267	bcdefghij		ART68-12-1-1-B-B	2.95	cdefghi		SR34590-HB3433-1-3-1-1	1.93	bc		SA26-SARI	6.11582	abcdefghi		SA17-SARI	2.206	cdefghij		SR33705F2-60-1-1HV-1-1	2.43333	abcd		SA10-SARI	10.33	def		CRI-1-11-19-12	10	cdefghijklm		KBR V4	20.4818	abcdefgh		CRI-AgraRice	80	bcdefghi		DigJas-3	113.333	defg		SR35250-1-23-2-1	62.2233	bcdef		SR35266-2-20-1-1	2.36333
SA17-SARI	24.4667	bcdefghij		ART120-26-1-1-B-B	2.93333	cdefghi		UPL 30	1.93	bc		SA55-SARI	6.10528	abcdefghi		ART120-26-1-1-B-B	2.20467	cdefghij		SR34590-HB3433-6-1-1	2.43333	abcd		SA37-SARI	10.33	def		SA17-SARI	10	cdefghijklm		UPL 6	20.4726	abcdefgh		SR34796-1-4-6-3-2-1	80	bcdefghi		KBR 12	113.333	defg		UPL 6	61.7767	bcdef		KBR V4	2.36
WAB 2135-WAC B-2-TGR3-WAT8-3	24.3267	bcdefghij		SR3305F2-60-2-2-HV-1-1	2.93333	cdefghi		ART75-56-1-2-B-B	1.92333	bc		SA62-SARI	6.07284	abcdefghi		ART478-8-1-1-1-B	2.202	cdefghij		SA64-SARI	2.43333	abcd		ART120-26-1-1-B-B	10.33	def		SA37-SARI	10	cdefghijklm		SA55-SARI	20.3755	abcdefgh		Enapa	80	bcdefghi		Tog7291	113.333	defg		WAB 2135-WAC B-2-TGR3-WAT8-3	61.67	bcdef		ART108-2-1-1-B-B	2.35667
UPL 30	23.9267	bcdefghij		ART478-8-1-1-1-B	2.93333	cdefghi		ART112-85-1-1-B-B	1.92333	bc		KBR V4	6.06278	abcdefghi		ART68-12-1-1-B-B	2.202	cdefghij		SA62-SARI	2.43333	abcd		SA17-SARI	10.33	def		SA13-SARI	10	cdefghijklm		SA26-SARI	20.3741	abcdefgh		KBR 12	79.6667	bcdefghi		SAHEL 134	113	efg		SA20-SARI	61.22	bcdef		SR35276-2-4-3-2	2.35667
SR35266-2-18-3-1	23.86	bcdefghij		SR35266-2-18-3-1	2.93333	cdefghi		ART350:10-2-1-B	1.92333	bc		ART108-2-1-1-B-B	6.04649	abcdefghi		SR34590-HB3433-1-3-1	2.19467	cdefghij		SR35266-2-19-1-1	2.43333	abcd		ART108-2-1-1-B-B	10.33	def		SA35-SARI	10	cdefghijklm		SR35266-2-20-1-1	20.2307	abcdefgh		FKR 62N	79.6667	bcdefghi		NERICA-L 41	113	efg		SA26-SARI	61.11	bcdef		SA64-SARI	2.35667
SR3305F2-60-2-2-HV-1-1	23.84	bcdefghij		SR35311-HB3497-4	2.9	cdefghi		SR3305F2-60-2-2-HV-1-1	1.92	bc		ART120-26-1-1-B-B	6.03942	abcdefghi		SR35266-2-12-2-1	2.16733	cdefghij		ART120-26-1-1-B-B	2.4	abcd		ART68-12-1-1-B-B	10.2767	def		SA58-SARI	10	cdefghijklm		SR35276-2-4-3-2	20.1611	abcdefgh		NERICA-L 41	79.6667	bcdefghi		HR32080-HB3567-4	113	efg		SA30-SARI	60.9967	bcdef		SA55-SARI	2.35
ART350:10-2-1-B	23.6133	bcdefghij		ART112-85-1-1-B-B	2.9	cdefghi		ART90-12-1-1-B-B	1.91667	bc		SR35266-2-20-1-1	6.03052	abcdefghi		SA58-SARI	2.16733	cdefghij		KBR V4	2.4	abcd		ART478-8-1-1-1-B	10.2767	def		ART350:10-2-1-B	10	cdefghijklm		SA62-SARI	20.1047	abcdefgh		AGRA-CRI-LOL-1-11	79.3333	bcdefghi		KBR 10	113	efg		SA55-SARI	60.6667	bcdef		SA62-SARI	2.35
ART75-56-1-2-B-B	23.4133	bcdefghij		SR23364-128-1835-1-HV-1-1	2.86667	cdefghi		SR35266-2-18-3-1	1.91667	bc		SR35266-2-20-3-1-1	6.02873	abcdefghi		ART90-12-1-1-B-B	2.16333	cdefghij		ART108-2-1-1-B-B	2.4	abcd		SR35266-2-12-2-1	10.2233	def		SA50-SARI	10	cdefghijklm		SR34590-HB3433-6-1-1	19.9726	abcdefgh		SAHEL 134	79	cdefghi		Togo Marshall	112.667	efg		SA62-SARI	60.3367	bcdef		ART120-26-1-1-B-B	2.34333
SR23364-133-17-1-HV-1-2	23.4067	bcdefghij		SA13-SARI	2.86667	cdefghi		SA13-SARI	1.91333	bc		SR35276-2-4-3-2	6.0259	abcdefghi		SR23364-128-1835-1-HV-1-1	2.16	cdefghij		SR35266-2-20-1-1	2.4	abcd		SR23364-128-1835-1-HV-1-1	10.2233	def		ART75-56-1-2-B-B	10	cdefghijklm		SR33705F2-60-1-1HV-1-1	19.9275	abcdefgh		CRI-Emopa	79	cdefghi		AGRA-CRI-LOL-2-29	112.667	efg		SR34590-HB3433-6-1-1	59.3367	bcdef		SR34590-HB3433-6-1-1	2.33333
ART90-12-1-1-B-B	23.3767	bcdefghij		SR35266-2-12-2-1	2.86667	cdefghi		CRI-1-11-19-12	1.91333	bc		ART478-8-1-1-1-B	6.02192	abcdefghi		SA50-SARI	2.15467	cdefghij		SR34598-HB-16-HV-1-1	2.4	abcd		SA58-SARI	10.1667	def		ART112-85-1-1-B-B	9.94333	cdefghijklm		SR35266-2-17-1-1	19.7622	abcdefgh		Gigante-SARI	79	cdefghi		NERICA-L 19	112.667	efg		SA34-SARI	59	bcdef		ART68-12-1-1-B-B	2.33
CRI-1-11-19-12	23.3467	bcdefghij		CRI-1-11-19-12	2.86667	cdefghi		SA58-SARI	1.91	bc		SR34590-HB3433-6-1-1	6.01606	abcdefghi		ART75-56-1-2-B-B	2.15067	cdefghij		SAHEL 177	2.4	abcd		ART90-12-1-1-B-B	10.1667	def		SR34590-HB3433-1-3-1-1	9.88667	cdefghijklm		ART108-2-1-1-B-B	19.6386	abcdefgh		NERICA-L 19	79	cdefghi		Gigante-SARI	112.667	efg		ART125-26-1-1-B-B	58.4433	bcdef		SR35266-2-17-1-1	2.32667
SA13-SARI	23.3067	bcdefghij		SA58-SARI	2.86667	cdefghi		SR35278-2-10-1-3	1.91	bc		SR33705F2-60-1-1HV-1-1	5.99796	abcdefghi		ART112-85-1-1-B-B	2.14533	cdefghij		SR35276-2-4-3-2	2.4	abcd		SA50-SARI	10.1667	def		SR23364-133-17-1-HV-1-2	9.83667	cdefghijklm		ART120-26-1-1-B-B	19.63	abcdefgh		JKE56-30	79	cdefghi		AGRA-CRI-LOL-2-27	112.667	efg		SA63-SARI	58.3333	bcdef		SR33705F2-60-1-1HV-1-1	2.32667
SR23364-128-1835-1-HV-1-1	23.24	bcdefghij		SR35278-2-10-1-2	2.86667	cdefghi		SA50-SARI	1.91	bc		SR35266-2-17-1-1	5.96062	abcdefghi		SR34590-HB3433-1-3-1-1	2.14333	cdefghij		SR35266-2-20-3-1-1	2.4	abcd		CRI-1-11-19-12	10.0567	def		SA59-SARI	9.78	cdefghijklm		ART478-8-1-1-1-B	19.3679	abcdefgh		Tog7291	79	cdefghi		SA51-SARI	112.667	efg		SR35266-2-17-1-1	58.33	bcdef		ART478-8-1-1-1-B	2.32667
SA50-SARI	23.24	bcdefghij		ART90-12-1-1-B-B	2.86667	cdefghi		SA59-SARI	1.90667	bc		ART68-12-1-1-B-B	5.93311	abcdefghi		ART350:10-2-1-B	2.14267	cdefghij		ART478-8-1-1-1-B	2.4	abcd		SA13-SARI	10.0567	def		SR23364-128-1835-1-HV-1-1	9.77667	cdefghijklm		SR35278-1-9-3-1	19.1606	abcdefgh		SA22-SARI	79	cdefghi		AGRA-CRI-LOL-1-21	112.667	efg		SAHEL 177	58	bcdef		SR35278-1-9-3-1	2.31
SR35311-HB3497-4	23.1667	bcdefghij		ART350:10-2-1-B	2.86667	cdefghi		SR23364-128-1835-1-HV-1-1	1.90333	bc		SR35278-1-9-3-1	5.91559	abcdefghi		SA59-SARI	2.14	cdefghij		SA63-SARI	2.4	abcd		ART350:10-2-1-B	10.0567	def		SR34590-HB3433-1-3-1	9.77667	cdefghijklm		SA34-SARI	19.1155	abcdefgh		ART90-9-1-1-B-B	79	cdefghi		CRI-AMANKWATIA	112.667	efg		ART108-2-1-1-B-B	57.5567	bcdef		SA34-SARI	2.29667
SA58-SARI	23.14	bcdefghij		ART75-56-1-2-B-B	2.86667	cdefghi		SA35-SARI	1.9	bc		SA34-SARI	5.90979	abcdefghi		CRI-1-11-19-12	2.138	cdefghij		SA34-SARI	2.4	abcd		SR35278-2-10-1-2	10.0567	def		SR35266-2-18-3-1	9.77667	cdefghijklm		SAHEL 177	18.9845	abcdefgh		CRI-Oboafo	78.6667	defghi		ARICA 2	112.667	efg		ART120-26-1-1-B-B	57.4433	bcdef		SR35311-HB3497-87	2.28333
SA59-SARI	22.95	bcdefghij		SA50-SARI	2.86667	cdefghi		SR35311-HB3497-4	1.89	bc		SA63-SARI	5.86879	bcdefghi		SA13-SARI	2.13333	cdefghij		HR32080-HB3567-4	2.4	abcd		SA59-SARI	10.0567	def		SR35278-2-10-1-3	9.55667	defghijklm		SA63-SARI	18.9106	abcdefgh		AGRA-CRI-LOL-1-7	78.6667	defghi		SA2-SARI	112.667	efg		SR34598-HB-16-HV-1-1	57.33	bcdef		SAHEL 177	2.27
SA35-SARI	22.9367	bcdefghij		SA59-SARI	2.85	cdefghi		SR35278-2-10-1-2	1.89	bc		SAHEL 177	5.85975	cdefghi		SR35278-2-10-1-2	2.13333	cdefghij		SR35278-1-9-3-1	2.36667	abcd		ART75-56-1-2-B-B	10.0567	def		SR35266-2-12-2-1	9.5	defghijklm		SR34598-HB-16-HV-1-1	18.6488	abcdefgh		Togo Marshall	78.6667	defghi		CRI-1-11-15-21	112.333	efg		SR35278-1-9-3-1	57	bcdef		SA63-SARI	2.27
SR35266-2-12-2-1	22.9	bcdefghij		SA35-SARI	2.83333	cdefghi		SA41-SARI	1.89	bc		SR35311-HB3497-87	5.85379	cdefghi		SA35-SARI	2.132	cdefghij		WAB 2138-WAC B-2-TGR2-WAT5-1	2.36667	abcd		SA35-SARI	10	def		SA41-SARI	9.5	defghijklm		ART68-12-1-1-B-B	18.5637	abcdefgh		SA51-SARI	78.6667	defghi		CRI-Emopa	112	fg		ART478-8-1-1-1-B	56.3367	bcdef		ART125-26-1-1-B-B	2.26667
SR35278-2-10-1-2	22.6067	bcdefghij		SR23364-133-17-1-HV-1-2	2.8	cdefghi		SR35266-2-12-2-1	1.88667	bc		WAB 2138-WAC B-2-TGR2-WAT5-1	5.80943	cdefghi		SR35250-2-3-1-1	2.09333	cdefghij		SR35311-HB3497-87	2.36667	abcd		SR35250-2-3-1-1	10	def		SR35311-HB3497-4	9.39	efghijklm		SR35311-HB3497-87	18.2925	bcdefgh		SA2-SARI	78.3333	defghi		CRI-Oboafo	112	fg		SR35311-HB3497-87	56	bcdef		WAB 2138-WAC B-2-TGR2-WAT5-1	2.26333
SA41-SARI	22.5733	cdefghij		SA41-SARI	2.8	cdefghi		SR23364-133-17-1-HV-1-2	1.88667	bc		ART125-26-1-1-B-B	5.78816	cdefghi		SR23364-133-17-1-HV-1-2	2.07933	cdefghij		ART68-12-1-1-B-B	2.36667	abcd		SA41-SARI	9.94333	def		SR35250-2-3-1-1	9.27667	fghijklm		WAB 2138-WAC B-2-TGR2-WAT5-1	17.7583	cdefgh		CRI-Kantinka	78.3333	defghi		AGRA-CRI-LOL-1-7	112	fg		ART68-12-1-1-B-B	55.6667	bcdef		SR34598-HB-16-HV-1-1	2.26
SR35250-2-3-1-1	22.22	defghij		SR35250-2-3-1-1	2.8	cdefghi		SR35250-2-3-1-1	1.87	bc		SR34598-HB-16-HV-1-1	5.76182	cdefghi		SR35278-1-7-2-2	2.03933	defghij		ART125-26-1-1-B-B	2.33333	abcd		SR35278-1-7-2-2	9.94333	def		SR35278-2-10-1-2	9.11333	ghijklm		ART125-26-1-1-B-B	17.7542	cdefgh		SR34590-HB-3433-7-1-1	78	efghi		AgKE99-56	112	fg		ART58-46-1-1-B-B	55.2233	bcdef		ART58-46-1-1-B-B	2.25333
SA25-SARI	21.9167	efghij		SR35278-1-7-2-2	2.8	cdefghi		SR35278-1-7-2-2	1.85667	bc		ART58-46-1-1-B-B	5.67127	cdefghi		SA41-SARI	2.038	defghij		ART58-46-1-1-B-B	2.3	bcd		SA25-SARI	9.44667	ef		SA25-SARI	8.88667	hijklm		ART58-46-1-1-B-B	16.6046	cdefgh		AGRA-CRI-LOL-2-7	78	efghi		CRI-Mpuntuo	112	fg		WAB 2138-WAC B-2-TGR2-WAT5-1	55.11	bcdef		UPL 87	2.19333
SR35278-1-7-2-2	21.7367	fghij		SA25-SARI	2.73333	defghi		SA25-SARI	1.84333	bc		WAB 2101-WAC4-1-TGR1-WAT3-5-TGR2	5.64273	defghi		WAIQ1-SARI	1.858	efghij		WAB 2101-WAC4-1-TGR1-WAT3-5-TGR2	2.3	bcd		SR33705F2-61-1-3-HV-1-1	9.39	ef		SR35278-1-7-2-2	8.83333	hijklm		UPL 87	16.5587	cdefgh		IR 84105-B-B-B-TGR4	77	fghi		AGRA-CRI-LOL-2-7	112	fg		UPL 87	52.78	bcdef		WAB 2101-WAC4-1-TGR1-WAT3-5-TGR2	2.18333
SR33705F2-61-1-3-HV-1-1	21.4433	ghij		SR33705F2-61-1-3-HV-1-1	2.61667	efghi		SR33705F2-61-1-3-HV-1-1	1.82	bc		UPL 87	5.61168	efghi		SR33705F2-61-1-3-HV-1-1	1.758	fghij		UPL 87	2.3	bcd		ART85-48-1-1-B-B	9.33333	ef		SR33705F2-61-1-3-HV-1-1	8.55333	ijklm		WAB 2101-WAC4-1-TGR1-WAT3-5-TGR2	16.5359	defgh		CRI-Mpuntuo	77	fghi		CRI-Kantinka	112	fg		WAB 2101-WAC4-1-TGR1-WAT3-5-TGR2	52.4433	bcdef		ARICA 3	2.16
SA52-SARI	21.4333	ghij		SA14-SARI	2.53333	fghi		SA52-SARI	1.80667	bc		ARICA 3	5.47534	fghi		SA25-SARI	1.72467	ghij		ARICA 3	2.23333	bcd		SA14-SARI	9.05333	ef		SA14-SARI	8.22	jklm		ARICA 3	14.9835	efgh		KBR 2	75.6667	ghi		AGRA-CRI-LOL-1-11	112	fg		ARICA 3	50.33	cdef		ART350:2-6-1-B	2.12
SA14-SARI	21.1733	hij		WAB 2085-TGR2-WAT4-1-1	2.5	ghi		WAIQ1-SARI	1.80333	bc		ART350:2-6-1-B	5.41888	ghi		SA52-SARI	1.68133	hij		ART350:2-6-1-B	2.23333	bcd		WAB 2085-TGR2-WAT4-1-1	9.05333	ef		SA52-SARI	8.05333	klm		ART350:2-6-1-B	14.7111	fgh		SR34053(#5-52)-1-4-2-10-1-2	75.6667	ghi		SA38-SARI	112	fg		ART350:2-6-1-B	49.5533	def		ART75-33-1-1-B-B	2.04333
WAB 2085-TGR2-WAT4-1-1	21.06	ij		SA52-SARI	2.46667	hi		SA14-SARI	1.80333	bc		ART75-33-1-1-B-B	5.08037	hi		SA14-SARI	1.59	ij		ART75-33-1-1-B-B	2.03333	cd		SA52-SARI	8.94333	ef		WAB 2085-TGR2-WAT4-1-1	7.88667	lm		ART75-33-1-1-B-B	12.0444	gh		AgKE99-56	74.6667	hi		SR34053(#5-52)-1-4-2-10-1-2	112	fg		ART75-33-1-1-B-B	43.7767	ef		ART85-48-1-1-B-B	1.94
WAIQ1-SARI	20.0067	j		WAIQ1-SARI	2.43333	i		WAB 2085-TGR2-WAT4-1-1	1.78667	c		ART75-57-1-1-B-B	4.89264	i		WAB 2085-TGR2-WAT4-1-1	1.572	j		ART75-57-1-1-B-B	2	d		WAIQ1-SARI	6.88667	f		WAIQ1-SARI	7.39	m		ART75-57-1-1-B-B	11.1845	h		SA38-SARI	71.3333	i		KBR 2	111.333	g		ART75-57-1-1-B-B	41.7767	f		ART75-57-1-1-B-B	1.88333
[truncated: 4 more columns]

## Sheet: Table S3
Table S3: Best Linear Unbiased Prediction (BLUP) of Agro-Morphological Traits in 295 Rice Genotypes.
Rice genotypes	GY	GW	TN	PN	HGW	HD	MD	PH	CL	PL	GT	GL	SLEMMAL	GLWR
228	34.2091	2.69357	12.1891	11.8862	3.55465	85.4941	118.449	93.837	72.327	22.935	2.07053	6.42875	2.56052	2.56481
644 Gold	30.929	2.57844	11.8865	11.4556	3.37641	88.0529	123.424	102.078	77.014	24.6821	2.05923	6.57292	2.62591	2.59675
80 DAYS-SARI	33.1416	2.68222	11.9737	11.6049	3.39012	86.0628	118.741	104.474	78.92	26.2392	2.05923	6.72249	2.6386	2.59675
AFRICARICE 4	29.7551	2.48374	11.4584	11.0738	3.2256	90.0431	124.302	96.5228	71.7177	23.2227	2.03803	6.41828	2.57556	2.54884
AFRICARICE 6	33.7314	2.66238	12.1019	11.7915	3.52723	85.4941	118.741	94.8506	73.1082	23.1207	2.06629	6.43464	2.5661	2.56481
AGRA-CRI-LOL-1-11	37.4603	2.88922	12.7839	12.466	3.80144	80.6609	113.473	123.337	96.1057	30.8663	2.11999	7.2146	2.79777	2.7405
AGRA-CRI-LOL-1-21	36.6892	2.83251	12.5301	12.2708	3.74659	82.0825	114.059	101.849	79.0945	24.936	2.09597	6.60328	2.61871	2.61273
AGRA-CRI-LOL-1-7	37.4028	2.92041	12.9557	12.5607	3.82886	80.0923	113.473	122.809	95.3271	30.3571	2.12282	7.19182	2.78614	2.72453
AGRA-CRI-LOL-2-27	36.6202	2.81266	12.4865	12.1732	3.74659	82.3668	114.059	101.611	79.0945	24.7559	2.09456	6.57401	2.61713	2.59675
AGRA-CRI-LOL-2-29	36.5972	2.83534	12.5301	12.222	3.74659	82.0825	114.059	101.581	79.0346	24.7224	2.09456	6.57698	2.6174	2.59675
AGRA-CRI-LOL-2-7	37.4258	2.9516	13.1249	12.6555	3.85628	79.5237	113.473	122.917	96.0223	30.7105	2.12282	7.20252	2.79195	2.72453
AGRA-SARI	34.5601	2.7843	12.2711	11.8919	3.66433	82.9354	118.156	114.76	88.6429	28.827	2.11858	7.01777	2.74282	2.70856
ARICA 2	36.5742	2.824	12.5301	12.222	3.74659	82.0825	114.059	101.476	78.9226	24.796	2.09456	6.59185	2.61571	2.59675
ARICA 3	26.6074	2.34933	10.9917	10.5945	3.06107	93.1704	129.277	80.8701	56.2662	17.1865	2.01683	5.72086	2.44402	2.42106
ART100-56-1-1-B-B	32.0972	2.63402	11.9301	11.6049	3.33528	87.4843	121.083	107.917	82.0447	27.1917	2.0564	6.80517	2.6651	2.59675
ART100-57-1-2-B-B	33.3516	2.69073	12.0583	11.6996	3.41754	85.2098	117.863	105.151	79.3132	26.2919	2.06205	6.73072	2.63831	2.59675
ART1005-21-1-1-1-B	29.827	2.53478	11.6763	11.3121	3.2256	90.3274	126.643	98.1206	73.6732	23.9685	2.03803	6.62042	2.59762	2.59675
ART101-99-1-2-B-B	28.8113	2.45708	11.4174	11.1226	3.17075	91.4646	126.936	100.351	74.0169	24.7768	2.03096	6.62449	2.6126	2.58078
ART105-3-1-2-B-B	27.8618	2.37315	11.0764	10.6461	3.11591	92.6018	128.107	94.5552	69.8976	22.2883	2.02531	6.34561	2.55668	2.53287
ART108-2-1-1-B-B	25.5716	2.26308	10.6456	10.4509	3.01994	94.8763	131.034	89.0621	61.9115	20.8664	2.00694	6.17511	2.52122	2.50092
ART112-74-1-1-B-B	33.6394	2.7361	12.8711	12.1761	3.55465	84.9255	119.619	109.18	83.8257	27.256	2.07901	6.86658	2.68426	2.64467
ART112-85-1-1-B-B	25.4996	2.20756	10.7354	10.118	2.97881	94.592	131.912	108.867	83.2633	27.1057	1.99705	6.88394	2.67454	2.61476
ART120-26-1-1-B-B	25.4967	2.25803	10.6456	10.3591	3.00623	94.8763	131.034	88.7645	61.8229	20.8627	2.00552	6.1697	2.51679	2.50092
ART125-26-1-1-B-B	27.1138	2.36918	11.0764	10.6461	3.08849	92.6018	128.692	86.5799	62.6041	19.4167	2.02107	5.9732	2.48443	2.46898
ART132-35-1-1-B-B	29.03	2.44064	11.4174	11.1255	3.17075	91.1803	126.058	111.576	85.5183	28.0478	2.03379	6.8964	2.69235	2.61273
ART143-150-B-1-B-B	28.656	2.46956	11.4199	11.025	3.17075	91.4646	127.521	91.6521	67.2025	21.5518	2.03096	6.28646	2.5371	2.53287
ART152-3-1-1-B-B	34.9917	2.74461	12.2711	11.9838	3.60949	83.504	115.522	101.489	77.5322	25.1274	2.07194	6.59464	2.61414	2.58078
ART174-2-1-1-B-B	33.789	2.71342	12.184	11.889	3.45867	84.3569	116.693	105.833	80.0501	26.5511	2.06488	6.74727	2.64764	2.59675
ART216-133-B-1-B-B	31.0844	2.59716	11.8455	11.5073	3.29415	88.6215	123.424	105.839	80.3105	26.459	2.04933	6.76332	2.65248	2.59675
ART216-149-B-1-B-B	32.0339	2.62268	11.9301	11.6049	3.33528	88.0529	121.375	107.532	81.8312	26.9847	2.05357	6.77755	2.66034	2.59675
ART216-173-B-1-B-B	32.0108	2.63969	11.9301	11.6049	3.33528	87.7686	121.375	107.548	81.7869	27.1206	2.05357	6.80431	2.66239	2.59675
ART216-187-B-1-B-B	28.4661	2.41682	11.2456	10.8384	3.14333	91.4646	127.521	101.425	76.5765	25.1052	2.02955	6.70034	2.6188	2.59675
ART216-212-B-1-B-B	33.553	2.68222	12.1019	11.7915	3.52723	85.4941	118.741	94.3846	72.7592	22.961	2.06347	6.40636	2.56058	2.56481
ART245-1-16-1-B-B	33.7775	2.71342	12.184	11.889	3.45867	84.3569	116.693	105.559	80.0501	26.5306	2.06488	6.7438	2.64751	2.59675
ART245-1-40-1-B-B	33.8005	2.71625	12.184	11.889	3.47238	84.3569	116.985	105.73	79.9616	26.5306	2.06488	6.73819	2.6471	2.59675
ART248-1-97-1-B-B	34.7039	2.72759	12.2711	11.9838	3.55465	84.3569	115.522	100.92	77.1884	25.1167	2.06912	6.58626	2.60919	2.58078
ART263-11-B-1-B-B	33.297	2.6879	12.0147	11.6996	3.41754	86.0628	118.449	104.486	79.183	26.218	2.06064	6.71856	2.63919	2.59675
ART314-14-B-1-B-B	32.4309	2.6567	11.9301	11.6049	3.3627	86.6314	120.497	105.622	80.1386	26.4901	2.0564	6.74151	2.64752	2.59675
ART350_10-2-1-B	24.5472	2.20529	10.4354	10.1668	2.95139	96.2978	132.497	100.641	72.9754	24.7511	1.99705	6.6225	2.61271	2.58078
ART350_2-4-3-B	29.7551	2.52911	11.6763	11.3121	3.2256	90.3274	126.643	97.8957	73.4519	23.9601	2.03803	6.61558	2.59367	2.59653
ART350_2-6-1-B	26.5268	2.35671	11.0764	10.6461	3.07478	92.8861	129.277	79.5371	55.6595	17.0158	2.01683	5.68027	2.42741	2.42106
ART387-2-1-1-1-0	30.9117	2.58015	11.7609	11.4097	3.28044	89.1901	123.717	105.352	79.8783	26.4323	2.04651	6.77072	2.64767	2.59653
ART387-9-1-1-1-B	29.7321	2.53478	11.6763	11.3121	3.2256	90.3274	126.643	97.7616	73.1941	23.9526	2.03803	6.61356	2.59429	2.59598
ART397-12-1-1-1-B	31.4929	2.61134	11.8865	11.5073	3.30786	88.3372	122.253	108.815	82.9586	27.4227	2.05075	6.81293	2.6715	2.59675
ART397-3-2-1-1-B	27.6259	2.38563	11.0764	10.6461	3.11591	92.3175	128.107	93.6798	69.1997	22.0534	2.02531	6.31612	2.54724	2.53287
ART430-16-1-1-1-5	32.4079	2.64536	11.9301	11.6049	3.3627	87.4843	120.497	105.532	79.9642	26.5849	2.0564	6.75243	2.64549	2.59675
ART478-13-8-1-1-B	26.7915	2.33459	10.9046	10.5514	3.07478	93.4548	129.57	106.163	80.8313	26.3472	2.01683	6.80762	2.65282	2.61273
ART478-8-1-1-1-B	25.3471	2.25576	10.6046	10.2644	3.00623	95.1606	131.034	88.1476	60.9584	20.5961	2.00552	6.14749	2.50803	2.50092
ART483-10-1-1-1-B	27.9309	2.3516	11.161	10.5026	3.17075	91.1803	127.814	116.769	90.3797	29.127	2.02107	7.06426	2.73231	2.64659
ART484-19-1-1-1-B	27.8503	2.38336	11.0764	10.8356	3.17075	92.0332	127.229	107.192	83.0003	26.4951	2.02107	6.76868	2.65767	2.61273
ART493-16-1-1-1-B	33.1445	2.66578	11.9301	11.602	3.52723	85.7785	119.034	96.7895	72.5874	22.677	2.07053	6.3014	2.57049	2.54884
ART58-46-1-1-B-B	26.9411	2.3533	10.9917	10.5485	3.08849	93.1704	128.692	85.2877	60.0887	18.5044	2.02107	5.88011	2.47989	2.453
ART58-5-1-1-B-B	31.234	2.61134	11.8455	11.5044	3.33528	88.0529	123.131	100.869	75.8839	24.9608	2.04792	6.66566	2.61584	2.59572
ART64-31-1-1-B-B	35.36	2.75595	12.3583	12.0785	3.66433	83.2197	114.937	96.0365	73.9779	23.4745	2.07618	6.41868	2.57174	2.56481
ART64-32-1-1-B-B	28.1381	2.43667	11.3302	10.9332	3.14333	91.4646	127.521	101.083	76.3187	24.9902	2.02955	6.67556	2.61811	2.59675
ART64-55-1-1-B-B	33.2308	2.6879	12.0147	11.6996	3.41754	86.0628	118.449	104.395	79.0112	26.2452	2.06064	6.72476	2.64007	2.59675
ART67-17-1-1-B-B	28.092	2.42589	11.3302	10.9332	3.14333	91.4646	127.521	101.194	76.2745	25.144	2.02955	6.69536	2.61878	2.59675
ART67-21-1-2-B-B	29.8874	2.54839	11.6763	11.3121	3.23931	90.0431	126.351	98.0441	73.4545	24.0598	2.03944	6.61226	2.59415	2.59525
ART68-12-1-1-B-B	25.3989	2.25576	10.6046	10.2644	3.01994	94.8763	131.034	87.5899	60.4351	20.0729	2.00552	6.08932	2.50955	2.48495
ART71-2-1-1-B-B	32.3101	2.67088	12.1019	11.6967	3.44496	86.9157	122.253	106.098	80.6594	26.1622	2.06912	6.80816	2.65882	2.64269
ART71-96-1-1-B-B	28.5927	2.48714	11.502	11.1226	3.17075	90.6117	127.229	99.8232	75.147	24.6859	2.03238	6.65797	2.60807	2.59569
ART73-69-1-2-B-B	29.03	2.50359	11.5891	11.2174	3.19817	90.6117	126.936	98.5805	73.9779	24.3289	2.0352	6.636	2.59772	2.59449
ART75-14-1-2-B-B	35.5038	2.8722	15.6067	13.2296	3.85628	81.2295	117.863	116.958	91.7676	29.3771	2.13413	7.10673	2.76716	2.75531
ART75-30-1-1-B-B	34.0537	2.71909	12.184	11.889	3.4861	83.7883	116.107	105.904	80.1386	26.5052	2.06488	6.72364	2.64977	2.59675
ART75-33-1-1-B-B	26.3311	2.34593	10.9917	10.5485	3.06107	93.1704	129.277	75.198	51.147	14.8597	2.01259	5.40468	2.39556	2.32523
ART75-56-1-2-B-B	24.3746	2.21209	10.4354	10.1668	2.95139	96.2978	132.497	100.477	72.6733	24.7595	1.99705	6.61643	2.61157	2.58078
ART75-57-1-1-B-B	26.3139	2.33402	10.8969	10.4509	3.06107	93.4548	129.277	73.2364	49.5847	14.1873	2.01259	5.25921	2.33231	2.30925
ART75-8-1-2-B-B	31.4757	2.61417	11.9301	11.6049	3.30786	88.3372	122.253	108.599	82.6983	27.3543	2.05075	6.80044	2.66985	2.59675
ART79-12-1-1-B-B	30.7851	2.57731	11.6763	11.3121	3.28044	89.1901	123.717	104.691	79.3575	26.209	2.04651	6.73294	2.64361	2.59556
ART84-35-1-1-B-B	33.5358	2.71115	12.1865	11.7455	3.55465	84.6412	118.741	104.642	79.4434	24.5549	2.08042	6.52102	2.60021	2.56481
ART85-48-1-1-B-B	28.069	2.44631	9.87902	10.3591	3.08849	89.7588	127.814	100.903	76.0584	22.1991	2.02531	6.41549	2.35452	2.54884
ART90-12-1-1-B-B	24.343	2.22287	10.52	10.2156	2.95139	96.0135	132.497	100.367	72.4988	24.7538	1.99422	6.61324	2.60935	2.57783
ART90-46-1-1-B-B	31.9993	2.66635	12.1019	11.6967	3.41754	86.9157	122.253	104.925	80.2272	25.8002	2.06205	6.78014	2.64705	2.62618
ART90-9-1-1-B-B	34.6522	2.84045	12.2275	11.7943	3.8837	80.3766	118.741	118.113	92.7232	29.6953	2.14119	7.19116	2.77724	2.8031
ART93-112-1-1-B-B	34.7672	2.81266	12.2711	11.8919	3.69175	81.7981	117.571	111.771	86.5624	28.1552	2.10586	6.96856	2.70716	2.69259
ART98-147-1-1-B-B	31.5735	2.62268	11.9301	11.6049	3.32157	87.7686	121.961	108.968	82.8311	27.5377	2.05216	6.81538	2.67382	2.59675
ART98-4-1-1-B-B	31.4354	2.61134	11.9301	11.6049	3.30786	88.3372	122.546	108.359	82.266	27.447	2.05075	6.80431	2.67024	2.59675
AgKE99-26	32.5748	2.63686	11.8455	11.5991	3.47238	86.6314	120.205	91.964	69.1138	22.3953	2.0564	6.34998	2.54536	2.54884
AgKE99-32	29.8673	2.53761	11.6763	11.3121	3.2256	90.3274	126.643	98.3204	73.7175	24.21	2.03803	6.63662	2.60119	2.59675
AgKE99-56	38.4559	3.00547	12.8685	12.5119	4.13049	76.6806	113.473	128.625	102.881	32.2742	2.2062	7.41272	2.97689	2.88425
Awarema	28.7711	2.49962	11.502	11.1226	3.18446	90.3274	127.229	100.076	75.4074	24.6883	2.03379	6.66055	2.61055	2.59543
BETIA	28.0258	2.43667	11.3302	10.9332	3.14333	91.1803	127.521	100.875	76.061	24.8913	2.02955	6.67569	2.61289	2.59675
BOUKE 189	31.8727	2.63118	11.9301	11.6049	3.33528	87.4843	121.961	106.741	80.8313	26.8457	2.05357	6.77438	2.65715	2.59675
CK3	29.4184	2.53478	11.6763	11.3121	3.2256	90.3274	126.643	96.8516	72.6707	23.7626	2.03803	6.59287	2.58674	2.59252
CRI-1-11-15-21	36.7295	2.85236	12.6557	12.2708	3.77402	81.5138	113.766	110.314	86.7369	27.2475	2.10021	6.85767	2.68247	2.64467
CRI-1-11-15-5	35.4676	2.79565	12.4019	12.0785	3.69175	82.6511	114.937	95.9501	73.931	23.5344	2.07618	6.43987	2.57438	2.56481
CRI-1-11-19-12	24.3171	2.20132	10.4354	10.1668	2.95139	96.2978	132.497	100.395	72.2385	24.7249	1.99281	6.61308	2.60712	2.57783
CRI-1-21-5-12	35.1069	2.91536	12.1772	11.7853	3.68084	83.2699	118.4	106.007	81.952	26.2553	2.27807	6.76505	2.6567	2.61856
CRI-AMANKWATIA	36.4688	2.84101	12.5711	12.222	3.76031	81.7981	114.059	100.48	78.7924	24.644	2.09314	6.57104	2.60958	2.59675
CRI-AgraRice	35.3657	2.8637	15.5631	13.1348	3.85628	81.2295	117.863	116.413	91.3327	29.3474	2.12565	7.10481	2.75328	2.739
CRI-Dartey	32.6582	2.66294	12.0147	11.6508	3.49981	86.0628	120.205	118.343	92.5488	29.6665	2.06912	7.13045	2.74184	2.67273
CRI-Emopa	37.1726	2.9119	12.8685	12.3684	3.82886	80.3766	113.473	120.776	94.7204	30.1473	2.11717	7.16416	2.76607	2.70856
CRI-Kantinka	37.2359	2.94593	13.0403	12.5579	3.85628	79.808	113.473	120.713	95.2412	30.3266	2.11575	7.16712	2.77255	2.70856
CRI-Mpuntuo	37.374	2.98279	13.3838	12.7502	3.8837	78.6708	113.473	121.987	95.4156	30.4708	2.12423	7.1863	2.78352	2.70856
CRI-Oboafo	36.7813	2.91757	12.8685	12.3684	3.80144	80.0923	113.473	118.92	93.1581	29.7271	2.10303	7.12934	2.74849	2.64467
DigJas-3	35.8664	2.81266	12.4839	12.0785	3.71917	82.3668	114.644	105.743	81.7869	26.2736	2.08608	6.73472	2.64784	2.59675
DigJas-61	35.3427	2.76445	12.3583	12.0785	3.67804	83.2197	114.937	95.629	73.8867	23.4007	2.07618	6.41816	2.56849	2.56481
DigJas-78	30.3305	2.57618	11.6763	11.3121	3.26673	89.1901	125.18	101.293	76.2302	24.9902	2.04368	6.66452	2.61811	2.59525
Digang	34.2272	2.73326	12.2275	11.889	3.54094	83.504	116.107	106.387	80.485	26.6716	2.06629	6.74739	2.65091	2.59675
Enapa	34.842	2.84385	12.3147	11.9866	3.77402	81.2295	118.156	117.137	90.6427	29.2714	2.185	7.01296	3.49057	2.96411
Ex-Baike (Asutware)	28.0057	2.42816	11.3302	10.9332	3.14333	91.4646	127.521	100.848	75.9282	24.8276	2.02672	6.67809	2.61453	2.59675
FKR 62N	35.5441	2.85519	12.4429	11.9838	3.80144	80.9452	116.693	118.189	92.4602	29.6456	2.11717	7.08537	2.75497	2.69259
GR18-SARI	26.8577	2.34423	10.9892	10.6002	3.08849	93.4548	128.985	98.0091	71.8036	23.9541	2.01542	6.56461	2.59267	2.58078
Gigante	30.9175	2.58015	11.8019	11.3609	3.3627	88.0529	123.131	106.655	81.438	26.4708	2.05075	6.82702	2.65984	2.61273
Gigante-SARI	37.0098	2.90907	12.8249	12.3684	3.82886	80.3766	114.059	120.063	93.6788	30.0123	2.1101	7.14821	2.76352	2.67662
HB3519-5	30.5952	2.56313	11.7583	11.3637	3.33528	88.3372	123.131	97.0102	73.9726	23.7074	2.04368	6.5224	2.58419	2.58078
HR32046F1-2-261	28.0575	2.45198	11.3327	10.9303	3.15704	92.0332	128.399	96.2138	70.1554	23.5264	2.02531	6.54072	2.58012	2.57924
HR32054F1-1-29-1	27.9683	2.4327	11.2481	10.8356	3.14333	91.4646	127.229	100.457	75.6235	24.888	2.02531	6.65708	2.6133	2.59354
HR32066F1-4-16-1	27.3094	2.40888	11.2456	10.8356	3.11591	92.3175	128.692	96.751	70.6761	23.6111	2.01824	6.53887	2.58216	2.57911
HR32066F1-4-19-1	27.9654	2.43837	11.3302	10.9332	3.14333	91.1803	127.521	100.594	75.7954	24.7576	2.02531	6.66044	2.61053	2.59675
HR32067F1-2-14-1	26.8318	2.32052	10.8174	10.3591	3.08849	93.4548	128.692	97.7636	72.1525	24.0491	2.01683	6.60641	2.59418	2.59336
HR32067F1-3-5-1	27.8216	2.43837	11.3302	10.9332	3.14333	91.1803	127.521	100.59	75.7094	24.7533	2.02531	6.65685	2.61001	2.59675
HR32068F1-3-10-1	26.78	2.37826	11.1174	10.6461	3.08849	92.6018	128.692	97.7117	70.6787	24.0775	2.01683	6.60878	2.59425	2.59296
HR32068F1-4-11-1	30.4456	2.5654	11.7583	11.3637	3.33528	88.3372	123.424	97.1447	73.8008	23.8844	2.04368	6.54084	2.58104	2.58078
HR32069F1-1-13-1	31.8152	2.62551	11.9276	11.5044	3.40932	87.2	121.961	100.039	76.3187	24.7173	2.05499	6.58534	2.60417	2.58078
HR32069F1-1-18-1	29.5882	2.5189	11.5891	11.2202	3.2256	90.0431	125.473	104.257	77.4462	26.0059	2.03661	6.71918	2.63978	2.59455
HR32069F1-1-3-1	31.3261	2.59943	11.8455	11.4125	3.37641	88.0529	122.839	96.2628	73.28	23.6378	2.04933	6.51742	2.57876	2.57868
HR32069F1-2-4-1	27.2749	2.40661	11.1635	10.6921	3.11591	92.3175	128.985	96.4503	69.5486	23.7317	2.01966	6.58916	2.58409	2.59013
HR32069F1-3-5-1	27.7928	2.41285	11.161	10.8356	3.14333	92.0332	127.814	97.592	69.9809	24.0264	2.02248	6.57075	2.58835	2.57857
HR32080-HB3567-4	35.7915	2.79054	12.4455	12.0354	3.71917	82.6511	114.351	89.638	70.1554	21.6815	2.08042	6.22325	2.52478	2.50092
HR32086-HB3569-37	30.7218	2.55519	11.7148	11.315	3.3627	88.3372	123.717	106.355	81.0917	26.4548	2.05075	6.81353	2.65327	2.61273
IDS 85	29.1278	2.52627	11.6763	11.1743	3.2256	90.6117	126.643	96.6565	69.5486	23.8562	2.03379	6.59675	2.58578	2.59013
IDSA85	33.3056	2.6964	12.1429	11.7455	3.54642	84.9255	119.034	93.8153	72.2385	22.8863	2.06488	6.3913	2.5575	2.54884
IR 84105-B-B-B-TGR4	36.039	2.94026	14.9658	12.8937	3.96596	78.6708	116.693	121.018	95.1552	30.548	2.13413	7.17302	2.78457	2.75648
JKE56-12	32.9546	2.67939	12.0993	11.7943	3.41754	85.4941	118.449	106.512	80.5735	26.7711	2.05781	6.75594	2.65331	2.59675
JKE56-3	33.8523	2.80982	12.2737	11.7943	3.71917	82.6511	119.912	116.001	89.5126	29.2011	2.17369	7.03563	2.74387	2.70856
JKE56-30	37.8862	2.90907	12.4429	12.0814	3.80144	80.3766	115.229	100.666	76.7536	24.8838	2.35458	6.55094	2.60853	2.56481
Japonica 1	29.9047	2.50756	11.4609	11.0279	3.30786	89.4744	124.302	95.3629	71.111	23.3074	2.03944	6.48594	2.57187	2.5626
Jasmine 85-CRI	28.5409	2.48771	11.502	11.0279	3.18446	90.6117	127.521	95.5881	69.5903	23.3118	2.02955	6.47338	2.57116	2.5626
Jasmine 85-SARI	29.7436	2.51493	11.5891	11.1226	3.30786	89.4744	124.887	103.408	76.0558	25.5589	2.04085	6.7564	2.63679	2.60831
KAF143	31.1477	2.61701	11.9301	11.6049	3.30786	88.3372	123.131	107.82	81.7869	27.0584	2.04651	6.77163	2.66571	2.59675
KAF53	29.3062	2.52684	11.6302	11.1226	3.2256	90.0431	126.058	97.4966	71.1526	23.9623	2.0352	6.50264	2.58578	2.5626
KBR 10	36.4015	2.84385	12.5711	12.0785	3.77402	81.7981	114.351	108.628	84.823	27.0902	2.09173	6.8237	2.67369	2.59675
KBR 12	36.6202	2.86937	13.2992	12.2708	3.86999	80.9452	114.644	102.135	80.399	25.1175	2.10021	6.58835	2.62918	2.59675
KBR 2	39.9578	3.26067	12.7019	12.1761	4.0208	77.5335	112.888	107.118	84.3049	25.8301	2.3673	6.66672	3.11088	2.90023
KBR V4	35.757	2.80699	12.4455	11.889	3.71917	82.6511	116.107	89.4115	69.8116	21.502	2.08042	6.18492	2.52337	2.50092
KE40	32.0339	2.65103	11.9301	11.6049	3.3627	87.4843	121.668	109.723	83.87	27.5621	2.05499	6.87846	2.68006	2.61273
KE53	32.7014	2.6879	12.0147	11.6996	3.40383	85.4941	119.912	109.718	83.7841	27.6697	2.05781	6.87679	2.67746	2.59833
Khao Hlanon(AfricaRice)	29.6198	2.52173	11.5045	10.9332	3.23931	90.0431	126.351	98.2847	73.0222	24.1506	2.03803	6.52368	2.58948	2.56481
N1	35.9642	2.824	12.5301	11.9838	3.74659	82.0825	115.522	98.7868	77.0114	24.0318	2.08325	6.47114	2.59527	2.54884
NERICA-L 19	36.9482	2.9119	12.8685	12.3684	3.81515	80.3766	114.059	119.553	92.8977	29.7986	2.10727	7.12561	2.75621	2.67662
NERICA-L 41	36.672	2.87788	12.7403	12.2708	3.80144	80.9452	114.351	101.222	78.7065	24.8044	2.09456	6.61816	2.61464	2.58078
ORYLUX 6	31.6253	2.63969	12.0173	11.4097	3.41754	87.4843	122.546	99.9485	76.1443	24.7236	2.05357	6.60428	2.60088	2.58078
Obolo	30.1809	2.54895	11.7148	11.2202	3.33528	88.9058	124.302	92.3079	67.8587	22.2421	2.04368	6.35663	2.54457	2.54663
Oreire	28.6214	2.49791	11.5891	11.0279	3.19817	90.6117	127.229	98.1941	73.28	24.1459	2.03096	6.51206	2.58709	2.56481
SA1-SARI	30.4399	2.58752	11.8455	11.4125	3.28044	88.9058	124.887	106.029	80.399	26.6458	2.04227	6.74919	2.65127	2.59675
SA10-SARI	25.6924	2.2688	10.6456	10.1668	3.03365	94.592	131.034	103.291	75.6235	25.5892	2.00694	6.75494	2.63536	2.60831
SA11-SARI	31.5677	2.63969	11.9301	11.6049	3.33528	87.4843	122.839	109.031	83.0029	27.3837	2.04933	6.81559	2.6723	2.59725
SA12-SARI	28.1496	2.48033	11.4199	10.8356	3.17075	91.1803	127.814	100.655	74.6679	24.9979	2.02672	6.65567	2.61401	2.59442
SA13-SARI	24.2825	2.19735	10.4354	10.1668	2.95139	96.2978	133.082	116.683	90.4656	29.2619	1.99281	7.0701	2.73093	2.63985
SA14-SARI	22.4411	1.73516	9.66366	8.63391	2.67718	98.8566	139.521	112.788	86.8202	28.533	1.94617	6.9913	2.70035	2.60201
SA15-SARI	32.9085	2.68506	12.0147	11.6996	3.41754	86.0628	119.034	109.92	83.8674	27.5794	2.05781	6.85826	2.67802	2.59756
SA17-SARI	25.2838	2.25916	10.6456	10.1668	3.01994	94.8763	131.619	102.209	74.6679	25.1871	2.00129	6.67765	2.62354	2.59422
SA18-SARI	31.7634	2.65103	11.9301	11.6049	3.34351	86.9157	121.961	109.799	83.7841	27.7519	2.05216	6.8512	2.67917	2.59709
SA19-SARI	32.5115	2.67088	12.0147	11.602	3.44496	85.7785	119.619	105.257	79.6153	26.3734	2.05499	6.73388	2.64048	2.59675
SA2-SARI	36.9942	2.94026	13.0403	12.5579	3.85628	79.808	114.059	103.177	80.399	25.348	2.10727	6.65871	2.63218	2.61273
SA20-SARI	27.1253	2.37145	11.0764	10.6461	3.11591	92.6018	128.985	90.4456	64.7731	21.6912	2.01966	6.25919	2.52919	2.53023
SA21-SARI	32.3216	2.66805	12.0173	11.5073	3.49981	86.0628	120.79	91.3686	68.7675	22.1223	2.05357	6.30111	2.54016	2.53009
SA22-SARI	34.3069	2.84839	12.2711	11.7943	3.8837	80.3766	119.034	116.819	90.1193	29.2814	2.11575	7.09883	2.75265	2.7216
SA24-SARI	27.085	2.38733	11.0764	10.5485	3.11591	92.6018	128.985	98.1227	71.025	24.2331	2.01683	6.60082	2.59504	2.59047
SA25-SARI	23.0827	1.84971	9.96619	9.20801	2.8417	97.7194	135.424	113.597	87.341	28.5463	1.96313	6.98396	2.70419	2.61012
SA26-SARI	27.0332	2.37939	11.0764	10.6461	3.11591	92.6018	128.985	90.3074	64.6872	21.4961	2.01966	6.23415	2.52438	2.52797
SA28-SARI	29.5249	2.50982	11.4609	11.025	3.30786	89.1901	124.887	94.6502	68.9419	23.119	2.03661	6.49103	2.56777	2.57071
SA29-SARI	30.0773	2.5688	11.6763	11.0279	3.26673	89.1901	125.765	100.766	75.798	24.8877	2.03944	6.66857	2.61278	2.59675
SA3-SARI	31.8842	2.64253	11.9301	11.6049	3.3627	87.4843	121.668	107.863	82.3936	26.9615	2.05216	6.82342	2.66385	2.59691
SA30-SARI	26.9123	2.38336	11.1174	10.6461	3.11591	92.3175	128.985	90.3376	64.5987	21.6072	2.01966	6.25295	2.52569	2.52775
SA31-SARI	35.3657	2.84782	12.1019	11.6996	3.69175	83.2197	120.205	108.894	83.1331	26.3861	2.33621	6.75702	2.86423	2.82036
SA33-SARI	27.8676	2.37372	11.0764	10.7409	3.19817	92.0332	127.521	107.183	82.917	26.5365	2.01824	6.75735	2.65748	2.59007
SA34-SARI	27.2691	2.43723	11.3302	10.9332	3.14333	91.4646	128.399	87.202	63.0389	20.4952	2.02531	6.07049	2.49642	2.50092
SA35-SARI	23.9632	2.19621	10.3918	10.1668	2.92396	96.2978	133.375	115.617	89.1637	28.9711	1.98715	7.04583	2.7206	2.62969
SA36-SARI	32.1547	2.66238	11.9301	11.6049	3.36681	86.6314	121.083	110.971	85.2136	27.9216	2.05499	6.86541	2.68868	2.59723
SA37-SARI	25.4565	2.2671	10.6456	10.1668	3.03365	94.592	131.034	102.848	75.1027	25.5037	2.00411	6.72519	2.63164	2.60108
SA38-SARI	38.6688	3.1274	13.853	13.4219	4.37728	73.8375	113.473	128.425	101.751	32.3188	2.19772	7.38553	2.84467	2.82036
SA39-SARI	28.4891	2.46559	11.4174	11.0308	3.19817	90.896	126.936	91.4988	67.1192	21.9066	2.03238	6.26667	2.53157	2.53287
SA4-SARI	34.5946	2.74461	12.3147	11.889	3.60949	83.504	116.107	100.617	76.5791	25.0266	2.06912	6.56653	2.60635	2.56481
SA41-SARI	23.6495	2.11625	10.3482	9.73618	2.89654	96.8664	133.96	114.616	88.2081	28.6285	1.98291	7.0149	2.70956	2.61926
SA50-SARI	24.225	2.2155	10.52	10.1668	2.95139	96.0135	133.375	116.415	89.8589	29.0223	1.99139	7.0474	2.72561	2.63575
SA51-SARI	36.9281	2.91474	12.8685	12.3684	3.82886	80.0923	114.059	102.917	79.7923	25.0406	2.10303	6.64135	2.62119	2.59675
SA52-SARI	22.6655	1.81285	9.57905	8.49039	2.62233	99.1409	139.228	113.332	87.0806	28.5177	1.94758	6.9648	2.70073	2.60494
SA53-SARI	29.991	2.57674	11.6763	11.0279	3.26673	89.1901	125.765	100.75	75.712	24.8619	2.03944	6.67473	2.61304	2.59675
SA54-SARI	34.2839	2.75878	12.2737	11.7943	3.60949	84.0726	117.571	96.51	74.582	23.5874	2.06912	6.40495	2.5727	2.53287
SA55-SARI	26.7973	2.37542	11.161	10.7409	3.11591	92.6018	128.985	89.7325	64.3409	21.4268	2.01966	6.21984	2.51853	2.52621
SA56-SARI	25.3817	2.29546	10.82	10.3562	3.03365	94.592	131.034	102.669	74.7564	25.2916	2.00411	6.70621	2.62696	2.5987
SA58-SARI	24.1387	2.22627	10.52	10.1668	2.95139	96.0135	133.375	116.301	89.5986	29.1002	1.99139	7.06461	2.72691	2.63519
SA59-SARI	23.9747	2.20302	10.4354	9.9773	2.93768	96.2978	133.668	115.772	89.1663	28.9534	1.98998	7.04678	2.72285	2.63515
SA60-SARI	25.7787	2.34134	10.9917	10.5485	3.06107	93.1704	130.156	95.5312	66.7729	23.4709	2.00835	6.5478	2.57486	2.55639
SA61-SARI	34.9888	2.80415	12.4403	12.0814	3.63691	82.3668	115.522	101.731	77.5348	25.2843	2.07477	6.62163	2.61316	2.58078
SA62-SARI	26.7253	2.38449	11.0764	10.6461	3.11591	92.3175	128.985	89.211	64.0831	21.2757	2.01966	6.19962	2.51786	2.51689
SA63-SARI	27.1828	2.431	11.3302	10.9332	3.14333	91.4646	128.399	86.1183	62.5182	20.2907	2.02248	6.033	2.48563	2.50092
SA64-SARI	35.5901	2.83534	12.5301	11.9838	3.74659	82.0825	115.522	90.2116	69.8064	21.6611	2.08184	6.22288	2.51984	2.51689
SA65-SARI	34.773	2.75595	12.3583	11.889	3.66433	83.2197	116.107	94.8203	72.6707	22.9899	2.07336	6.34392	2.55855	2.53287
SA66-SARI	33.7803	2.74461	12.1865	11.7943	3.52723	84.0726	118.449	105.187	81.0917	26.3219	2.06771	6.73155	2.64109	2.58078
SA68-SARI	25.7212	2.33799	10.9917	10.5485	3.06107	93.4548	130.156	95.2632	66.5099	23.252	2.00835	6.53749	2.57484	2.54884
SA69-SARI	32.7934	2.69073	12.0147	11.6996	3.41754	85.2098	119.034	109.336	83.6955	27.5801	2.05781	6.84224	2.6712	2.59675
SA7-SARI	28.3754	2.44559	11.2338	10.8615	3.18437	91.2487	126.503	105.297	78.2724	26.1509	2.01905	6.7761	2.64736	2.58718
SA8-SARI	30.7218	2.6085	11.8455	11.4125	3.30786	88.3372	124.009	104.829	79.4434	26.0728	2.04509	6.75404	2.64159	2.59675
SA9-SARI	33.5128	2.71342	12.184	11.8403	3.45867	84.3569	117.571	105.249	79.3575	26.4125	2.06205	6.74127	2.64286	2.59675
SAHEL 210	28.9782	2.51039	11.5891	11.0279	3.21189	90.6117	127.521	102.769	77.6207	25.413	2.03238	6.69552	2.62854	2.59675
SAHEL 134	36.6317	2.92041	12.8685	12.3684	3.80144	80.3766	114.351	92.1804	71.8895	22.3783	2.09314	6.341	2.54193	2.54884
SAHEL 177	27.1627	2.46105	11.4148	11.0279	3.14333	91.1803	128.399	85.8278	62.2578	20.3828	2.02107	6.03028	2.48682	2.50092
SR23364-128-1835-1-HV-1-1	24.225	2.22003	10.5636	9.97443	2.95139	95.4449	133.082	108.108	80.5735	26.7543	1.98857	6.85277	2.66488	2.59229
SR23364-128-1907-1-HV-1-1	27.829	2.42419	11.1584	10.6921	3.17075	90.896	126.936	105.76	78.5763	26.3024	2.01966	6.78118	2.64647	2.59675
SR23364-133-17-1-HV-1-2	24.3689	2.15141	10.6482	10.0261	2.89654	94.8763	135.716	100.733	72.9337	24.8013	1.9815	6.63788	2.61286	2.56481
SR23364-133-171-1-HV-1-1	32.195	2.66805	12.0147	11.6508	3.39012	86.3471	120.79	105.568	79.9642	26.303	2.05499	6.75889	2.64517	2.59675
SR3305F2-60-2-2-HV-1-1	24.7429	2.27391	10.7328	10.2615	3.00623	95.1606	132.204	109.493	82.1358	27.234	1.99563	6.88814	2.6744	2.61273
SR33705F2-60-1-1HV-1-1	32.874	2.6879	12.0583	11.602	3.54642	85.2098	119.619	88.6517	67.2911	21.1012	2.06205	6.13645	2.50903	2.51689
SR33705F2-60-1-2-HV-1-2	29.1278	2.40321	11.161	10.3591	3.14333	90.3274	128.985	112.913	86.4739	27.9781	2.02248	6.92548	2.69988	2.6287
SR33705F2-61-1-3-HV-1-1	22.6742	1.87807	9.92261	8.92096	2.74573	98.0037	138.643	113.132	86.953	28.3808	1.95324	6.95266	2.69777	2.60375
SR33705F2-61-3-2-HV-1-1	26.4347	2.30283	10.9482	10.2615	3.06107	93.1704	129.863	113.277	86.953	28.4302	2.00411	6.978	2.70015	2.6063
SR33705F2-67-1-1-HV-1-1	28.8286	2.41001	11.3738	10.6949	3.19817	90.896	126.643	108.506	82.654	27.0475	2.02531	6.85425	2.6672	2.60122
SR34034F3-71-2-1-1-3	26.4376	2.355	11.0738	10.5485	3.07478	92.8861	130.156	100.742	75.6235	24.7069	2.00835	6.57659	2.6069	2.56869
SR34042F3-22-1-1-1-3	30.1406	2.58298	11.7609	11.2202	3.28044	89.1901	125.765	101.061	75.9698	24.7873	2.04227	6.65874	2.61401	2.59675
SR34042F3-22-1-1-5-3	34.6349	2.79791	12.1891	11.6967	3.80144	81.7981	118.449	107.441	81.7426	26.0407	2.31925	6.72881	2.83329	2.80439
SR34053(#5-52)-1-4-2-10-1-2	37.8286	2.98279	12.7865	12.2708	4.04823	77.5335	113.473	105.607	83.5237	25.6878	2.20761	6.66046	2.80263	2.80439
SR34053(#5-52)-1-4-2-10-3-1	34.3357	2.74461	12.3147	11.8403	3.60949	83.504	116.4	100.314	76.2328	24.8427	2.06912	6.55142	2.60152	2.56481
SR34053(#5-52)-1-4-2-10-3-3	31.7519	2.65387	11.9301	11.6049	3.3627	87.2	121.961	107.18	81.7843	26.7965	2.05216	6.79469	2.65935	2.59675
SR34590-HB 3433-5-1-1	27.0792	2.40718	11.2481	10.5485	3.11591	92.6018	129.863	106.773	81.0917	26.6654	2.014	6.8207	2.6565	2.60034
SR34590-HB 3433-8-3-1	32.592	2.67939	12.0147	11.6049	3.41754	85.7785	119.912	108.845	83.0446	27.4493	2.05781	6.8259	2.67071	2.59675
SR34590-HB-3433-7-1-1	35.8088	2.91757	13.4249	12.5119	3.96596	79.5237	117.278	117.211	91.8145	29.4662	2.11575	7.08724	2.75249	2.72453
SR34590-HB3433-1-1-1	30.7506	2.59716	11.843	11.269	3.33528	87.2	122.253	101.744	74.9309	25.233	2.04368	6.63942	2.61755	2.58078
SR34590-HB3433-1-3-1	25.7068	2.24952	10.82	9.97443	3.04736	93.7391	130.741	94.8006	70.4183	22.8525	2.00129	6.29749	2.55542	2.53419
SR34590-HB3433-1-3-1-1	26.9814	2.20585	10.9046	10.0692	3.14333	92.6018	128.985	104.946	80.8313	25.8394	1.99987	6.67241	2.63317	2.56836
SR34590-HB3433-2-1-1	30.1003	2.58582	11.7609	11.2202	3.28044	89.1901	125.765	101.041	75.9698	24.8805	2.04227	6.66953	2.61348	2.59675
SR34590-HB3433-3-1-1	31.07	2.61984	11.8455	11.315	3.33528	87.7686	123.424	108.015	82.3962	27.1186	2.04792	6.80889	2.66325	2.59675
SR34590-HB3433-5-1-1	33.7314	2.76162	12.4429	11.9838	3.6232	83.7883	119.034	104.612	80.6594	25.7318	2.08042	6.67631	2.64471	2.61273
SR34590-HB3433-6-1-1	26.6074	2.38222	11.161	10.5973	3.11591	92.6018	129.57	88.6956	63.3019	21.1477	2.01542	6.15229	2.51177	2.51689
SR34590-HB3433-6-2-1	28.2244	2.51663	11.5455	11.0279	3.18446	90.3274	128.107	96.7469	72.1525	23.6217	2.02814	6.45933	2.5779	2.56481
SR34590-HB3433-7-2-1	33.3747	2.71342	12.2301	11.7455	3.55465	84.9255	119.034	98.42	74.5846	24.0069	2.06347	6.4975	2.58719	2.56481
SR34590-HB3433-7-3-1	31.1246	2.64253	11.9737	11.4097	3.33528	87.2	123.717	103.517	78.0555	25.6587	2.04933	6.72199	2.63005	2.59675
SR34590-HB3433-8-2-1	29.4673	2.53534	11.6737	11.0738	3.25302	89.7588	126.351	94.9019	70.4157	22.9347	2.03803	6.41074	2.56443	2.56481
SR34598-HB-16-HV-1-1	27.1253	2.431	11.3302	10.8844	3.14333	91.7489	129.277	85.2738	61.7344	20.0967	2.02107	5.95063	2.48267	2.50092
SR34796-1-4-6-3-2-1	36.0505	2.86937	12.7839	12.2737	3.77402	81.2295	114.937	90.8933	70.5043	21.8943	2.08608	6.27005	2.52619	2.53287
SR35230-2-9-2-2	32.0626	2.72476	12.1019	11.5073	3.58207	84.6412	122.839	110.447	85.1746	27.6803	2.07194	6.90504	2.69278	2.66064
SR35250-1-15-1-1	31.608	2.64536	11.9301	11.3121	3.3627	87.4843	122.546	106.995	81.2219	26.7611	2.05075	6.78531	2.65721	2.59675
SR35250-1-23-2-1	25.3356	2.3068	10.82	10.3562	3.04736	94.0234	131.326	94.4561	65.5569	23.011	2.0027	6.45017	2.5635	2.54884
SR35250-2-3-1-1	23.3446	2.16332	10.3918	9.54386	2.89654	96.5821	134.546	113.801	87.5128	28.5517	1.97443	7.0026	2.70449	2.60572
SR35250-2-4-2-3	29.9306	2.5603	11.6737	11.1226	3.26673	89.1901	125.765	100.631	75.5376	24.8109	2.03803	6.66919	2.61164	2.59675
SR35266-2-11-1-1	28.2071	2.47183	11.3327	10.7868	3.19817	90.3274	127.229	96.864	70.5902	23.6347	2.02672	6.41021	2.57643	2.54884
SR35266-2-11-1-1-1	30.3881	2.54612	11.5866	10.8872	3.33528	88.0529	122.839	108.587	82.4821	27.2165	2.0352	6.82563	2.66474	2.59938
SR35266-2-11-4-1	30.319	2.58128	11.7609	11.2174	3.3627	87.7686	124.009	94.3308	69.5486	22.8772	2.03944	6.415	2.56014	2.54884
SR35266-2-11-4-1-1	35.4808	2.83251	12.6147	12.0814	3.74659	81.7981	115.522	97.4703	75.3657	23.688	2.0776	6.433	2.57529	2.54884
SR35266-2-12-1-1	25.8535	2.32268	11.0328	10.4538	3.06107	93.1704	131.034	94.6655	69.809	22.8019	2.00411	6.28997	2.55291	2.53538
SR35266-2-12-2-1	23.9315	2.22627	10.5636	9.73618	2.95139	95.4449	133.668	107.28	80.0501	26.8683	1.9815	6.83898	2.65883	2.58569
SR35266-2-12-4-1	33.7989	2.81178	12.3004	11.682	3.75607	82.6562	121.672	113.079	88.6767	28.1176	2.2225	6.9973	2.81267	2.75995
SR35266-2-16-1-1	25.6822	2.32578	10.8019	10.243	3.04144	94.164	131.334	112.423	86.1418	28.0984	1.98828	6.97199	2.71502	2.64117
SR35266-2-16-2-1	28.0546	2.45652	11.3327	10.8356	3.19817	90.6117	126.643	98.1981	70.1554	24.1424	2.0239	6.55459	2.59287	2.56481
SR35266-2-17-1-1	26.5556	2.37542	11.0764	10.5485	3.11591	92.6018	129.863	88.4535	62.5156	20.9462	2.01542	6.10573	2.50919	2.51689
SR35266-2-17-2-1	35.1068	2.81833	12.4839	11.9866	3.66433	81.7981	115.815	111.747	85.0001	27.8036	2.08466	6.88584	2.68972	2.6287
SR35266-2-18-1-1	26.0607	2.33856	10.9892	10.4538	3.07478	93.7391	130.741	104.262	77.4462	25.7931	2.00835	6.72731	2.63367	2.59675
SR35266-2-18-2-1	29.3205	2.51669	11.5251	10.9617	3.31225	89.254	125.257	91.8662	66.3565	22.1154	2.02897	6.26177	2.51336	2.52049
SR35266-2-18-3-1	24.7602	2.28355	10.6918	9.97443	3.00623	94.592	132.497	104.88	79.0945	25.6913	1.99422	6.64932	2.63405	2.5672
SR35266-2-19-1-1	26.1297	2.39413	11.1584	10.7409	3.08849	92.6018	130.448	95.2745	70.158	22.5709	2.01118	6.2703	2.55802	2.51689
SR35266-2-20-1-1	27.5626	2.45822	11.3302	10.8356	3.15704	90.896	128.692	90.4996	65.9475	21.3044	2.0239	6.15831	2.52369	2.50092
SR35266-2-20-3-1	25.4478	2.31757	10.9046	10.3562	3.04736	93.7391	131.034	97.1437	70.8506	23.0596	2.00411	6.40471	2.5752	2.54884
SR35266-2-20-3-1-1	29.0703	2.52457	11.5866	11.0279	3.25302	88.9058	125.473	91.3305	66.5984	21.6236	2.0352	6.15901	2.52852	2.50092
SR35266-2-4-4-1	33.9645	2.79678	12.3121	11.889	3.74659	82.3668	119.034	100.629	77.0999	24.5457	2.08325	6.51257	2.60998	2.59675
SR35266-3-1-3-1	27.6115	2.41058	11.161	10.6433	3.17075	91.7489	127.814	99.8739	71.8895	24.6766	2.02107	6.5953	2.6061	2.56481
SR35266-3-1-5-1	31.1592	2.58695	11.8019	11.315	3.44496	87.4843	121.961	110.135	83.9585	27.6829	2.04368	6.86564	2.67689	2.61273
SR35266-3-2-3-1	30.1982	2.56256	11.6712	11.1255	3.30786	87.7686	123.131	108.557	82.6566	27.1279	2.03803	6.81269	2.66463	2.60977
SR35266-3-2-4-1	30.014	2.57731	11.7609	11.1226	3.28044	89.4744	126.351	100.617	75.5402	24.6683	2.03944	6.65721	2.60709	2.59675
SR35266-3-3-5-1	31.5275	2.63969	11.8455	11.2174	3.3627	87.4843	122.839	106.779	81.0917	26.7279	2.05075	6.78331	2.65527	2.59675
SR35276-2-4-3-1-1	34.1688	2.84101	13.2967	12.3656	3.71917	81.7981	118.741	110.454	85.086	27.1573	2.0988	6.76041	2.69554	2.64467
SR35276-2-4-3-2	27.5367	2.47523	11.502	11.0279	3.17075	90.896	128.692	90.2497	65.8173	21.2545	2.02248	6.15537	2.52118	2.50092
SR35276-2-4-3-3	32.3791	2.69073	12.0147	11.4097	3.40383	85.4941	120.497	108.288	82.5655	27.4786	2.0564	6.82334	2.66708	2.59675
SR35278-1-7-2-2	22.9274	2.11739	10.3482	9.16208	2.89654	96.8664	135.424	113.367	86.9973	28.3902	1.96878	6.97065	2.70032	2.60248
SR35278-1-7-3-2	31.9245	2.67655	12.0583	11.5073	3.39012	85.7785	121.668	104.861	79.2715	26.1543	2.05216	6.7358	2.64091	2.59675
SR35278-1-9-2-1	31.7461	2.62268	11.8865	11.4097	3.44496	86.6314	121.375	96.9729	72.0666	23.8274	2.05075	6.49965	2.58124	2.56481
SR35278-1-9-3-1	26.3542	2.38846	11.161	10.4509	3.11591	92.3175	130.156	87.3266	61.4766	20.4399	2.01259	6.06588	2.50277	2.48495
SR35278-1-9-3-3	30.0025	2.58582	11.7609	11.1226	3.28044	89.1901	126.351	100.478	75.5402	24.4949	2.03944	6.64044	2.60757	2.59675
SR35278-2-10-1-2	23.6783	2.19735	10.4354	9.4032	2.95139	96.2978	134.253	115.061	88.6013	28.7437	1.98291	6.99885	2.7112	2.62399
SR35278-2-10-1-3	25.4104	2.3051	10.9046	9.78498	3.03365	94.0234	132.204	108.608	82.7868	27.0169	1.99139	6.82767	2.66521	2.599
SR35285-2-8-4-1	30.4168	2.6136	11.9301	11.3121	3.30786	88.3372	125.765	99.4722	74.2773	24.2461	2.04227	6.6345	2.59776	2.59675
SR35300-1-HV-1-2	28.7711	2.51096	11.5891	11.0279	3.21189	90.6117	127.521	102.244	77.2301	25.2394	2.03238	6.6915	2.62063	2.59675
SR35311-HB3497-4	24.1617	2.26483	10.7328	9.64146	2.97881	94.8763	133.375	103.192	77.7066	25.2533	1.98291	6.57682	2.61692	2.55042
SR35311-HB3497-87	26.2966	2.37315	11.0764	10.4509	3.1022	92.6018	130.156	86.3437	60.6954	19.8052	2.01259	6.02252	2.49218	2.48495
SR35311-HB3497-88	29.8702	2.58298	11.7609	11.1226	3.28044	89.1901	126.351	100.371	75.2746	24.6268	2.03944	6.65969	2.6064	2.59675
SR35329-HB3509-91	33.9904	2.7361	12.2275	11.6996	3.55465	83.504	116.693	106.249	80.3105	26.6514	2.06629	6.7439	2.64685	2.59675
TV1	34.3932	2.80699	12.5275	11.9838	3.63691	82.9354	118.156	94.0577	72.1499	22.8799	2.07336	6.39907	2.55438	2.56481
TV2	32.3388	2.68506	12.0147	11.4097	3.40383	86.0628	120.497	108.116	82.1332	27.1327	2.0564	6.78271	2.66224	2.59675
Tog7291	36.3526	2.91474	12.9557	12.4631	3.82886	80.3766	114.644	107.377	82.6566	26.4872	2.0988	6.74938	2.65797	2.61273
Togo Marshall	36.8446	2.92324	13.0403	12.5579	3.85628	80.0923	114.059	102.001	79.0945	24.8503	2.10445	6.57678	2.6141	2.59675
Toxx3377	33.8868	2.76162	12.2737	11.6967	3.60949	83.7883	117.863	108.155	82.2191	27.2159	2.06629	6.79145	2.66597	2.59675
UPL 30	24.8177	2.28695	10.7225	10.2615	3.03365	94.3077	132.497	101.46	73.3685	24.9364	1.99987	6.63742	2.61691	2.57783
UPL 32	28.1783	2.48204	11.5045	10.8356	3.19817	90.896	128.107	96.0823	71.0224	23.1359	2.02672	6.41528	2.56925	2.54884
UPL 39	29.1393	2.52117	12.0993	11.1226	3.39012	88.9058	126.351	111.319	84.2189	27.782	2.04509	6.89259	2.69682	2.64172
UPL 44	29.8184	2.58015	11.8455	11.2174	3.28044	88.9058	126.351	100.326	75.1027	24.5786	2.03803	6.64665	2.60585	2.59675
UPL 6	27.4072	2.43837	11.2481	10.6433	3.15704	91.4646	128.985	91.5322	65.208	21.521	2.02107	6.27399	2.53636	2.53287
UPL 87	26.7973	2.42533	11.3302	10.7868	3.14333	91.4646	129.277	82.5124	58.1801	18.4847	2.01683	5.8349	2.45532	2.453
Viwornor short	34.6752	2.7758	12.4455	11.889	3.71917	82.9354	116.107	107.313	81.2635	27.0471	2.07194	6.78121	2.65737	2.59675
WAB 2085-TGR2-WAT4-1-1	22.3433	1.71984	9.66366	8.34686	2.64975	99.1409	140.399	112.521	86.388	28.1813	1.9391	6.90072	2.68652	2.59675
WAB 2099-WAC1.FKR3-1-TGR1-2	30.2528	2.6085	11.9301	11.3121	3.30786	88.3372	125.765	99.1653	73.9752	24.2665	2.04227	6.63049	2.59672	2.59675
WAB 2101-WAC4-1-TGR1-WAT3-5-TGR2	26.7973	2.45084	11.3738	10.8815	3.14333	90.896	129.277	81.9137	57.9171	18.3734	2.01683	5.84941	2.45105	2.453
WAB 2135-WAC B-2-TGR3-WAT8-3	25.163	2.32098	10.82	10.3562	3.06107	93.4548	131.912	93.6747	65.1246	22.8145	2.00411	6.43101	2.56493	2.54884
WAB 2138-WAC B-2-TGR2-WAT5-1	26.2276	2.39413	11.161	10.4509	3.11591	92.0332	130.156	85.3789	60.0002	19.4016	2.01118	5.98794	2.48376	2.48495
WAIQ1-SARI	21.4341	1.96313	7.99713	7.91916	2.59491	98.5723	141.57	116.181	88.3825	27.3742	1.94617	6.74754	3.02519	2.90023

## Sheet: Table S4
Table S4A: Pearson's correlation coefficients among measured traits
	GY	GW	TN	PN	HGW	HD	MD	PH	CL	PL	GT	GL	SLEMMAL	GLWR
GY	1	0.963695	0.850053	0.925004	0.963265	-0.979573	-0.980471	0.422948	0.494587	0.421968	0.737068	0.388336	0.391688	0.449676
GW	0.963695	1	0.858881	0.941137	0.952067	-0.967329	-0.941704	0.39479	0.457082	0.387742	0.768666	0.35849	0.400421	0.466981
TN	0.850053	0.858881	1	0.932258	0.862644	-0.863444	-0.839148	0.396394	0.453313	0.406812	0.580736	0.375429	0.355605	0.414425
PN	0.925004	0.941137	0.932258	1	0.906749	-0.922019	-0.92919	0.357064	0.418566	0.363268	0.622286	0.335428	0.323919	0.386304
HGW	0.963265	0.952067	0.862644	0.906749	1	-0.982598	-0.93799	0.454289	0.520078	0.440854	0.777514	0.406605	0.450544	0.525011
HD	-0.979573	-0.967329	-0.863444	-0.922019	-0.982598	1	0.957487	-0.444375	-0.51258	-0.433633	-0.750903	-0.397241	-0.423912	-0.494569
MD	-0.980471	-0.941704	-0.839148	-0.92919	-0.93799	0.957487	1	-0.370159	-0.440689	-0.374201	-0.649397	-0.335603	-0.323912	-0.366979
PH	0.422948	0.39479	0.396394	0.357064	0.454289	-0.444375	-0.370159	1	0.985493	0.987759	0.41647	0.968674	0.790226	0.803833
CL	0.494587	0.457082	0.453313	0.418566	0.520078	-0.51258	-0.440689	0.985493	1	0.973977	0.451438	0.948725	0.77747	0.797516
PL	0.421968	0.387742	0.406812	0.363268	0.440854	-0.433633	-0.374201	0.987759	0.973977	1	0.381561	0.985384	0.766709	0.77367
GT	0.737068	0.768666	0.580736	0.622286	0.777514	-0.750903	-0.649397	0.41647	0.451438	0.381561	1	0.358322	0.551678	0.628231
GL	0.388336	0.35849	0.375429	0.335428	0.406605	-0.397241	-0.335603	0.968674	0.948725	0.985384	0.358322	1	0.738111	0.773687
SLEMMAL	0.391688	0.400421	0.355605	0.323919	0.450544	-0.423912	-0.323912	0.790226	0.77747	0.766709	0.551678	0.738111	1	0.929088
GLWR	0.449676	0.466981	0.414425	0.386304	0.525011	-0.494569	-0.366979	0.803833	0.797516	0.77367	0.628231	0.773687	0.929088	1
Table S4B: Genotypic correlation coefficients among measured traits
Trait	GY	GW	TN	PN	HGW	HD	MD	PH	CL	PL	GT	GL	SLEMMAL	GLWR
GY	1	0.976193	0.959315	0.971129	0.976032	-0.991277	-0.992557	0.254955	0.377966	0.263117	0.99	0.228579	0.325776	0.431143
GW	0.976193	1	0.976961	0.988615	0.971363	-0.980495	-0.972747	0.179027	0.291716	0.190009	0.984664	0.165045	0.238586	0.374964
TN	0.959315	0.976961	1	0.978845	0.971522	-0.966479	-0.940859	0.217852	0.327237	0.229593	0.99	0.210803	0.201876	0.353643
PN	0.971129	0.988615	0.978845	1	0.959401	-0.963379	-0.967896	0.159304	0.267057	0.175586	0.99	0.158871	0.167354	0.317878
HGW	0.976032	0.971363	0.971522	0.959401	1	-0.992273	-0.966153	0.254387	0.375215	0.254076	0.997842	0.221733	0.312376	0.444347
HD	-0.991277	-0.980495	-0.966479	-0.963379	-0.992273	1	0.983114	-0.268478	-0.383861	-0.273024	-0.99	-0.233361	-0.334716	-0.447876
MD	-0.992557	-0.972747	-0.940859	-0.967896	-0.966153	0.983114	1	-0.219319	-0.336825	-0.23231	-0.99	-0.191112	-0.268886	-0.360185
PH	0.254955	0.179027	0.217852	0.159304	0.254387	-0.268478	-0.219319	1	0.986869	0.991644	0.206155	0.975596	0.981717	0.902483
CL	0.377966	0.291716	0.327237	0.267057	0.375215	-0.383861	-0.336825	0.986869	1	0.977928	0.334549	0.958688	0.990413	0.923938
PL	0.263117	0.190009	0.229593	0.175586	0.254076	-0.273024	-0.23231	0.991644	0.977928	1	0.211547	0.990279	0.975132	0.90646
GT	0.99	0.984664	0.99	0.99	0.997842	-0.99	-0.99	0.206155	0.334549	0.211547	1	0.18036	0.298656	0.439864
GL	0.228579	0.165045	0.210803	0.158871	0.221733	-0.233361	-0.191112	0.975596	0.958688	0.990279	0.18036	1	0.967587	0.922223
SLEMMAL	0.325776	0.238586	0.201876	0.167354	0.312376	-0.334716	-0.268886	0.981717	0.990413	0.975132	0.298656	0.967587	1	0.940181
GLWR	0.431143	0.374964	0.353643	0.317878	0.444347	-0.447876	-0.360185	0.902483	0.923938	0.90646	0.439864	0.922223	0.940181	1

## Sheet: Table S5
Table S5: Cos2 values of variables for the first three PCs, the first two of which were significant.
Trait	PC1	PC2	PC3
GY	0.83	0.14	0
GW	0.79	0.18	0
TN	0.73	0.15	0.02
PN	0.74	0.21	0.01
HGW	0.84	0.13	0
HD	0.85	0.13	0
MD	0.77	0.18	0.01
PH	0.4	0.57	0.02
CL	0.49	0.46	0.03
PL	0.4	0.56	0.04
GT	0.68	0.06	0.18
GL	0.36	0.58	0.04
SLEMMAL	0.39	0.42	0.13
GLWR	0.49	0.34	0.12

## Sheet: Table S6
Table S6: Cos2 values of individual rice genotypes for the first three PCs, the first two of which were significant.
Rice genotype	PC1	PC2	PC3
228	0.0841368	0.882517	0.000418918
644 Gold	0.243405	0.500628	0.0284347
80 DAYS-SARI	0.771935	0.0350131	0.0689396
AFRICARICE 4	0.664805	0.308537	0.00119628
AFRICARICE 6	0.0714776	0.889464	0.000931416
AgKE99-26	0.0115633	0.9581	0.000792203
AgKE99-32	0.538952	0.0497855	0.00698728
AgKE99-56	0.856567	0.109287	0.0288279
AGRA-CRI-LOL-1-11	0.90981	0.0821997	0.00254721
AGRA-CRI-LOL-1-21	0.700532	0.272559	0.00252695
AGRA-CRI-LOL-1-7	0.940206	0.0523929	0.00396864
AGRA-CRI-LOL-2-27	0.647441	0.317488	0.00337699
AGRA-CRI-LOL-2-29	0.656738	0.315715	0.00419145
AGRA-CRI-LOL-2-7	0.945178	0.0471985	0.00552431
AGRA-SARI	0.902618	0.0840362	0.00471072
ARICA 2	0.663938	0.307307	0.00565996
ARICA 3	0.642776	0.339209	0.00841483
ART1005-21-1-1-1-B	0.548077	0.0706045	0.0102874
ART100-56-1-1-B-B	0.656198	0.130065	0.11447
ART100-57-1-2-B-B	0.800499	0.0403296	0.0674475
ART101-99-1-2-B-B	0.855699	0.0286294	4.631e-06
ART105-3-1-2-B-B	0.917421	0.0654487	0.00836629
ART108-2-1-1-B-B	0.910685	0.0714744	0.0123135
ART112-74-1-1-B-B	0.927762	0.00235024	0.0180193
ART112-85-1-1-B-B	0.321961	0.672076	0.00151405
ART120-26-1-1-B-B	0.916467	0.0684752	0.0115507
ART125-26-1-1-B-B	0.709506	0.274074	0.0074717
ART132-35-1-1-B-B	0.00190801	0.907123	0.038661
ART143-150-B-1-B-B	0.685925	0.29165	0.00965525
ART152-3-1-1-B-B	0.58044	0.35095	0.0248228
ART174-2-1-1-B-B	0.825824	0.0412799	0.0643511
ART216-133-B-1-B-B	0.401388	0.269024	0.140094
ART216-149-B-1-B-B	0.628511	0.127463	0.12706
ART216-173-B-1-B-B	0.633994	0.132629	0.1332
ART216-187-B-1-B-B	0.684425	0.266077	0.000379581
ART216-212-B-1-B-B	0.0560776	0.910832	0.0009942
ART245-1-16-1-B-B	0.824644	0.0426435	0.0638071
ART245-1-40-1-B-B	0.836334	0.0447628	0.059768
ART248-1-97-1-B-B	0.544033	0.36997	0.0326372
ART263-11-B-1-B-B	0.794521	0.0454025	0.0650968
ART314-14-B-1-B-B	0.808509	0.00102961	0.0945662
ART350:10-2-1-B	0.806902	0.178072	0.00504986
ART350:2-4-3-B	0.559131	0.0783285	0.00863639
ART350:2-6-1-B	0.6172	0.366781	0.00792642
ART387-2-1-1-1-0	0.213517	0.425846	0.155155
ART387-9-1-1-1-B	0.553844	0.0931947	0.0109287
ART397-12-1-1-1-B	0.456986	0.314624	0.125705
ART397-3-2-1-1-B	0.896581	0.0884929	0.010224
ART430-16-1-1-1-5	0.762258	0.00867407	0.111621
ART478-13-8-1-1-B	0.359173	0.628639	2.69321e-05
ART478-8-1-1-1-B	0.912207	0.0705364	0.0134556
ART483-10-1-1-1-B	0.000530497	0.976808	0.0123774
ART484-19-1-1-1-B	0.187464	0.765805	0.00604551
ART493-16-1-1-1-B	0.0179297	0.924014	0.00164125
ART58-46-1-1-B-B	0.69007	0.286682	0.0112788
ART58-5-1-1-B-B	0.149389	0.385582	0.0478282
ART64-31-1-1-B-B	0.262205	0.697428	0.00548808
ART64-32-1-1-B-B	0.745269	0.19025	0.00195156
ART64-55-1-1-B-B	0.793359	0.0455623	0.0650545
ART67-17-1-1-B-B	0.690965	0.23979	9.91711e-05
ART67-21-1-2-B-B	0.520753	0.115826	0.0088722
ART68-12-1-1-B-B	0.884554	0.0970039	0.0144524
ART71-2-1-1-B-B	0.89629	0.0297163	9.29035e-05
ART71-96-1-1-B-B	0.767343	0.045729	0.000677195
ART73-69-1-2-B-B	0.729845	0.00172395	0.0026561
ART75-14-1-2-B-B	0.80878	0.00355906	0.00277241
ART75-30-1-1-B-B	0.815155	0.0579881	0.052734
ART75-33-1-1-B-B	0.565376	0.407213	0.00300014
ART75-56-1-2-B-B	0.812291	0.171667	0.00541296
ART75-57-1-1-B-B	0.554956	0.421594	0.00162081
ART75-8-1-2-B-B	0.489588	0.254932	0.128813
ART79-12-1-1-B-B	0.127988	0.495952	0.134157
ART84-35-1-1-B-B	0.492726	0.387035	0.0254755
ART85-48-1-1-B-B	0.548111	0.0196484	0.0198575
ART90-12-1-1-B-B	0.828035	0.15894	0.00321469
ART90-46-1-1-B-B	0.893929	0.00327631	0.00976268
ART90-9-1-1-B-B	0.808772	0.121262	0.0241577
ART93-112-1-1-B-B	0.951736	0.026934	0.000586372
ART98-147-1-1-B-B	0.539379	0.236747	0.123853
ART98-4-1-1-B-B	0.47184	0.270862	0.129078
Awarema	0.761614	0.0474495	0.00145493
BETIA	0.753116	0.176239	0.00125312
BOUKE 189	0.672687	0.0988166	0.124848
CK3	0.568635	0.134298	0.00967416
CRI-1-11-15-21	0.967552	0.00980519	0.010674
CRI-1-11-15-5	0.296773	0.66837	0.00683288
CRI-1-11-19-12	0.827974	0.157699	0.00336114
CRI-1-21-5-12	0.649041	0.0548379	0.0747934
CRI-AgraRice	0.803991	0.00230539	0.00664695
CRI-AMANKWATIA	0.628082	0.345731	0.00459817
CRI-Dartey	0.613992	0.357265	0.022446
CRI-Emopa	0.94437	0.0457847	0.00660536
CRI-Kantinka	0.953884	0.0361924	0.00838157
CRI-Mpuntuo	0.961222	0.0267702	0.00873336
CRI-Oboafo	0.93854	0.0215542	0.0294328
Digang	0.848966	0.0431854	0.0569432
DigJas-3	0.847549	0.104258	0.0249152
DigJas-61	0.257872	0.702847	0.00533843
DigJas-78	0.292053	0.0049861	0.00529243
Enapa	0.439053	0.164696	0.270233
Ex-Baike (Asutware)	0.758525	0.171544	0.00047811
FKR 62N	0.920632	0.0650556	0.000824738
Gigante	0.496327	0.424848	0.056498
Gigante-SARI	0.943453	0.0374666	0.0140542
GR18-SARI	0.940425	0.028386	0.0102131
HB3519-5	0.159652	0.744793	4.75983e-06
HR32046F1-2-261	0.898256	0.016405	0.0134408
HR32054F1-1-29-1	0.807994	0.15065	0.000874221
HR32066F1-4-16-1	0.943665	0.000275915	0.00856719
HR32066F1-4-19-1	0.799097	0.131147	0.000620366
HR32067F1-2-14-1	0.879575	0.0623233	0.0192635
HR32067F1-3-5-1	0.805093	0.124599	0.00104315
HR32068F1-3-10-1	0.900798	0.026643	0.01486
HR32068F1-4-11-1	0.17475	0.71918	0.00234824
HR32069F1-1-13-1	0.1743	0.773867	0.0299231
HR32069F1-1-18-1	0.165874	0.581534	0.0534067
HR32069F1-1-3-1	0.0364465	0.891117	8.38043e-05
HR32069F1-2-4-1	0.903624	0.00277515	0.0178996
HR32069F1-3-5-1	0.932501	0.000212049	0.00787564
HR32080-HB3567-4	0.062663	0.902298	0.00468605
HR32086-HB3569-37	0.366113	0.556398	0.0471961
IDS 85	0.610855	0.108474	0.0105839
IDSA85	0.0379951	0.942805	0.00184888
IR 84105-B-B-B-TGR4	0.89233	0.0157622	0.00354177
Japonica 1	0.57339	0.378847	0.00629916
Jasmine 85-CRI	0.809137	0.136265	0.00562012
Jasmine 85-SARI	0.0954053	0.550456	0.000408632
JKE56-12	0.832083	0.00218276	0.0968268
JKE56-3	0.838328	0.0786761	0.0286191
JKE56-30	0.397705	0.197074	0.110358
KAF143	0.454466	0.250937	0.137945
KAF53	0.725729	0.216725	0.000302469
KBR 10	0.907901	0.0323646	0.0308213
KBR 12	0.704284	0.261951	0.00764626
KBR 2	0.640507	0.000125283	0.350169
KBR V4	0.0437472	0.924321	0.00172829
KE40	0.633916	0.245886	0.07585
KE53	0.762403	0.0810265	0.104878
Khao Hlanon(AfricaRice)	0.85963	0.104952	0.00174853
N1	0.406865	0.542013	0.0123947
NERICA-L 19	0.950686	0.0308458	0.0146469
NERICA-L 41	0.65102	0.324239	0.0118184
Obolo	0.326646	0.653277	0.00675842
Oreire	0.896935	0.0469814	0.000107134
ORYLUX 6	0.16978	0.720592	0.0467896
SA10-SARI	0.610217	0.367942	0.00527921
SA11-SARI	0.551919	0.233906	0.123708
SA12-SARI	0.795201	0.122612	0.00174097
SA13-SARI	0.112109	0.871206	0.00475988
SA14-SARI	0.390191	0.578461	0.00128076
SA15-SARI	0.77571	0.0634432	0.10145
SA17-SARI	0.727893	0.260209	0.00421117
SA18-SARI	0.581212	0.226377	0.120492
SA19-SARI	0.850003	0.0101336	0.0947852
SA1-SARI	0.163294	0.471083	0.152698
SA20-SARI	0.849465	0.13243	0.0141604
SA21-SARI	0.0166745	0.968601	1.54275e-05
SA22-SARI	0.873082	0.0817119	0.00236713
SA24-SARI	0.90609	0.0365374	0.0139991
SA25-SARI	0.324417	0.642602	0.00251249
SA26-SARI	0.835999	0.146498	0.0148
SA28-SARI	0.553966	0.354532	0.0163583
SA29-SARI	0.539268	0.00842202	0.000107082
SA2-SARI	0.768331	0.222821	0.00451404
SA30-SARI	0.839128	0.144234	0.012416
SA31-SARI	0.515842	0.00582964	0.405635
SA33-SARI	0.238799	0.694941	0.0205909
SA34-SARI	0.653534	0.329689	0.00925371
SA35-SARI	0.150451	0.832001	0.00643492
SA36-SARI	0.628359	0.201263	0.0992197
SA37-SARI	0.661344	0.321313	0.00444266
SA38-SARI	0.949435	0.0271044	0.00049857
SA39-SARI	0.661519	0.32391	0.00835685
SA3-SARI	0.664609	0.139539	0.131822
SA41-SARI	0.228042	0.759986	0.00391791
SA4-SARI	0.48488	0.441069	0.0365337
SA50-SARI	0.124012	0.859855	0.00514239
SA51-SARI	0.722718	0.261977	0.0072668
SA52-SARI	0.393627	0.57961	0.000691119
SA53-SARI	0.506359	0.00811058	0.000119522
SA54-SARI	0.158438	0.788635	0.018183
SA55-SARI	0.818458	0.163202	0.0113652
SA56-SARI	0.698447	0.283266	0.00296436
SA58-SARI	0.119819	0.86407	0.00587964
SA59-SARI	0.151466	0.837749	0.00329671
SA60-SARI	0.95049	0.000348299	0.00482254
SA61-SARI	0.630579	0.319989	0.0296147
SA62-SARI	0.813164	0.172159	0.0126443
SA63-SARI	0.644296	0.338574	0.00842049
SA64-SARI	0.0773822	0.900089	0.00196544
SA65-SARI	0.130964	0.831108	0.00774566
SA66-SARI	0.826206	0.0656098	0.0730641
SA68-SARI	0.955933	9.94149e-05	0.00476885
SA69-SARI	0.787184	0.0479413	0.106727
SA7-SARI	0.347152	0.600342	0.0201993
SA8-SARI	0.357316	0.25018	0.19701
SA9-SARI	0.822701	0.0504892	0.0697548
SAHEL 210	0.497464	0.352727	0.0036529
SAHEL 134	0.242237	0.745666	0.00197463
SAHEL 177	0.611833	0.366897	0.00688679
SR23364-128-1835-1-HV-1-1	0.450548	0.543537	0.00167002
SR23364-128-1907-1-HV-1-1	0.325235	0.642753	0.0113328
SR23364-133-171-1-HV-1-1	0.837401	6.46741e-05	0.112385
SR23364-133-17-1-HV-1-2	0.811674	0.172039	0.000298399
SR3305F2-60-2-2-HV-1-1	0.315976	0.674552	0.00228414
SR33705F2-60-1-1HV-1-1	0.0144246	0.969098	0.00075073
SR33705F2-60-1-2-HV-1-2	0.0134124	0.938751	0.00677703
SR33705F2-61-1-3-HV-1-1	0.372819	0.605679	0.00189735
SR33705F2-61-3-2-HV-1-1	0.0970108	0.868541	0.0218421
SR33705F2-67-1-1-HV-1-1	0.0630692	0.884511	0.0347328
SR34034F3-71-2-1-1-3	0.871818	0.12085	0.000270466
SR34042F3-22-1-1-1-3	0.346095	0.0168631	0.000118208
SR34042F3-22-1-1-5-3	0.547359	0.000364039	0.383037
SR34053(#5-52)-1-4-2-10-1-2	0.802515	0.0208928	0.154191
SR34053(#5-52)-1-4-2-10-3-1	0.454541	0.478128	0.0325076
SR34053(#5-52)-1-4-2-10-3-3	0.705311	0.100171	0.126253
SR34590-HB 3433-5-1-1	0.277149	0.691963	0.0110476
SR34590-HB 3433-8-3-1	0.791278	0.0590687	0.0995769
SR34590-HB3433-1-1-1	0.0373623	0.45263	0.135699
SR34590-HB3433-1-3-1	0.97266	8.00075e-05	0.00545862
SR34590-HB3433-1-3-1-1	0.552782	0.356753	0.00895618
SR34590-HB3433-2-1-1	0.307839	0.0050581	0.00423481
SR34590-HB3433-3-1-1	0.42769	0.384723	0.126136
SR34590-HB3433-5-1-1	0.876387	0.109003	0.00621404
SR34590-HB3433-6-1-1	0.806333	0.176017	0.011933
SR34590-HB3433-6-2-1	0.835418	0.0898514	0.00211931
SR34590-HB-3433-7-1-1	0.952858	0.0177769	0.00168382
SR34590-HB3433-7-2-1	0.22307	0.750765	0.013076
SR34590-HB3433-7-3-1	0.602346	3.65715e-06	0.127832
SR34590-HB3433-8-2-1	0.572929	0.375702	0.0142645
SR34598-HB-16-HV-1-1	0.638523	0.3346	0.0125813
SR34796-1-4-6-3-2-1	0.148046	0.839232	0.00267445
SR35230-2-9-2-2	0.809654	0.139645	0.000718059
SR35250-1-15-1-1	0.635344	0.176014	0.119058
SR35250-1-23-2-1	0.969842	0.000287637	0.00965868
SR35250-2-3-1-1	0.255732	0.727251	0.00676131
SR35250-2-4-2-3	0.565365	0.00198747	0.00129159
SR35266-2-11-1-1	0.88911	0.0927312	0.00397947
SR35266-2-11-1-1-1	0.106944	0.670597	0.106855
SR35266-2-11-4-1	0.249445	0.725646	0.000227082
SR35266-2-11-4-1-1	0.33046	0.632546	0.0145594
SR35266-2-12-1-1	0.974651	0.009732	0.0030371
SR35266-2-12-2-1	0.480154	0.506757	0.00281651
SR35266-2-12-4-1	0.801371	0.0578567	0.0934453
SR35266-2-16-1-1	0.143237	0.846584	0.00375532
SR35266-2-16-2-1	0.928845	0.0142377	0.00129454
SR35266-2-17-1-1	0.802237	0.175512	0.0161581
SR35266-2-17-2-1	0.960872	7.32264e-05	0.0240364
SR35266-2-18-1-1	0.58012	0.409654	6.18019e-05
SR35266-2-18-2-1	0.501333	0.477687	0.00721156
SR35266-2-18-3-1	0.651107	0.330139	0.000751137
SR35266-2-19-1-1	0.920759	0.0456057	0.000997347
SR35266-2-20-1-1	0.709985	0.273657	0.00433185
SR35266-2-20-3-1	0.985135	0.00280526	0.00576763
SR35266-2-20-3-1-1	0.468097	0.514108	0.00148415
SR35266-2-4-4-1	0.543099	0.400156	4.37227e-05
SR35266-3-1-3-1	0.941258	0.0279779	0.000604577
SR35266-3-1-5-1	0.476208	0.40116	0.0922739
SR35266-3-2-3-1	0.193234	0.669067	0.0930295
SR35266-3-2-4-1	0.454017	0.00363745	9.34592e-05
SR35266-3-3-5-1	0.565403	0.235131	0.105361
SR35276-2-4-3-1-1	0.927321	0.0116419	0.00449008
SR35276-2-4-3-2	0.655093	0.320688	0.00184568
SR35276-2-4-3-3	0.752346	0.0753858	0.0987033
SR35278-1-7-2-2	0.302612	0.67301	0.00405673
SR35278-1-7-3-2	0.822538	0.00311159	0.103593
SR35278-1-9-2-1	1.77351e-06	0.954447	0.00274054
SR35278-1-9-3-1	0.774523	0.208676	0.00799503
SR35278-1-9-3-3	0.449933	0.0363612	0.00277058
SR35278-2-10-1-2	0.204038	0.77467	0.00267964
SR35278-2-10-1-3	0.355979	0.611078	0.00418797
SR35285-2-8-4-1	0.0862743	0.324624	0.00043181
SR35300-1-HV-1-2	0.548138	0.286652	0.00404997
SR35311-HB3497-4	0.737837	0.225962	0.00140209
SR35311-HB3497-87	0.763426	0.22036	0.0113565
SR35311-HB3497-88	0.429252	0.010638	0.000184922
SR35329-HB3509-91	0.848199	0.0464161	0.0521065
Tog7291	0.882521	0.0973306	0.0151353
Togo Marshall	0.683157	0.305626	0.00641603
Toxx3377	0.900051	0.00424901	0.0562518
TV1	0.166933	0.8148	0.00139668
TV2	0.782072	0.0532555	0.0957548
UPL 30	0.804056	0.181729	0.00277526
UPL 32	0.86099	0.111626	0.00227686
UPL 39	0.177578	0.703574	0.0103498
UPL 44	0.343885	0.0584412	0.00111766
UPL 6	0.799066	0.17577	0.0153669
UPL 87	0.595262	0.388536	0.00692295
Viwornor short	0.877809	0.0393349	0.0460883
WAB 2085-TGR2-WAT4-1-1	0.435393	0.527343	0.000907594
WAB 2099-WAC1.FKR3-1-TGR1-2	0.106735	0.323927	6.23034e-06
WAB 2101-WAC4-1-TGR1-WAT3-5-TGR2	0.572075	0.412463	0.0055352
WAB 2135-WAC B-2-TGR3-WAT8-3	0.959143	0.00227949	0.0152048
WAB 2138-WAC B-2-TGR2-WAT5-1	0.724686	0.25468	0.0121158
WAIQ1-SARI	0.148662	0.63256	0.134886

## Sheet: Table S7
Table S7: Cluster memberships of the 295 rice genotypes.
Cluster 1	Cluster 2	Cluster 3
228	644 Gold	AgKE99-56
80 DAYS-SARI	AFRICARICE 4	AGRA-CRI-LOL-1-11
AFRICARICE 6	AgKE99-32	AGRA-CRI-LOL-1-7
AgKE99-26	ARICA 3	AGRA-CRI-LOL-2-7
AGRA-CRI-LOL-1-21	ART1005-21-1-1-1-B	AGRA-SARI
AGRA-CRI-LOL-2-27	ART101-99-1-2-B-B	ART75-14-1-2-B-B
AGRA-CRI-LOL-2-29	ART105-3-1-2-B-B	ART90-9-1-1-B-B
ARICA 2	ART108-2-1-1-B-B	ART93-112-1-1-B-B
ART100-56-1-1-B-B	ART112-85-1-1-B-B	CRI-1-21-5-12
ART100-57-1-2-B-B	ART120-26-1-1-B-B	CRI-AgraRice
ART112-74-1-1-B-B	ART125-26-1-1-B-B	CRI-Emopa
ART152-3-1-1-B-B	ART132-35-1-1-B-B	CRI-Kantinka
ART174-2-1-1-B-B	ART143-150-B-1-B-B	CRI-Mpuntuo
ART216-133-B-1-B-B	ART216-187-B-1-B-B	CRI-Oboafo
ART216-149-B-1-B-B	ART350:10-2-1-B	Enapa
ART216-173-B-1-B-B	ART350:2-4-3-B	FKR 62N
ART216-212-B-1-B-B	ART350:2-6-1-B	Gigante-SARI
ART245-1-16-1-B-B	ART387-9-1-1-1-B	IR 84105-B-B-B-TGR4
ART245-1-40-1-B-B	ART397-3-2-1-1-B	JKE56-3
ART248-1-97-1-B-B	ART478-13-8-1-1-B	JKE56-30
ART263-11-B-1-B-B	ART478-8-1-1-1-B	KBR 2
ART314-14-B-1-B-B	ART483-10-1-1-1-B	NERICA-L 19
ART387-2-1-1-1-0	ART484-19-1-1-1-B	SA22-SARI
ART397-12-1-1-1-B	ART58-46-1-1-B-B	SA31-SARI
ART430-16-1-1-1-5	ART58-5-1-1-B-B	SA38-SARI
ART493-16-1-1-1-B	ART64-32-1-1-B-B	SR34042F3-22-1-1-5-3
ART64-31-1-1-B-B	ART67-17-1-1-B-B	SR34053(#5-52)-1-4-2-10-1-2
ART64-55-1-1-B-B	ART67-21-1-2-B-B	SR34590-HB-3433-7-1-1
ART71-2-1-1-B-B	ART68-12-1-1-B-B	SR35266-2-12-4-1
ART75-30-1-1-B-B	ART71-96-1-1-B-B
ART75-8-1-2-B-B	ART73-69-1-2-B-B
ART79-12-1-1-B-B	ART75-33-1-1-B-B
ART84-35-1-1-B-B	ART75-56-1-2-B-B
ART90-46-1-1-B-B	ART75-57-1-1-B-B
ART98-147-1-1-B-B	ART85-48-1-1-B-B
ART98-4-1-1-B-B	ART90-12-1-1-B-B
BOUKE 189	Awarema
CRI-1-11-15-21	BETIA
CRI-1-11-15-5	CK3
CRI-AMANKWATIA	CRI-1-11-19-12
CRI-Dartey	DigJas-78
Digang	Ex-Baike (Asutware)
DigJas-3	GR18-SARI
DigJas-61	HB3519-5
Gigante	HR32046F1-2-261
HR32080-HB3567-4	HR32054F1-1-29-1
HR32086-HB3569-37	HR32066F1-4-16-1
IDSA85	HR32066F1-4-19-1
JKE56-12	HR32067F1-2-14-1
KAF143	HR32067F1-3-5-1
KBR 10	HR32068F1-3-10-1
KBR 12	HR32068F1-4-11-1
KBR V4	HR32069F1-1-13-1
KE40	HR32069F1-1-18-1
KE53	HR32069F1-1-3-1
N1	HR32069F1-2-4-1
NERICA-L 41	HR32069F1-3-5-1
SA11-SARI	IDS 85
SA15-SARI	Japonica 1
SA18-SARI	Jasmine 85-CRI
SA19-SARI	Jasmine 85-SARI
SA1-SARI	KAF53
SA21-SARI	Khao Hlanon(AfricaRice)
SA2-SARI	Obolo
SA36-SARI	Oreire
SA3-SARI	ORYLUX 6
SA4-SARI	SA10-SARI
SA51-SARI	SA12-SARI
SA54-SARI	SA13-SARI
SA61-SARI	SA14-SARI
SA64-SARI	SA17-SARI
SA65-SARI	SA20-SARI
SA66-SARI	SA24-SARI
SA69-SARI	SA25-SARI
SA8-SARI	SA26-SARI
SA9-SARI	SA28-SARI
SAHEL 134	SA29-SARI
SR23364-133-171-1-HV-1-1	SA30-SARI
SR33705F2-60-1-1HV-1-1	SA33-SARI
SR34053(#5-52)-1-4-2-10-3-1	SA34-SARI
SR34053(#5-52)-1-4-2-10-3-3	SA35-SARI
SR34590-HB 3433-8-3-1	SA37-SARI
SR34590-HB3433-3-1-1	SA39-SARI
SR34590-HB3433-5-1-1	SA41-SARI
SR34590-HB3433-7-2-1	SA50-SARI
SR34796-1-4-6-3-2-1	SA52-SARI
SR35230-2-9-2-2	SA53-SARI
SR35250-1-15-1-1	SA55-SARI
SR35266-2-11-1-1-1	SA56-SARI
SR35266-2-11-4-1-1	SA58-SARI
SR35266-2-17-2-1	SA59-SARI
SR35266-2-4-4-1	SA60-SARI
SR35266-3-1-5-1	SA62-SARI
SR35266-3-2-3-1	SA63-SARI
SR35266-3-3-5-1	SA68-SARI
SR35276-2-4-3-1-1	SA7-SARI
SR35276-2-4-3-3	SAHEL 210
SR35278-1-7-3-2	SAHEL 177
SR35329-HB3509-91	SR23364-128-1835-1-HV-1-1
Tog7291	SR23364-128-1907-1-HV-1-1
Togo Marshall	SR23364-133-17-1-HV-1-2
Toxx3377	SR3305F2-60-2-2-HV-1-1
TV1	SR33705F2-60-1-2-HV-1-2
TV2	SR33705F2-61-1-3-HV-1-1
Viwornor short	SR33705F2-61-3-2-HV-1-1
	SR33705F2-67-1-1-HV-1-1
	SR34034F3-71-2-1-1-3
	SR34042F3-22-1-1-1-3
	SR34590-HB 3433-5-1-1
	SR34590-HB3433-1-1-1
	SR34590-HB3433-1-3-1
	SR34590-HB3433-1-3-1-1
	SR34590-HB3433-2-1-1
	SR34590-HB3433-6-1-1
	SR34590-HB3433-6-2-1
	SR34590-HB3433-7-3-1
	SR34590-HB3433-8-2-1
	SR34598-HB-16-HV-1-1
	SR35250-1-23-2-1
	SR35250-2-3-1-1
	SR35250-2-4-2-3
	SR35266-2-11-1-1
	SR35266-2-11-4-1
	SR35266-2-12-1-1
	SR35266-2-12-2-1
	SR35266-2-16-1-1
	SR35266-2-16-2-1
	SR35266-2-17-1-1
	SR35266-2-18-1-1
	SR35266-2-18-2-1
	SR35266-2-18-3-1
	SR35266-2-19-1-1
	SR35266-2-20-1-1
	SR35266-2-20-3-1
	SR35266-2-20-3-1-1
	SR35266-3-1-3-1
	SR35266-3-2-4-1
	SR35276-2-4-3-2
	SR35278-1-7-2-2
	SR35278-1-9-2-1
	SR35278-1-9-3-1
	SR35278-1-9-3-3
	SR35278-2-10-1-2
	SR35278-2-10-1-3
	SR35285-2-8-4-1
	SR35300-1-HV-1-2
	SR35311-HB3497-4
	SR35311-HB3497-87
	SR35311-HB3497-88
	UPL 30
	UPL 32
	UPL 39
	UPL 44
	UPL 6
	UPL 87
	WAB 2085-TGR2-WAT4-1-1
	WAB 2099-WAC1.FKR3-1-TGR1-2
	WAB 2101-WAC4-1-TGR1-WAT3-5-TGR2
	WAB 2135-WAC B-2-TGR3-WAT8-3
	WAB 2138-WAC B-2-TGR2-WAT5-1
	WAIQ1-SARI

## Sheet: Table S8
Table S8: Factorial loadings, multi-traits genotype-ideotype distance indexes, and selection status of the 295 rice genotypes
GEN	FA1	FA2	MGIDI	Selection status
228	2.34086	-1.59255	1.08463	selected
644 Gold	1.64231	-0.8207	1.57461	non-selected
80 DAYS-SARI	1.92673	-0.57848	1.33677	non-selected
AFRICARICE 4	1.32136	-1.36427	1.93622	non-selected
AFRICARICE 6	2.23727	-1.51177	1.12682	non-selected
AgKE99-26	2.05016	-1.787	1.43405	non-selected
AgKE99-32	1.30591	-0.944879	1.906	non-selected
AgKE99-56	3.15162	2.2343	3.18113	non-selected
AGRA-CRI-LOL-1-11	2.74351	1.19939	2.19618	non-selected
AGRA-CRI-LOL-1-21	2.83877	-0.940396	0.373191	selected
AGRA-CRI-LOL-1-7	2.8564	1.05055	2.02821	non-selected
AGRA-CRI-LOL-2-27	2.79974	-1.00364	0.416153	non-selected
AGRA-CRI-LOL-2-29	2.83602	-1.01335	0.381831	selected
AGRA-CRI-LOL-2-7	2.93753	1.09001	2.05467	selected
AGRA-SARI	2.29348	0.552134	1.75747	non-selected
ARICA 2	2.82652	-1.00474	0.389807	selected
ARICA 3	0.988916	-3.24935	3.20093	non-selected
ART1005-21-1-1-1-B	1.3101	-0.982017	1.90215	non-selected
ART100-56-1-1-B-B	1.6804	-0.244836	1.6845	non-selected
ART100-57-1-2-B-B	2.0244	-0.566547	1.24674	non-selected
ART101-99-1-2-B-B	1.05458	-0.837838	2.16006	non-selected
ART105-3-1-2-B-B	0.866681	-1.5263	2.4159	non-selected
ART108-2-1-1-B-B	0.509654	-2.06397	2.92429	non-selected
ART112-74-1-1-B-B	2.26065	-0.108495	1.26757	non-selected
ART112-85-1-1-B-B	0.0132255	0.206942	3.40022	non-selected
ART120-26-1-1-B-B	0.48239	-2.07677	2.95438	non-selected
ART125-26-1-1-B-B	0.97072	-2.52959	2.74406	non-selected
ART132-35-1-1-B-B	0.906051	0.233243	2.59002	non-selected
ART143-150-B-1-B-B	1.194	-1.8214	2.19951	non-selected
ART152-3-1-1-B-B	2.46422	-0.987713	0.748844	selected
ART174-2-1-1-B-B	2.167	-0.5233	1.12727	non-selected
ART216-133-B-1-B-B	1.50861	-0.385672	1.79318	non-selected
ART216-149-B-1-B-B	1.65356	-0.291316	1.69038	non-selected
ART216-173-B-1-B-B	1.6649	-0.265763	1.69006	non-selected
ART216-187-B-1-B-B	0.884756	-0.614607	2.35067	non-selected
ART216-212-B-1-B-B	2.24775	-1.56862	1.14758	non-selected
ART245-1-16-1-B-B	2.16854	-0.532835	1.12229	selected
ART245-1-40-1-B-B	2.17117	-0.534989	1.11906	selected
ART248-1-97-1-B-B	2.39571	-1.01117	0.818779	selected
ART263-11-B-1-B-B	1.98023	-0.58626	1.28321	non-selected
ART314-14-B-1-B-B	1.79129	-0.463143	1.50052	non-selected
ART350_10-2-1-B	0.0139652	-0.662131	3.21054	non-selected
ART350_2-4-3-B	1.30748	-1.00095	1.90522	non-selected
ART350_2-6-1-B	1.04603	-3.36264	3.24499	non-selected
ART387-2-1-1-1-0	1.43185	-0.395723	1.86326	non-selected
ART387-9-1-1-1-B	1.31158	-1.01179	1.90147	non-selected
ART397-12-1-1-1-B	1.53728	-0.152021	1.85343	non-selected
ART397-3-2-1-1-B	0.8888	-1.6112	2.4164	non-selected
ART430-16-1-1-1-5	1.75876	-0.453982	1.53427	non-selected
ART478-13-8-1-1-B	0.445653	-0.114342	2.88865	non-selected
ART478-8-1-1-1-B	0.458613	-2.14657	3.00357	non-selected
ART483-10-1-1-1-B	0.517153	0.831279	3.22821	non-selected
ART484-19-1-1-1-B	0.723903	-0.107968	2.62544	non-selected
ART493-16-1-1-1-B	2.17121	-1.60308	1.23064	non-selected
ART58-46-1-1-B-B	0.948767	-2.76029	2.90044	non-selected
ART58-5-1-1-B-B	1.63424	-0.819126	1.58278	non-selected
ART64-31-1-1-B-B	2.65826	-1.52465	0.800666	selected
ART64-32-1-1-B-B	0.92239	-0.659988	2.30735	non-selected
ART64-55-1-1-B-B	1.97733	-0.584225	1.28657	non-selected
ART67-17-1-1-B-B	0.90903	-0.632816	2.32412	non-selected
ART67-21-1-2-B-B	1.34555	-1.00177	1.86719	non-selected
ART68-12-1-1-B-B	0.494567	-2.27622	3.02536	non-selected
ART71-2-1-1-B-B	1.83807	-0.307538	1.51506	non-selected
ART71-96-1-1-B-B	1.09368	-0.792414	2.12381	non-selected
ART73-69-1-2-B-B	1.19195	-0.916311	2.02019	non-selected
ART75-14-1-2-B-B	3.2604	0.697552	1.64452	non-selected
ART75-30-1-1-B-B	2.22355	-0.543199	1.06739	selected
ART75-33-1-1-B-B	1.09511	-4.12182	3.81641	non-selected
ART75-56-1-2-B-B	0.0145626	-0.677077	3.20866	non-selected
ART75-57-1-1-B-B	1.10617	-4.46371	4.09958	non-selected
ART75-8-1-2-B-B	1.56679	-0.18376	1.81324	non-selected
ART79-12-1-1-B-B	1.40882	-0.459902	1.86753	non-selected
ART84-35-1-1-B-B	2.23303	-0.973471	0.979258	selected
ART85-48-1-1-B-B	0.750185	-1.50098	2.52345	non-selected
ART90-12-1-1-B-B	0.0463647	-0.703149	3.17487	non-selected
ART90-46-1-1-B-B	1.81782	-0.436204	1.48447	non-selected
ART90-9-1-1-B-B	2.42964	1.12269	2.21189	non-selected
ART93-112-1-1-B-B	2.39377	0.259407	1.45704	non-selected
ART98-147-1-1-B-B	1.59912	-0.150729	1.79832	non-selected
ART98-4-1-1-B-B	1.55736	-0.186308	1.82073	non-selected
Awarema	1.12152	-0.780731	2.09693	non-selected
BETIA	0.930461	-0.685664	2.29629	non-selected
BOUKE 189	1.66459	-0.345108	1.66	non-selected
CK3	1.31355	-1.08649	1.90353	non-selected
CRI-1-11-15-21	2.77552	-0.119023	0.935281	selected
CRI-1-11-15-5	2.71707	-1.51676	0.755211	selected
CRI-1-11-19-12	0.00158192	-0.704675	3.21941	non-selected
CRI-1-21-5-12	2.8168	-0.457285	0.628653	selected
CRI-AgraRice	3.22003	0.622088	1.56837	non-selected
CRI-AMANKWATIA	2.86185	-1.06705	0.37032	selected
CRI-Dartey	1.72242	0.833655	2.32092	non-selected
CRI-Emopa	2.80085	0.909826	1.90106	non-selected
CRI-Kantinka	2.90352	0.921005	1.89256	non-selected
CRI-Mpuntuo	3.06537	0.960391	1.91227	non-selected
CRI-Oboafo	2.7924	0.618139	1.61967	non-selected
Digang	2.27202	-0.505978	1.03791	selected
DigJas-3	2.64105	-0.591129	0.672309	selected
DigJas-61	2.67288	-1.54784	0.807748	selected
DigJas-78	1.40199	-0.755606	1.81994	non-selected
Enapa	2.3524	2.46612	3.51896	non-selected
Ex-Baike (Asutware)	0.911848	-0.68686	2.31465	non-selected
FKR 62N	2.51547	0.739939	1.82436	non-selected
Gigante	1.49792	-0.252168	1.8492	non-selected
Gigante-SARI	2.77378	0.784397	1.78525	non-selected
GR18-SARI	0.632164	-0.973046	2.57989	non-selected
HB3519-5	1.59581	-1.18113	1.63308	non-selected
HR32046F1-2-261	0.976463	-1.17439	2.24706	non-selected
HR32054F1-1-29-1	0.892307	-0.714317	2.33117	non-selected
HR32066F1-4-16-1	0.842723	-1.12223	2.37572	non-selected
HR32066F1-4-19-1	0.927403	-0.719807	2.29571	non-selected
HR32067F1-2-14-1	0.548658	-0.888843	2.66387	non-selected
HR32067F1-3-5-1	0.923361	-0.724296	2.29929	non-selected
HR32068F1-3-10-1	0.70535	-0.952447	2.50657	non-selected
HR32068F1-4-11-1	1.58127	-1.16152	1.64479	non-selected
HR32069F1-1-13-1	1.79429	-0.967838	1.41779	non-selected
HR32069F1-1-18-1	1.2079	-0.503142	2.05241	non-selected
HR32069F1-1-3-1	1.71725	-1.25191	1.52559	non-selected
HR32069F1-2-4-1	0.792275	-1.07323	2.42297	non-selected
HR32069F1-3-5-1	0.88339	-1.06923	2.33177	non-selected
HR32080-HB3567-4	2.86838	-2.22028	1.31952	non-selected
HR32086-HB3569-37	1.43939	-0.272673	1.89619	non-selected
IDS 85	1.26552	-1.14353	1.95636	non-selected
IDSA85	2.27634	-1.64772	1.16933	non-selected
IR 84105-B-B-B-TGR4	3.25278	1.00962	1.9563	non-selected
Japonica 1	1.38462	-1.33779	1.86877	non-selected
Jasmine 85-CRI	1.15798	-1.33685	2.09074	non-selected
Jasmine 85-SARI	1.27549	-0.537215	1.97915	non-selected
JKE56-12	1.97535	-0.435918	1.33773	non-selected
JKE56-3	2.3546	0.646703	1.809	non-selected
JKE56-30	3.45779	-1.17522	0.335977	selected
KAF143	1.54378	-0.258518	1.80434	non-selected
KAF53	1.29449	-1.20676	1.93504	non-selected
KBR 10	2.70132	-0.328327	0.801587	selected
KBR 12	3.05736	-0.9578	0.154979	selected
KBR 2	3.81469	0.733931	1.78504	non-selected
KBR V4	2.82232	-2.25636	1.3668	non-selected
KE40	1.65265	-0.0374837	1.80476	non-selected
KE53	1.84717	-0.104118	1.60366	non-selected
Khao Hlanon(AfricaRice)	1.24036	-1.10077	1.9776	non-selected
N1	2.7629	-1.3468	0.601701	selected
NERICA-L 19	2.78022	0.715575	1.71699	non-selected
NERICA-L 41	2.95388	-1.05733	0.280925	selected
Obolo	1.59024	-1.73316	1.80251	non-selected
Oreire	1.15565	-1.09856	2.0619	non-selected
ORYLUX 6	1.77309	-0.962038	1.43891	non-selected
SA10-SARI	0.20547	-0.351723	3.06466	non-selected
SA11-SARI	1.59987	-0.15725	1.79478	non-selected
SA12-SARI	0.964322	-0.732674	2.25772	non-selected
SA13-SARI	-0.288872	0.965216	3.98864	non-selected
SA14-SARI	-1.39131	0.804204	4.92481	non-selected
SA15-SARI	1.86542	-0.120667	1.57944	non-selected
SA17-SARI	0.174847	-0.512983	3.06782	non-selected
SA18-SARI	1.64131	-0.0758327	1.79567	non-selected
SA19-SARI	1.90054	-0.523638	1.37779	non-selected
SA1-SARI	1.40242	-0.35898	1.90241	non-selected
SA20-SARI	0.866364	-1.85839	2.51666	non-selected
SA21-SARI	2.09819	-1.91042	1.47309	non-selected
SA22-SARI	2.41891	0.73373	1.85774	non-selected
SA24-SARI	0.700466	-0.931855	2.51149	non-selected
SA25-SARI	-0.927507	0.761127	4.47772	non-selected
SA26-SARI	0.87627	-1.90575	2.52504	non-selected
SA28-SARI	1.37183	-1.39305	1.89355	non-selected
SA29-SARI	1.32337	-0.766391	1.89708	non-selected
SA2-SARI	3.15415	-0.860351	0.103518	selected
SA30-SARI	0.884524	-1.88809	2.51074	non-selected
SA31-SARI	2.74665	0.451928	1.47356	non-selected
SA33-SARI	0.706734	-0.158663	2.62607	non-selected
SA34-SARI	1.13996	-2.32314	2.48773	non-selected
SA35-SARI	-0.318907	0.846751	3.95999	non-selected
SA36-SARI	1.69019	0.00498804	1.79458	non-selected
SA37-SARI	0.200929	-0.417165	3.05712	non-selected
SA38-SARI	3.76754	1.71135	2.71506	non-selected
SA39-SARI	1.23066	-1.82918	2.16909	non-selected
SA3-SARI	1.66972	-0.243353	1.69483	non-selected
SA41-SARI	-0.489755	0.763427	4.07742	non-selected
SA4-SARI	2.43742	-1.09035	0.78778	selected
SA50-SARI	-0.257338	0.893958	3.9271	non-selected
SA51-SARI	3.06154	-0.943128	0.150403	selected
SA52-SARI	-1.39825	0.810916	4.93369	non-selected
SA53-SARI	1.32491	-0.766665	1.89553	non-selected
SA54-SARI	2.43973	-1.52978	0.967864	selected
SA55-SARI	0.903359	-1.95797	2.52051	non-selected
SA56-SARI	0.284291	-0.485969	2.96358	non-selected
SA58-SARI	-0.256347	0.902074	3.93003	non-selected
SA59-SARI	-0.336938	0.873247	3.9881	non-selected
SA60-SARI	0.578848	-1.24284	2.64971	non-selected
SA61-SARI	2.58641	-0.980552	0.626438	selected
SA62-SARI	0.893267	-2.01368	2.55255	non-selected
SA63-SARI	1.14406	-2.41116	2.53416	non-selected
SA64-SARI	2.89578	-2.19263	1.28584	non-selected
SA65-SARI	2.60565	-1.73154	0.992086	selected
SA66-SARI	2.18404	-0.582116	1.09047	selected
SA68-SARI	0.57404	-1.29031	2.66022	non-selected
SA69-SARI	1.89518	-0.163068	1.53205	non-selected
SA7-SARI	0.877355	-0.364836	2.40587	non-selected
SA8-SARI	1.4948	-0.469389	1.7821	non-selected
SA9-SARI	2.13195	-0.562916	1.14598	non-selected
SAHEL 210	1.09209	-0.572574	2.1525	non-selected
SAHEL 134	3.17482	-1.93913	0.993565	selected
SAHEL 177	1.19701	-2.42858	2.50142	non-selected
SR23364-128-1835-1-HV-1-1	-0.129948	0.0534044	3.48817	non-selected
SR23364-128-1907-1-HV-1-1	0.793082	-0.297061	2.50444	non-selected
SR23364-133-171-1-HV-1-1	1.8238	-0.480063	1.46431	non-selected
SR23364-133-17-1-HV-1-2	-0.104893	-0.659653	3.32917	non-selected
SR3305F2-60-2-2-HV-1-1	0.0374958	0.193109	3.3727	non-selected
SR33705F2-60-1-1HV-1-1	2.29997	-2.27615	1.61253	non-selected
SR33705F2-60-1-2-HV-1-2	0.62216	0.406966	2.92199	non-selected
SR33705F2-61-1-3-HV-1-1	-1.11231	0.724505	4.63577	non-selected
SR33705F2-61-3-2-HV-1-1	0.234065	0.498446	3.30979	non-selected
SR33705F2-67-1-1-HV-1-1	0.83637	-0.0255549	2.54772	non-selected
SR34034F3-71-2-1-1-3	0.56351	-0.773799	2.65401	non-selected
SR34042F3-22-1-1-1-3	1.39337	-0.782651	1.82589	non-selected
SR34042F3-22-1-1-5-3	2.82758	0.250983	1.25742	non-selected
SR34053(#5-52)-1-4-2-10-1-2	3.39044	-0.0172118	0.946043	selected
SR34053(#5-52)-1-4-2-10-3-1	2.42137	-1.12875	0.81133	selected
SR34053(#5-52)-1-4-2-10-3-3	1.68492	-0.307988	1.65502	non-selected
SR34590-HB 3433-5-1-1	0.574466	-0.113275	2.76586	selected
SR34590-HB 3433-8-3-1	1.83752	-0.192929	1.56731	non-selected
SR34590-HB3433-1-1-1	1.60246	-0.840052	1.61295	non-selected
SR34590-HB3433-1-3-1	0.389652	-1.40945	2.86002	non-selected
SR34590-HB3433-1-3-1-1	0.36611	-0.359857	2.90559	non-selected
SR34590-HB3433-2-1-1	1.39119	-0.771037	1.82913	non-selected
SR34590-HB3433-3-1-1	1.49601	-0.203457	1.86978	non-selected
SR34590-HB3433-5-1-1	2.34372	-0.623743	0.926157	non-selected
SR34590-HB3433-6-1-1	0.877295	-2.08462	2.59737	non-selected
SR34590-HB3433-6-2-1	1.14818	-1.23173	2.08338	non-selected
SR34590-HB-3433-7-1-1	2.91186	0.683453	1.6571	non-selected
SR34590-HB3433-7-2-1	2.2399	-1.27921	1.02746	selected
SR34590-HB3433-7-3-1	1.62913	-0.611689	1.61775	non-selected
SR34590-HB3433-8-2-1	1.36695	-1.43748	1.90924	non-selected
SR34598-HB-16-HV-1-1	1.12349	-2.50665	2.60698	non-selected
SR34796-1-4-6-3-2-1	3.06219	-2.1093	1.17264	non-selected
SR35230-2-9-2-2	1.87368	0.130221	1.71746	non-selected
SR35250-1-15-1-1	1.60478	-0.314934	1.72668	non-selected
SR35250-1-23-2-1	0.446151	-1.38717	2.80069	non-selected
SR35250-2-3-1-1	-0.509523	0.685426	4.06343	non-selected
SR35250-2-4-2-3	1.32892	-0.784153	1.88995	non-selected
SR35266-2-11-1-1	1.08036	-1.31017	2.16239	non-selected
SR35266-2-11-1-1-1	1.28654	-0.123403	2.09384	non-selected
SR35266-2-11-4-1	1.63012	-1.55807	1.696	non-selected
SR35266-2-11-4-1-1	2.80278	-1.49711	0.68617	selected
SR35266-2-12-1-1	0.580733	-1.47731	2.68424	non-selected
SR35266-2-12-2-1	-0.197121	0.0148532	3.54193	non-selected
SR35266-2-12-4-1	2.42237	0.712	1.83663	non-selected
SR35266-2-16-1-1	0.0986996	0.55746	3.45735	non-selected
SR35266-2-16-2-1	1.03702	-1.10497	2.18068	non-selected
SR35266-2-17-1-1	0.855707	-2.14556	2.64387	non-selected
SR35266-2-17-2-1	2.47576	-0.0421768	1.16588	non-selected
SR35266-2-18-1-1	0.410068	-0.368125	2.86087	non-selected
SR35266-2-18-2-1	1.42735	-1.91698	2.03149	non-selected
SR35266-2-18-3-1	0.0893717	-0.377409	3.17393	non-selected
SR35266-2-19-1-1	0.761299	-1.55356	2.52474	non-selected
SR35266-2-20-1-1	1.10787	-2.03769	2.37028	non-selected
SR35266-2-20-3-1	0.465462	-1.23222	2.7613	non-selected
SR35266-2-20-3-1-1	1.45531	-2.04035	2.06947	non-selected
SR35266-2-4-4-1	2.51116	-1.0688	0.711387	selected
SR35266-3-1-3-1	0.830978	-0.913701	2.38116	non-selected
SR35266-3-1-5-1	1.5215	-0.00334774	1.93561	non-selected
SR35266-3-2-3-1	1.34034	-0.125271	2.04372	non-selected
SR35266-3-2-4-1	1.34869	-0.811343	1.8681	non-selected
SR35266-3-3-5-1	1.56472	-0.318937	1.7626	non-selected
SR35276-2-4-3-1-1	2.66625	-0.173938	0.945633	selected
SR35276-2-4-3-2	1.18428	-2.07299	2.31966	non-selected
SR35276-2-4-3-3	1.79322	-0.208368	1.59911	non-selected
SR35278-1-7-2-2	-0.652139	0.654815	4.18262	non-selected
SR35278-1-7-3-2	1.80296	-0.532655	1.4684	non-selected
SR35278-1-9-2-1	1.8584	-1.31032	1.40162	non-selected
SR35278-1-9-3-1	0.873659	-2.33004	2.71704	non-selected
SR35278-1-9-3-3	1.36631	-0.837964	1.84877	non-selected
SR35278-2-10-1-2	-0.452915	0.79095	4.05572	non-selected
SR35278-2-10-1-3	0.0762513	0.0942912	3.3038	non-selected
SR35285-2-8-4-1	1.5253	-0.951202	1.68662	non-selected
SR35300-1-HV-1-2	1.09331	-0.618453	2.14381	non-selected
SR35311-HB3497-4	-0.0234278	-0.555118	3.2589	non-selected
SR35311-HB3497-87	0.858096	-2.44855	2.79237	non-selected
SR35311-HB3497-88	1.35705	-0.825596	1.85878	non-selected
SR35329-HB3509-91	2.22868	-0.510297	1.07555	selected
Tog7291	2.972	-0.525782	0.484106	selected
Togo Marshall	3.15776	-1.05917	0.125223	selected
Toxx3377	2.20708	-0.329781	1.17887	non-selected
TV1	2.61172	-1.67162	0.941483	selected
TV2	1.78593	-0.275074	1.57604	non-selected
UPL 30	0.222503	-0.65225	3.00383	non-selected
UPL 32	1.09586	-1.36283	2.15666	non-selected
UPL 39	1.24764	0.2004	2.27447	non-selected
UPL 44	1.39156	-0.850176	1.82288	non-selected
UPL 6	0.988349	-1.83325	2.39395	non-selected
UPL 87	1.16147	-2.96742	2.87914	non-selected
Viwornor short	2.43871	-0.439406	0.924522	selected
WAB 2085-TGR2-WAT4-1-1	-1.48422	0.698029	4.97567	non-selected
WAB 2099-WAC1.FKR3-1-TGR1-2	1.51915	-0.965268	1.69287	non-selected
WAB 2101-WAC4-1-TGR1-WAT3-5-TGR2	1.21953	-3.00297	2.8635	non-selected
WAB 2135-WAC B-2-TGR3-WAT8-3	0.469631	-1.43648	2.78575	non-selected
WAB 2138-WAC B-2-TGR2-WAT5-1	0.918798	-2.5548	2.80104	non-selected
WAIQ1-SARI	-1.83648	1.9567	5.82352	non-selected
